## **Bioinformatics analyses of significant genes, related pathways and candidate prognostic biomarkers in Alzheimer's disease**

Basavaraj Vastrad<sup>1</sup>, Chanabasayya Vastrad\*<sup>2</sup>

1. Department of Biochemistry, Basaveshwar College of Pharmacy, Gadag, Karnataka 582103, India.
2. Biostatistics and Bioinformatics, Chanabasava Nilaya, Bharthinagar, Dharwad 580001, Karnataka, India.

\* Chanabasayya Vastrad

channu.vastrad@gmail.com

Ph: +919480073398

Chanabasava Nilaya, Bharthinagar,

Dharwad 580001 , Karanataka, India

## Abstract

Alzheimer's disease (AD) is one of the most common causes of dementia and frailty. This study aimed to use bioinformatics analysis to identify differentially expressed genes (DEGs) in AD. The Expression profiling by high throughput sequencing dataset GSE125583 was downloaded from the Gene Expression Omnibus (GEO) database and DEGs were identified. After assessment of Gene Ontology (GO) terms and pathway enrichment for DEGs, a protein-protein interaction (PPI) network, module analysis, miRNA-hub gene regulatory network construction and TF-hub gene regulatory network were conducted via comprehensive target prediction and network analyses. Finally, we validated hub genes by receiver operating characteristic curve (ROC) and RT-PCR. In total, 956 DEGs were identified in the AD samples, including 479 up regulated genes and 477 down regulated genes. Functional enrichment analysis showed that these DEGs are mainly involved in the neuronal system, GPCR ligand binding, regulation of biological quality and cell communication. The hub genes of PAK1, ELAVL2, NSF, HTR2C, TERT, UBD, MKI67, HSPB1, PYHIN1 and TES might be associated with AD. The diagnostic value and expression levels of these hub genes in AD were further confirmed by ROC analysis and RT-PCR. In conclusion, we identified pathways and crucial candidate genes that affect the outcomes of patients with AD, and these genes might serve as potential therapeutic targets.

**Keywords:** GEO database; bioinformatics analysis; Alzheimer's disease; pathways; differently expressed genes;

## Introduction

Alzheimer's disease (AD) is a complex, dementia that mainly affects the memory, cognitive, and behavior functions [1]. Approximately over 45 million elderly people worldwide are affected with AD worldwide in 2020 which is expected to rise to 115 million by the year 2050 [2]. AD involves the degeneration of nervous tissues [3]. Numerous factors might affect AD progression, including genetic (70%) and environmental (30%) [4]; however, the cause and potential molecular mechanism of AD are still unclear. Therefore, there is a crucial commitment to establish new diagnostic strategies and therapeutic agents to develop the prognosis of patients with AD.

To find out novel genes and signaling pathways that is linked with AD and patient prognosis, which might not only help to elucidate the underlying molecular mechanisms involved, but also to discover new biomarkers and therapeutic targets. Apolipoprotein E epsilon 4 (APOE) [5], amyloid- $\beta$  precursor protein (APP) [6], OPRM1 and OPRL1 [7], RAB10 [8], IL6 [9], Wnt/beta-catenin signaling pathway [10], glycogen synthase kinase-3 signaling pathway [11], insulin signaling pathway [12], CREB signaling pathway [13] and autotaxin-lysophosphatidic acid signaling pathway [14] are linked with development of AD. Therefore, identifying genes and the signal pathways, is essential for AD.

With the rapid advancement of bioinformatics such as RNA sequencing, some high throughput platforms for analysis of gene expression are frequently used to find the differentially expressed genes (DEGs) during disease progression. Now, through gene expression profiling studies using RNA sequencing, more and more DEGs linked with AD have been found.

Therefore, in the present study, we downloaded the original data (GSE125583), provided by Srinivasan et al [15], from the publically available Gene Expression Omnibus database (GEO, <http://www.ncbi.nlm.nih.gov/geo/>) [16] to identify DEGs and the associated biological processes between AD and healthy control using comprehensive bioinformatics analyses. The DEGs were subjected to gene ontology (GO) enrichment and pathway analyses; moreover, a protein-protein interaction (PPI) network, modules, miRNA-hub gene regulatory network construction and TF-hub gene regulatory network construction were

constructed and analyzed to screen for hub genes, miRNAs and TFs. Finally, hub genes were validated by receiver operating characteristic curve (ROC) and RT-PCR. The aim of this investigation was to find out hub genes and pathways in AD using bioinformatics methods and to then study the potential molecular mechanisms of AD.

## **Materials and methods**

### **Data resources**

Expression profiling by high throughput sequencing dataset GSE125583 [15] was downloaded from the GEO database. The data was produced using a GPL16791 Illumina HiSeq 2500 (Homo sapiens). The GSE125583 dataset contained data from 289 samples, including 219 AD samples and 70 normal control samples.

### **Identification of DEGs**

The identification of DEGs between AD and normal control was performed in limma package in R software [17], an tool designed to compare different groups of samples. The P values were adjusted to correct for the occurrence of false positive results by using the Benjamini and Hochberg False Discovery Rate method [18]. An adjusted  $P < 0.05$ , and a  $|\log_2FC| > 0.731$  for up regulated genes and  $|\log_2FC| < -0.696$  for down regulated genes were used as the cutoff values for identifying DEGs. Volcano plots of DEGs were provided using gplot package in R. The ggplot2 package in R was used to perform heatmap of up and down regulated genes in AD and healthy control.

### **GO and REACTOME pathway enrichment analysis of DEGs**

GO (<http://geneontology.org/>) [19] and REACTOME (<https://reactome.org/>) [20] pathway enrichment analyses were executed using g:Profiler (<http://biit.cs.ut.ee/gprofiler/>) [21]. All DEG symbols were input as a list into the g:Profiler website. The results of GO and REACTOME pathway enrichment analyses were provided by bioinformatics tools in the website. There are processes in GO analysis involved biological processes (BP), cellular components (CC) and molecular functions (MF). The pathways of REACTOME involved metabolism, genetic information processing, environment information-related processes, cell physiological processes and drug research.

## **PPI network establishment and modules selection**

Protein–protein interaction (PPI) analysis was performed using the Human Integrated Protein-Protein Interaction rEference (HIPPIE) interactome database (<http://cbdm-01.zdv.uni-mainz.de/~mschaefer/hippie/network.php>) [22], which is software used to explore interactions among proteins. All the symbols of DEGs were inputted. The network file among proteins was downloaded. Cytoscape software (version 3.8.2) ([www.cytoscape.org](http://www.cytoscape.org)) [23] is an excellent application for network visualization of proteins and was used to generate the PPI network plot constructed by nodes and edges. The hub genes were predicted by Network Analyzer, which is a plugin of Cytoscape to screen hub genes from numerous candidates. The ranks of the hub genes in the network were determined by the value of node degree [24], betweenness centrality [25], stress centrality [26] and closeness centrality [27], which are an algorithm provided by Network Analyzer. Because the node degree, betweenness centrality, stress centrality and closeness centrality values of genes are directly related to its importance, genes with a high node degree, betweenness centrality, stress centrality and closeness centrality value are more likely to be hub genes. The PEWCC1 (<http://apps.cytoscape.org/apps/PEWCC1>) [28], a plugin for Cytoscape, was used to screen the modules of the PPI network. The criteria were set as follows: degree cutoff=2, node score cutoff=0.2, k-core=2 and maximum depth=100. Moreover, the function and pathway enrichment analysis were performed for DEGs in the modules.

## **MiRNA-hub gene regulatory network construction**

miRNet database (<https://www.mirnet.ca/>) is a web-based tool developed by Fan and Xia [29] that supplies the largest available collection of predicted and experimentally verified miRNA-hub gene interactions with various novel and unique features. In the current investigation, hub genes of the DEGs were identified using miRNet database. Furthermore, Cytoscape (version 3.8.2) software [23] was used to establish the miRNA-hub gene regulatory network.

## **TF-hub gene regulatory network construction**

NetworkAnalyst database (<https://www.networkanalyst.ca/>) is a web-based tool developed by Zhou et al [30] that supplies the largest available collection of

predicted and experimentally verified TF-hub gene interactions with various novel and unique features. In the current investigation, hub genes of the DEGs were identified using NetworkAnalyst database. Furthermore, Cytoscape (version 3.8.2) software [23] was used to establish the miRNA-hub gene regulatory network.

### **Validation of hub genes by receiver operating characteristic curve (ROC) analysis**

The ROC curves were used to explore the sensitivity and specificity of hub genes for AD diagnosis using R packages “pROC” [31]. To further assess the predictive accuracy of the hub genes, ROC analysis was performed to discriminate AD from normal. The area under the ROC curve (AUC) was calculated and used to compare the diagnostic value of these genes.

### **Assessment of the mRNA expression of hub genes using RT-PCR**

SK-N-MC (ATCC HTB-10) culture for AD and neuronal progenitor cells (ATCC ACS-5007) a normal control were used to examine the mRNA expression of the hub genes in AD and normal control. SK-N-MC cells were maintained in 10% fetal bovine serum in Eagle's Minimum Essential Medium (EMEM). Neuronal progenitor cells were maintained in 10% fetal bovine serum in Dulbecco's modified Eagle's medium (DMEM) F-12 medium. SK-N-MC cells and neuronal progenitor cells were cultured at 37 °C and CO<sub>2</sub> concentration is 5%. Total RNA was extracted from SK-N-MC cells and neuronal progenitor cells using TRI Reagent (Sigma, USA) according to the manufacture' instruction. cDNA was synthesized as recommended by the manufacturer using a reverse transcription kit (Thermo Fisher Scientific, Waltham, MA, USA). Following the protocol provided by the manufacturer, the expression of the selected genes was quantified by the QuantStudio 7 Flex real-time PCR system (Thermo Fisher Scientific, Waltham, MA, USA) using the following procedures: initial denaturation and enzyme activation at 95 °C for 30 s, followed by 40 cycles of denaturation at 95 °C for 5 s and annealing at 60 °C for 30 s [32]. Moreover, the melting curve was analyzed for each gene at the end of RT-PCR.  $\beta$ -actin was used as an internal reference. Information on the primers is listed in Table 1.

## **Results**

## Identification of DEGs

Via limma package in R software, 956 DEGs (479 up regulated genes and 477 down regulated genes) (Table 2) in GSE125583 were extracted after gene expression profile data processing and standardization with the cutoff standard of adjusted  $P < 0.05$ , and a  $|\log_2FC| > 0.731$  for up regulated genes and  $|\log_2FC| < -0.696$ . The volcano plot of all DEGs in dataset was shown in Fig. 1. The DEGs were clustered in the heatmap between patients with AD patients and healthy control (Fig. 2).

## GO and REACTOME pathway enrichment analysis of DEGs

We performed GO and REACTOME pathway enrichment analysis to investigate the functions of DEGs using g:Profiler. The top GO (Table 3) and REACTOME pathway (Table 4) terms for DEGs were shown. For BP, DEGs were mainly enriched in regulation of biological quality, multicellular organismal process, cell communication and response to stimulus. The CC analysis indicated that proteins encoded by DEGs were mostly located in the cell junction, cell periphery, plasma membrane and extracellular region. DEGs in molecular function (MF) were significantly associated with channel activity, transmembranesignaling receptor activity, signaling receptor activity and G protein-coupled receptor activity. REACTOME pathway enrichment analysis showed that neuronal system, neurotransmitter receptors and postsynaptic signal transmission, GPCR ligand binding and signal transduction were significantly enriched in DEGs.

## PPI network establishment and modules selection

The PPI network of DEGs consisted of 6612 nodes and 13538 edges constructed in the HIPPIE interactome database and visualized using Cytoscape software (Fig.3). Based on the HIPPIE interactome database, the DEGs with the highest PPI scores identified by the four centrality methods are shown in Table 5. After repeated genes were removed, the hub genes (shown in Fig. 3, highlighted in green color for up regulated genes and red color for down regulated genes and shaped in round) were obtained using the four centrality methods, including PAK1, ELAVL2, NSF, HTR2C, TERT, UBD, MKI67, HSPB1, PYHIN1 and TES. A two significant modules were constructed from the PPI network of the DEGs using PEWCC1, including module 1 had 16 nodes and 38 edges (Fig. 4A) and module 2 had 47



nodes and 96 edges (Fig. 4B). GO and pathway enrichment analysis showed that genes in this module were markedly enriched in multicellular organismal process, neuronal system, regulation of biological quality, signal transduction, cell communication, plasma membrane, response to stimulus and cell communication.

### **MiRNA-hub gene regulatory network construction**

As illustrated in Fig. 5, the miRNA-hub gene regulatory network consists of 2316 nodes (301 hub genes and 2015 miRNAs) and 11018 edges. Notably, NEFL targeted 78 miRNAs (ex; hsa-mir-378a-3p); NSF targeted 45 miRNAs (ex; hsa-mir-100-5p); ELAVL2 targeted 43 miRNAs (ex; hsa-mir-27a-3p); PRKCE targeted 42 miRNAs (ex; hsa-mir-513a-5p); MYB targeted 34 miRNAs (ex; hsa-mir-15b-5p); ANLN targeted 126 miRNAs (ex; hsa-mir-138-1-3p); MKI67 targeted 124 miRNAs (ex; hsa-mir-548d-5p); SERPINH1 targeted 83 miRNAs (ex; hsa-mir-4726-3p); LATS2 targeted 70 miRNAs (ex; hsa-mir-320d) and TES targeted 70 miRNAs (ex; hsa-mir-1202) and are listed in Table 6.

### **TF-hub gene regulatory network construction**

As illustrated in Fig. 6, the TF-hub gene regulatory network consists of 386 (305 hub genes, 81 TFs) and 2380 edges. Notably, ELAVL2 targeted 15 TFs (ex; NRF1); MYB targeted 15 TFs (ex; STAT1); DCLK1 targeted 14 TFs (ex; YY1); CD70 targeted 10 TFs (ex; PPARG); TERT targeted 10 TFs (ex; E2F6); TP63 targeted 17 TFs (ex; ZNF354C); TES targeted 11 TFs (ex; ARID3A); LCK targeted 10 TFs (ex; FOXL1); HSPB1 targeted 9 TFs (ex; RUNX2) and PYHIN1 targeted 8 TFs (ex; TP53) and are listed in Table 6.

### **Validation of hub genes by receiver operating characteristic curve (ROC) analysis**

First of all, we performed the ROC curve analysis among 10 hub genes. The results showed that PAK1, ELAVL2, NSF, HTR2C, TERT, UBD, MKI67, HSPB1, PYHIN1 and TES achieved an AUC value of  $\square > \square 0.9$ , demonstrating that these eight genes have high sensitivity and specificity for AD, suggesting they can be served as biomarkers for the diagnosis of AD (Fig. 7A– Fig. 7J).

### **Assessment of the mRNA expression of hub genes using RT-PCR**



As shown in Fig. 8A– Fig. 8J , the identified hub genes exhibited the similar trend as predicted by bioinformatics analysis. All of the cases indicated up regulation of PAK1, ELAVL2, NSF, HTR2C, TERT, and down regulation of UBD, MKI67, HSPB1, PYHIN1 and TES in AD compared with healthy control.

## Discussion

Genetic modification is widely accepted as a robust molecular event of AD. Unfortunately, little knowledge has focused on genetic modification in AD. In the present study, essential candidate genes and enriched pathways of AD were identified by bioinformatics analysis. We extracted the expression profiling by high throughput sequencing data from GSE125583 and obtained 479 up regulated and 477 down regulated genes in AD. A new study reported the CRH (corticotropin releasing hormone) [33], SST (somatostatin) [34] and GABRR2 [35] could be a biomarkers of AD. TAC1 has been shown to be prognostic biomarkers and therapeutic targets in multiple sclerosis [36], but this gene might be responsible for progression of AD. VGF (VGF nerve growth factor inducible) is a key regulator in patients with amyotrophic lateral sclerosis [37], but this gene might be linked with development of AD. A previous study indicated that the expression of MMP8 [38] and MMP7 [39] are associated with development of dementia.

Functional enrichment analysis was performed based on the GO database and the REACTOME database to screen the key pathways and genes to provide insights into the physiological functions and progress of AD. Neuronal system [40], neurotransmitter receptors and postsynaptic signal transmission [41], signaling by GPCR [42], signal transduction [43], GPCR ligand binding [44], immune system [45], hemostasis [46], cell surface interactions at the vascular wall [47], cell periphery [48], channel activity [49], response to stimulus [50], plasma membrane [51], extracellular region [52], signaling receptor activity [53] and G protein-coupled receptor activity [54] were liable for progression of AD. Matsuzaki et al. [55], Shepard et al. [56], Lennertz et al. [57], Klemetilä et al. [58], Ullah et al. [59], Kim et al. [60], Sasayama et al. [61], Li et al. [62], Kowalczyk et al. [63] and Sun et al. [64] revealed that the expression of ADCYAP1, NPAS4, NPSR1, HTR2C, GABRB2, ALOX12B, ADRB3, EGR3, HSPA1A and IL3RA are associated with progression of schizophrenia, but these genes might be novel target

for AD. GABRA6 [65], GABRA1 [66], GABRG2 [67], SLC4A10 [68], HCN1 [69], GABRA4 [70], KCNC2 [71], SCN2A [72], SYN2 [73], FGF12 [74], SCN8A [75], OLFM3 [76], PLCB1 [77], KCNQ5 [78], TUBB2A [79], SIK1 [80], ABCC2 [81], SLC6A12 [82] and COL6A2 [83] have been reported to be closely related to the occurrence and development of epilepsy, but these genes might be novel target for AD. Previous investigation demonstrates that RGS4 [84], CXCL11 [85], EGR1 [86], CALB1 [87], BDNF (brain derived neurotrophic factor) [88], TERT (telomerase reverse transcriptase) [89], NEFL (neurofilament light) [90], SNAP25 [91], RPH3A [92], NRN1 [93], SYT1 [94], GRIN2B [95], AVP (arginine vasopressin) [96], VSNL1 [97], HTR2A [98], PAK3 [99], STXBP5L [100], HCRTR2 [101], SYP (synaptophysin) [102], SYT10 [103], PRKCE (protein kinase C epsilon) [104], NRG1 [105], KISS1 [106], NRXN3 [107], RAB3A [108], IGF1 [109], PLK2 [110], CBLN4 [111], CAP2 [112], SV2B [113], CAMK4 [114], INA (internexin neuronal intermediate filament protein alpha) [115], GAP43 [116], TTR (transthyretin) [117], CXCR2 [118], IL1R2 [119], CXCR4 [120], CCR2 [121], MYOCD (myocardin) [122], S100A12 [123], CXCR3 [124], PROK2 [125], CXCL8 [126], RGS1 [127], NOTCH3 [128], P2RX7 [129], NGFR (nerve growth factor receptor) [130], GDF15 [131], CR1 [132], ADORA2A [133], GPER1 [134], FCGR2B [135], MMP9 [136], CNN2 [137], C5AR1 [138], CCL15 [139], RBPMS (RNA binding protein, mRNA processing factor) [140], TBX2 [141], FPR2 [142], PCK1 [143], ADH1B [144], TLR5 [145], C7 [146] and CD163 [147] are thought to contribute to AD development and it has been reported to act as a potential biomarkers for AD treatment. IL1RAPL2 [148], GAD1 [149], EPHA5 [150], HTR1A [151], CADPS (calcium dependent secretion activator) [152], GABRG3 [153], LRFN5 [154] and CXCR1 [155] are expressed in autism spectrum disorders, but these genes might be novel target for AD. GAD2 [156], TAC3 [157], NCR1 [158], IL7R [159], GATA3 [160], FCRL3 [161] and IL18R1 [162] have been reported as most promising biomarkers for early diagnosis and prognosis prediction of multiple sclerosis, but these genes might be novel target for AD. FLT3 [163], CHRNB4 [164], PAK1 [165], CHRNB3 [166], GRIN2A [167], CHRNA6 [168], PENK (proenkephalin) [169], CHRNB4 [170], IGF2 [171], TLR9 [172] and CACNG5 [173] were revealed to serve an important role in Parkinson's disease, but these genes might be novel target for AD. The expression of SLC30A3 [174], NEFH (neurofilament heavy) [175], SYNGR4 [176], S100A4

[177], HSPB1 [178] and KIF5A [179] are associated with amyotrophic lateral sclerosis, but these genes might be novel target for AD.

Based on the node degree, betweenness centrality, stress centrality and closeness centrality in PPI network and modules, the hub genes were ranked. These identified hub genes were functioned as a group, and might play a crucial role in AD. ELAVL2 has been identified in autism spectrum disorders [180], but this gene might be novel target for AD. NEFM (neurofilament medium) was revealed to be expressed in AD [181]. NSF (N-ethylmaleimide sensitive factor, vesicle fusing ATPase), UBD (ubiquitin D), MKI67, PYHIN1, TES (testin LIM domain protein), MYL9 and TGFB1I1 might be the novel biomarkers for AD.

By analyzing the miRNA-hub gene regulatory network construction and TF-hub gene regulatory network, a number of hub genes, miRNAs and TFs were identified that might provide novel approaches for therapeutic investigations of AD. CD70 has been shown as a promising biomarker in multiple sclerosis [182], but this gene might be novel target for AD. Hsa-mir-378a-3p [183], hsa-mir-100-5p [183], hsa-mir-27a-3p [184], hsa-mir-15b-5p [185], hsa-mir-320d [186], NRF1 [187], STAT1 [188], YY1 [189], PPARG (peroxisome proliferator-activated receptor gamma) [190] and TP53 [191] have been shown to be an important role in AD. MYB (MYB proto-oncogene, transcription factor), ANLN (anillin actin binding protein), SERPINH1, LATS2, DCLK1, TP63, LCK (LCK proto-oncogene, Src family tyrosine kinase), hsa-mir-513a-5p, hsa-mir-138-1-3p, hsa-mir-548d-5p, hsa-mir-4726-3p, hsa-mir-1202, E2F6, ZNF354C, ARID3A, FOXL1 and RUNX2 might be the novel biomarkers for AD.

In conclusion, integrated bioinformatics analysis of multiple datasets of newly diagnosed AD patients and healthy controls was performed. Common DEGs were identified that are significantly enriched in various pathways, followed by evaluation of the prognostic value for patients with AD. Notably, most of the prognostic genes are neuron and immune related genes. The results of this investigation increase our understanding of the molecular drivers that underlie AD initiation and progression, and the identified key genes and pathways constitute potential therapeutic targets.

## **Acknowledgement**

I thank Brad A Friedman, Genentech, Inc., Bioinformatics, South San Francisco, CA, USA, very much, the author who deposited their profiling by high throughput sequencing dataset GSE125583, into the public GEO database.

### **Conflict of interest**

The authors declare that they have no conflict of interest.

### **Ethical approval**

This article does not contain any studies with human participants or animals performed by any of the authors.

### **Informed consent**

No informed consent because this study does not contain human or animals participants.

### **Availability of data and materials**

The datasets supporting the conclusions of this article are available in the GEO (Gene Expression Omnibus) (<https://www.ncbi.nlm.nih.gov/geo/>) repository. [(GSE125583) (<https://www.ncbi.nlm.nih.gov/geo/query/acc.cgi?acc=GSE125583>)]

### **Consent for publication**

Not applicable.

### **Competing interests**

The authors declare that they have no competing interests.

### **Author Contributions**

B. V. - Writing original draft, and review and editing

C. V. - Software and investigation

### **Authors**

Basavaraj Vastrad

ORCID ID: [0000-0003-2202-7637](https://orcid.org/0000-0003-2202-7637)

Chanabasayya Vastrad

ORCID ID: [0000-0003-3615-4450](https://orcid.org/0000-0003-3615-4450)

## References

1. Blennow K, Zetterberg H. Biomarkers for Alzheimer's disease: current status and prospects for the future. *J Intern Med*. 2018;284(6):643-663. doi:[10.1111/joim.12816](https://doi.org/10.1111/joim.12816)
2. Qiu S, Joshi PS, Miller MI, Xue C, Zhou X, Karjadi C, Chang GH, Joshi AS, Dwyer B, Zhu S, et al. Development and validation of an interpretable deep learning framework for Alzheimer's disease classification. *Brain*. 2020;143(6):1920-1933. doi:[10.1093/brain/awaa137](https://doi.org/10.1093/brain/awaa137)
3. Nasrabad SE, Rizvi B, Goldman JE, Brickman AM. White matter changes in Alzheimer's disease: a focus on myelin and oligodendrocytes. *Acta Neuropathol Commun*. 2018;6(1):22. doi:[10.1186/s40478-018-0515-3](https://doi.org/10.1186/s40478-018-0515-3)
4. Dorszewska J, Prendecki M, Oczkowska A, Dezor M, Kozubski W. Molecular Basis of Familial and Sporadic Alzheimer's Disease. *Curr Alzheimer Res*. 2016;13(9):952-963. doi:[10.2174/1567205013666160314150501](https://doi.org/10.2174/1567205013666160314150501)
5. Riedel BC, Thompson PM, Brinton RD. Age, APOE and sex: Triad of risk of Alzheimer's disease. *J Steroid Biochem Mol Biol*. 2016;160:134-147. doi:[10.1016/j.jsbmb.2016.03.012](https://doi.org/10.1016/j.jsbmb.2016.03.012)
6. Jonsson T, Atwal JK, Steinberg S, Snaedal J, Jonsson PV, Bjornsson S, Stefansson H, Sulem P, Gudbjartsson D, Maloney J, et al. A mutation in APP protects against Alzheimer's disease and age-related cognitive decline. *Nature*. 2012;488(7409):96-99. doi:[10.1038/nature11283](https://doi.org/10.1038/nature11283)
7. Xu C, Liu G, Ji H, Chen W, Dai D, Chen Z, Zhou D, Xu L, Hu H, Cui W, et al. Elevated methylation of OPRM1 and OPRL1 genes in Alzheimer's disease. *Mol Med Rep*. 2018;18(5):4297-4302. doi:[10.3892/mmr.2018.9424](https://doi.org/10.3892/mmr.2018.9424)
8. Tavana JP, Rosene M, Jensen NO, Ridge PG, Kauwe JS, Karch CM. RAB10: an Alzheimer's disease resilience locus and potential drug target. *Clin Interv Aging*. 2018;14:73-79. doi:[10.2147/CIA.S159148](https://doi.org/10.2147/CIA.S159148)
9. Sawkulycz X, Bradburn S, Robinson A, Payton A, Pendleton N, Murgatroyd C. Regulation of interleukin 6 by a polymorphic CpG within the frontal cortex in Alzheimer's disease. *Neurobiol Aging*. 2020;92:75-81. doi:[10.1016/j.neurobiolaging.2020.04.008](https://doi.org/10.1016/j.neurobiolaging.2020.04.008)

10. Jia L, Piña-Crespo J, Li Y. Restoring Wnt/ $\beta$ -catenin signaling is a promising therapeutic strategy for Alzheimer's disease. *Mol Brain*. 2019;12(1):104. doi:[10.1186/s13041-019-0525-5](https://doi.org/10.1186/s13041-019-0525-5)
11. Lauretti E, Dincer O, Praticò D. Glycogen synthase kinase-3 signaling in Alzheimer's disease. *Biochim Biophys Acta Mol Cell Res*. 2020;1867(5):118664. doi:[10.1016/j.bbamcr.2020.118664](https://doi.org/10.1016/j.bbamcr.2020.118664)
12. Akhtar A, Sah SP. Insulin signaling pathway and related molecules: Role in neurodegeneration and Alzheimer's disease. *Neurochem Int*. 2020;135:104707. doi:[10.1016/j.neuint.2020.104707](https://doi.org/10.1016/j.neuint.2020.104707)
13. Saura CA, Valero J. The role of CREB signaling in Alzheimer's disease and other cognitive disorders. *Rev Neurosci*. 2011;22(2):153-169. doi:[10.1515/RNS.2011.018](https://doi.org/10.1515/RNS.2011.018)
14. Ramesh S, Govindarajulu M, Suppiramaniam V, Moore T, Dhanasekaran M. Autotaxin  $\square$  Lysophosphatidic Acid Signaling in Alzheimer's Disease. *Int J Mol Sci*. 2018;19(7):1827. doi:[10.3390/ijms19071827](https://doi.org/10.3390/ijms19071827)
15. Srinivasan K, Friedman BA, Etxeberria A, Huntley MA, van der Brug MP, Foreman O, Paw JS, Modrusan Z, Beach TG, Serrano GE, et al. Alzheimer's Patient Microglia Exhibit Enhanced Aging and Unique Transcriptional Activation. *Cell Rep*. 2020;31(13):107843. doi:[10.1016/j.celrep.2020.107843](https://doi.org/10.1016/j.celrep.2020.107843)
16. Clough E, Barrett T. The Gene Expression Omnibus Database. *Methods Mol Biol*. 2016;1418:93-110. doi:[10.1007/978-1-4939-3578-9\\_5](https://doi.org/10.1007/978-1-4939-3578-9_5)
17. Ritchie ME, Phipson B, Wu D, Hu Y, Law CW, Shi W, Smyth GK. limma powers differential expression analyses for RNA-sequencing and microarray studies. *Nucleic Acids Res*. 2015;43(7):e47. doi:[10.1093/nar/gkv007](https://doi.org/10.1093/nar/gkv007)
18. Hardcastle TJ. Generalized empirical Bayesian methods for discovery of differential data in high-throughput biology. *Bioinformatics*. 2016;32(2):195-202. doi:[10.1093/bioinformatics/btv569](https://doi.org/10.1093/bioinformatics/btv569)
19. Thomas PD. The Gene Ontology and the Meaning of Biological Function. *Methods Mol Biol*. 2017;1446:15  $\square$  24. doi:[10.1007/978-1-4939-3743-1\\_2](https://doi.org/10.1007/978-1-4939-3743-1_2)
20. Fabregat A, Jupe S, Matthews L, Sidiropoulos K, Gillespie M, Garapati P, Haw R, Jassal B, Korninger F, May B et al. The Reactome Pathway Knowledgebase. *Nucleic Acids Res*. 2018;46(D1):D649–D655. doi:[10.1093/nar/gkx1132](https://doi.org/10.1093/nar/gkx1132)



21. Reimand J, Kull M, Peterson H, Hansen J, Vilo J. g:Profiler--a web-based toolset for functional profiling of gene lists from large-scale experiments. *Nucleic Acids Res.* 2007;35(Web Server issue):W193-W200. doi:[10.1093/nar/gkm226](https://doi.org/10.1093/nar/gkm226)
22. Alanis-Lobato G, Andrade-Navarro MA, Schaefer MH. HIPPIE v2.0: enhancing meaningfulness and reliability of protein-protein interaction networks. *Nucleic Acids Res.* 2017;45(D1):D408-D414. doi:[10.1093/nar/gkw985](https://doi.org/10.1093/nar/gkw985)
23. Shannon P, Markiel A, Ozier O, Baliga NS, Wang JT, Ramage D, Amin N, Schwikowski B, Ideker T. Cytoscape: a software environment for integrated models of biomolecular interaction networks. *Genome Res* 2003;13(11):2498-2504. doi:[10.1101/gr.1239303](https://doi.org/10.1101/gr.1239303)
24. Przulj N, Wigle DA, Jurisica I. Functional topology in a network of protein interactions. *Bioinformatics.* 2004;20(3):340–348. doi:[10.1093/bioinformatics/btg415](https://doi.org/10.1093/bioinformatics/btg415)
25. Nguyen TP, Liu WC, Jordán F. Inferring pleiotropy by network analysis: linked diseases in the human PPI network. *BMC Syst Biol.* 2011;5:179. doi:[10.1186/1752-0509-5-179](https://doi.org/10.1186/1752-0509-5-179)
26. Shi Z, Zhang B. Fast network centrality analysis using GPUs. *BMC Bioinformatics.* 2011;12:149. doi:[10.1186/1471-2105-12-149](https://doi.org/10.1186/1471-2105-12-149)
27. Fadhil E, Gamiieldien J, Mwambene EC. Protein interaction networks as metric spaces: a novel perspective on distribution of hubs. *BMC Syst Biol.* 2014;8:6. doi:[10.1186/1752-0509-8-6](https://doi.org/10.1186/1752-0509-8-6)
28. Zaki N, Efimov D, Berengueres J. Protein complex detection using interaction reliability assessment and weighted clustering coefficient. *BMC Bioinformatics.* 2013;14:163. doi:[10.1186/1471-2105-14](https://doi.org/10.1186/1471-2105-14)
29. Fan Y, Xia J (2018) miRNet-Functional Analysis and Visual Exploration of miRNA-Target Interactions in a Network Context. *Methods Mol Biol* 1819:215-233. doi:[10.1007/978-1-4939-8618-7\\_10](https://doi.org/10.1007/978-1-4939-8618-7_10)
30. Zhou G, Soufan O, Ewald J, Hancock REW, Basu N, Xia J (2019) NetworkAnalyst 3.0: a visual analytics platform for comprehensive gene expression profiling and meta-analysis. *Nucleic Acids Res* 47:W234-W241. doi:[10.1093/nar/gkz240](https://doi.org/10.1093/nar/gkz240)



31. Robin X, Turck N, Hainard A, Tiberti N, Lisacek F, Sanchez JC, Müller M. pROC: an open-source package for R and S+ to analyze and compare ROC curves. *BMC Bioinformatics* 2011;12:77. doi:[10.1186/1471-2105-12-77](https://doi.org/10.1186/1471-2105-12-77)
32. Livak KJ, Schmittgen TD. Analysis of relative gene expression data using real-time quantitative PCR and the 2<sup>-Delta Delta C(T)</sup> Method. *Methods* 2001;25:402–408. doi:[10.1006/meth.2001.1262](https://doi.org/10.1006/meth.2001.1262)
33. Näsman B, Olsson T, Fagerlund M, Eriksson S, Viitanen M, Carlström K. Blunted adrenocorticotropin and increased adrenal steroid response to human corticotropin-releasing hormone in Alzheimer's disease. *Biol Psychiatry*. 1996;39(5):311-318. doi:[10.1016/0006-3223\(95\)00173-5](https://doi.org/10.1016/0006-3223(95)00173-5)
34. SolarSKI M, Wang H, Wille H, Schmitt-Ulms G. Somatostatin in Alzheimer's disease: A new Role for an Old Player. *Prion*. 2018;12(1):1-8. doi:[10.1080/19336896.2017.1405207](https://doi.org/10.1080/19336896.2017.1405207)
35. Ma Z, Niu B, Shi Z, Li J, Wang J, Zhang F, Gao X, Zhang K. Genetic Polymorphism of GABRR2 Modulates Individuals' General Cognitive Ability in Healthy Chinese Han People. *Cell Mol Neurobiol*. 2017;37(1):93-100. doi:[10.1007/s10571-016-0347-2](https://doi.org/10.1007/s10571-016-0347-2)
36. Cunningham S, O'Doherty C, Patterson C, McDonnell G, Hawkins S, Marrosu MG, Vandenbroeck K. The neuropeptide genes TAC1, TAC3, TAC4, VIP and PACAP(ADCYAP1), and susceptibility to multiple sclerosis. *J Neuroimmunol*. 2007;183(1-2):208-213. doi:[10.1016/j.jneuroim.2006.11.002](https://doi.org/10.1016/j.jneuroim.2006.11.002)
37. Noda Y, Tanaka M, Nakamura S, Ito J, Kakita A, Hara H, Shimazawa M. Identification of VGF nerve growth factor inducible-producing cells in human spinal cords and expression change in patients with amyotrophic lateral sclerosis. *Int J Med Sci*. 2020;17(4):480-489. doi:[10.7150/ijms.39101](https://doi.org/10.7150/ijms.39101)
38. Singh H, Samani D, Nambiar N, Ghate MV, Gangakhedkar RR. Prevalence of MMP-8 gene polymorphisms in HIV-infected individuals and its association with HIV-associated neurocognitive disorder. *Gene*. 2018;646:83-90. doi:[10.1016/j.gene.2017.12.061](https://doi.org/10.1016/j.gene.2017.12.061)
39. Singh H, Marathe SD, Nain S, Nema V, Angadi M, Bapat SS, Ghate MV, Gangakhedkar RR. Impact of variants of MMP-7(-181A>G) gene in susceptibility to the development of HIV-associated neurocognitive disorder and its severity. *APMIS*. 2016;124(11):966-972. doi:[10.1111/apm.12594](https://doi.org/10.1111/apm.12594)

40. Geula C, Nagykerly N, Nicholas A, Wu CK. Cholinergic neuronal and axonal abnormalities are present early in aging and in Alzheimer disease. *J Neuropathol Exp Neurol.* 2008;67(4):309-318. doi:[10.1097/NEN.0b013e31816a1df3](https://doi.org/10.1097/NEN.0b013e31816a1df3)
41. Xu Y, Yan J, Zhou P, Li J, Gao H, Xia Y, Wang Q. Neurotransmitter receptors and cognitive dysfunction in Alzheimer's disease and Parkinson's disease. *Prog Neurobiol.* 2012;97(1):1-13. doi:[10.1016/j.pneurobio.2012.02.002](https://doi.org/10.1016/j.pneurobio.2012.02.002)
42. Sushma, Mondal AC. Role of GPCR signaling and calcium dysregulation in Alzheimer's disease. *Mol Cell Neurosci.* 2019;101:103414. doi:[10.1016/j.mcn.2019.103414](https://doi.org/10.1016/j.mcn.2019.103414)
43. Nguyen TV, Galvan V, Huang W, Banwait S, Tang H, Zhang J, Bredesen DE. Signal transduction in Alzheimer disease: p21-activated kinase signaling requires C-terminal cleavage of APP at Asp664. *J Neurochem.* 2008;104(4):1065-1080. doi:[10.1111/j.1471-4159.2007.05031.x](https://doi.org/10.1111/j.1471-4159.2007.05031.x)
44. Zhao J, Deng Y, Jiang Z, Qing H. G Protein-Coupled Receptors (GPCRs) in Alzheimer's Disease: A Focus on BACE1 Related GPCRs. *Front Aging Neurosci.* 2016;8:58. doi:[10.3389/fnagi.2016.00058](https://doi.org/10.3389/fnagi.2016.00058)
45. Jevtic S, Sengar AS, Salter MW, McLaurin J. The role of the immune system in Alzheimer disease: Etiology and treatment. *Ageing Res Rev.* 2017;40:84-94. doi:[10.1016/j.arr.2017.08.005](https://doi.org/10.1016/j.arr.2017.08.005)
46. Cortes-Canteli M, Zamolodchikov D, Ahn HJ, Strickland S, Norris EH. Fibrinogen and altered hemostasis in Alzheimer's disease. *J Alzheimers Dis.* 2012;32(3):599-608. doi:[10.3233/JAD-2012-120820](https://doi.org/10.3233/JAD-2012-120820)
47. Rius-Pérez S, Tormos AM, Pérez S, Taléns-Visconti R. Vascular pathology: Cause or effect in Alzheimer disease?. *Patología vascular: ¿causa o efecto en la enfermedad de Alzheimer?. Neurologia.* 2018;33(2):112-120. doi:[10.1016/j.nrl.2015.07.010](https://doi.org/10.1016/j.nrl.2015.07.010)
48. Chen SH, Bu XL, Jin WS, Shen LL, Wang J, Zhuang ZQ, Zhang T, Zeng F, Yao XQ, Zhou HD, et al. Altered peripheral profile of blood cells in Alzheimer disease: A hospital-based case-control study. *Medicine (Baltimore).* 2017;96(21):e6843. doi:[10.1097/MD.00000000000006843](https://doi.org/10.1097/MD.00000000000006843)
49. Arispe N, Pollard HB, Rojas E. beta-Amyloid Ca(2+)-channel hypothesis for neuronal death in Alzheimer disease. *Mol Cell Biochem.* 1994;140(2):119-125. doi:[10.1007/BF00926750](https://doi.org/10.1007/BF00926750)

50. Jensen-Dahm C, Werner MU, Jensen TS, Ballegaard M, Andersen BB, Høgh P, Waldemar G. Discrepancy between stimulus response and tolerance of pain in Alzheimer disease. *Neurology*. 2015;84(15):1575-1581. doi:[10.1212/WNL.0000000000001465](https://doi.org/10.1212/WNL.0000000000001465)
51. Verdier Y, Zarándi M, Penke B. Amyloid beta-peptide interactions with neuronal and glial cell plasma membrane: binding sites and implications for Alzheimer's disease. *J Pept Sci*. 2004;10(5):229-248. doi:[10.1002/psc.573](https://doi.org/10.1002/psc.573)
52. Avila J, Pallas N, Bolós M, Sayas CL, Hernandez F. Intracellular and extracellular microtubule associated protein tau as a therapeutic target in Alzheimer disease and other tauopathies. *Expert Opin Ther Targets*. 2016;20(6):653-661. doi:[10.1517/14728222.2016.1131269](https://doi.org/10.1517/14728222.2016.1131269)
53. Berridge MJ. Dysregulation of neural calcium signaling in Alzheimer disease, bipolar disorder and schizophrenia. *Prion*. 2013;7(1):2-13. doi:[10.4161/pri.21767](https://doi.org/10.4161/pri.21767)
54. Qiu WQ. Amylin and its G-protein-coupled receptor: A probable pathological process and drug target for Alzheimer's disease. *Neuroscience*. 2017;356:44-51. doi:[10.1016/j.neuroscience.2017.05.024](https://doi.org/10.1016/j.neuroscience.2017.05.024)
55. Matsuzaki S, Tohyama M. Regulation of pituitary adenylyl cyclase-activating polypeptide (PACAP, ADCYAP1: adenylyl cyclase-activating polypeptide 1) in the treatment of schizophrenia. *Expert Opin Ther Targets*. 2008;12(9):1097-1108. doi:[10.1517/14728222.12.9.1097](https://doi.org/10.1517/14728222.12.9.1097)
56. Shepard R, Heslin K, Hagerdorn P, Coutellier L. Downregulation of Npas4 in parvalbumin interneurons and cognitive deficits after neonatal NMDA receptor blockade: relevance for schizophrenia. *Transl Psychiatry*. 2019;9(1):99. doi:[10.1038/s41398-019-0436-3](https://doi.org/10.1038/s41398-019-0436-3)
57. Lennertz L, Quednow BB, Schuhmacher A, Petrovsky N, Frommann I, Schulze-Rauschenbach S, Landsberg MW, Steinbrecher A, Höfels S, Pukrop R, et al. The functional coding variant Asn107Ile of the neuropeptide S receptor gene (NPSR1) is associated with schizophrenia and modulates verbal memory and the acoustic startle response. *Int J Neuropsychopharmacol*. 2012;15(9):1205-1215. doi:[10.1017/S1461145711001623](https://doi.org/10.1017/S1461145711001623)
58. Klemetilä JP, Kampman O, Seppälä N, Viikki M, Hämäläinen M, Moilanen E, Mononen N, Lehtimäki T, Leinonen E. Association study of the HTR2C, leptin and adiponectin genes and serum marker analyses in clozapine treated

- long-term patients with schizophrenia. *Eur Psychiatry*. 2015;30(2):296-302. doi:[10.1016/j.eurpsy.2014.08.006](https://doi.org/10.1016/j.eurpsy.2014.08.006)
59. Ullah A, Long X, Mat WK, Hu T, Khan MI, Hui L, Zhang X, Sun P, Gao M, Wang J, et al. Highly Recurrent Copy Number Variations in GABRB2 Associated With Schizophrenia and Premenstrual Dysphoric Disorder. *Front Psychiatry*. 2020;11:572. doi:[10.3389/fpsy.2020.00572](https://doi.org/10.3389/fpsy.2020.00572)
60. Kim T, Kim HJ, Park JK, Kim JW, Chung JH. Association between polymorphisms of arachidonate 12-lipoxygenase (ALOX12) and schizophrenia in a Korean population. *Behav Brain Funct*. 2010;6:44. doi:[10.1186/1744-9081-6-44](https://doi.org/10.1186/1744-9081-6-44)
61. Sasayama D, Hori H, Teraishi T, Hattori K, Ota M, Tatsumi M, Higuchi T, Amano N, Kunugi H. Possible impact of ADRB3 Trp64Arg polymorphism on BMI in patients with schizophrenia. *Prog Neuropsychopharmacol Biol Psychiatry*. 2012;38(2):341-344. doi:[10.1016/j.pnpbp.2012.05.007](https://doi.org/10.1016/j.pnpbp.2012.05.007)
62. Li G, Han X, Gao W, Song Z, Zhao S, Sun F, Ma H, Cui A, Tang X, Ma G. Influence of EGR3 Transfection on Imaging and Behavior in Rats and Therapeutic Effect of Risperidone in Schizophrenia Model. *Front Psychiatry*. 2020;11:00787. doi:[10.3389/fpsy.2020.00787](https://doi.org/10.3389/fpsy.2020.00787)
63. Kowalczyk M, Kucia K, Owczarek A, Suchanek-Raif R, Merk W, Paul-Samojedny M, Kowalski J. Association Studies of HSPA1A and HSPA1L Gene Polymorphisms With Schizophrenia. *Arch Med Res*. 2018;49(5):342-349. doi:[10.1016/j.arcmed.2018.10.002](https://doi.org/10.1016/j.arcmed.2018.10.002)
64. Sun S, Wei J, Li H, Jin S, Li P, Ju G, Liu Y, Zhang XY. A family-based study of the IL3RA gene on susceptibility to schizophrenia in a Chinese Han population. *Brain Res*. 2009;1268:13-16. doi:[10.1016/j.brainres.2009.02.071](https://doi.org/10.1016/j.brainres.2009.02.071)
65. Prasad DK, Shaheen U, Satyanarayana U, Prabha TS, Jyothy A, Munshi A. Association of GABRA6 1519 T>C (rs3219151) and Synapsin II (rs37733634) gene polymorphisms with the development of idiopathic generalized epilepsy. *Epilepsy Res*. 2014;108(8):1267-1273. doi:[10.1016/j.eplepsyres.2014.07.001](https://doi.org/10.1016/j.eplepsyres.2014.07.001)
66. Hernandez CC, XiangWei W, Hu N, Shen D, Shen W, Lagrange AH, Zhang Y, Dai L, Ding C, Sun Z, et al. Altered inhibitory synapses in de novo GABRA5 and GABRA1 mutations associated with early onset epileptic encephalopathies. *Brain*. 2019;142(7):1938-1954. doi:[10.1093/brain/awz123](https://doi.org/10.1093/brain/awz123)

67. Kang JQ, Macdonald RL. Molecular Pathogenic Basis for GABRG2 Mutations Associated With a Spectrum of Epilepsy Syndromes, From Generalized Absence Epilepsy to Dravet Syndrome. *JAMA Neurol.* 2016;73(8):1009-1016. doi:[10.1001/jamaneurol.2016.0449](https://doi.org/10.1001/jamaneurol.2016.0449)
68. Gurnett CA, Veile R, Zempel J, Blackburn L, Lovett M, Bowcock A. Disruption of sodium bicarbonate transporter SLC4A10 in a patient with complex partial epilepsy and mental retardation. *Arch Neurol.* 2008;65(4):550-553. doi:[10.1001/archneur.65.4.550](https://doi.org/10.1001/archneur.65.4.550)
69. Marini C, Porro A, Rastetter A, Dalle C, Rivolta I, Bauer D, Oegema R, Nava C, Parrini E, Mei D, et al. HCN1 mutation spectrum: from neonatal epileptic encephalopathy to benign generalized epilepsy and beyond. *Brain.* 2018;141(11):3160-3178. doi:[10.1093/brain/awy263](https://doi.org/10.1093/brain/awy263)
70. Fan C, Gao Y, Liang G, Huang L, Wang J, Yang X, Shi Y, Dräger UC, Zhong M, Gao TM, et al. Transcriptomics of Gabra4 knockout mice reveals common NMDAR pathways underlying autism, memory, and epilepsy. *Mol Autism.* 2020;11(1):13. doi:[10.1186/s13229-020-0318-9](https://doi.org/10.1186/s13229-020-0318-9)
71. Vetri L, Cali F, Vinci M, Amato C, Roccella M, Granata T, Freri E, Solazzi R, Romano V, Elia M. A de novo heterozygous mutation in KCNC2 gene implicated in severe developmental and epileptic encephalopathy. *Eur J Med Genet.* 2020;63(4):103848. doi:[10.1016/j.ejmg.2020.103848](https://doi.org/10.1016/j.ejmg.2020.103848)
72. Li X, Zhang J, Wu X, Yan H, Zhang Y, He RH, Tang YJ, He YJ, Tan D, Mao XY, et al. Polymorphisms of ABAT, SCN2A and ALDH5A1 may affect valproic acid responses in the treatment of epilepsy in Chinese. *Pharmacogenomics.* 2016;17(18):2007-2014. doi:[10.2217/pgs-2016-0093](https://doi.org/10.2217/pgs-2016-0093)
73. Haerian BS, Lim KS, Tan HJ, Wong CP, Wong SW, Tan CT, Raymond AA, Mohamed Z. Lack of association between synapsin II (SYN2) gene polymorphism and susceptibility epilepsy: a case-control study and meta-analysis. *Synapse.* 2011;65(10):1073-1079. doi:[10.1002/syn.20939](https://doi.org/10.1002/syn.20939)
74. Verheyen S, Speicher MR, Ramler B, Plecko B. Childhood-onset epileptic encephalopathy due to FGF12 exon 1-4 tandem duplication. *Neurol Genet.* 2020;6(5):e494. doi:[10.1212/NXG.0000000000000494](https://doi.org/10.1212/NXG.0000000000000494)
75. Tidball AM, Lopez-Santiago LF, Yuan Y, Glenn TW, Margolis JL, Clayton Walker J, Kilbane EG, Miller CA, Martina Bebin E, Scott Perry M, et al. Variant-specific changes in persistent or resurgent sodium current in



- SCN8A-related epilepsy patient-derived neurons. *Brain*. 2020;143(10):3025-3040. doi:[10.1093/brain/awaa247](https://doi.org/10.1093/brain/awaa247)
76. Tang S, Wang T, Zhang X, Guo Y, Xu P, Zeng J, Luo Z, Li D, Zheng Y, Luo Y, et al. Olfactomedin-3 Enhances Seizure Activity by Interacting With AMPA Receptors in Epilepsy Models. *Front Cell Dev Biol*. 2020;8:722. doi:[10.3389/fcell.2020.00722](https://doi.org/10.3389/fcell.2020.00722)
77. Desprairies C, Valence S, Maurey H, Helal SI, Weckhuysen S, Soliman H, Mefford HC, Spentchian M, Héron D, Leguern E, et al. Three novel patients with epileptic encephalopathy due to biallelic mutations in the PLCB1 gene. *Clin Genet*. 2020;97(3):477-482. doi:[10.1111/cge.13696](https://doi.org/10.1111/cge.13696)
78. Lehman A, Thouta S, Mancini GMS, Naidu S, van Slegtenhorst M, McWalter K, Person R, Mwenifumbo J, Salvarinova R. Loss-of-Function and Gain-of-Function Mutations in KCNQ5 Cause Intellectual Disability or Epileptic Encephalopathy. *Am J Hum Genet*. 2017;101(1):65-74. doi:[10.1016/j.ajhg.2017.05.016](https://doi.org/10.1016/j.ajhg.2017.05.016)
79. Cushion TD, Paciorkowski AR, Pilz DT, Mullins JG, Seltzer LE, Marion RW, Tuttle E, Ghoneim D, Christian SL, Chung SK, et al. De novo mutations in the beta-tubulin gene TUBB2A cause simplified gyral patterning and infantile-onset epilepsy. *Am J Hum Genet*. 2014;94(4):634-641. doi:[10.1016/j.ajhg.2014.03.009](https://doi.org/10.1016/j.ajhg.2014.03.009)
80. Hansen J, Snow C, Tuttle E, Ghoneim DH, Yang CS, Spencer A, Gunter SA, Smyser CD, Gurnett CA, Shinawi M, et al. De novo mutations in SIK1 cause a spectrum of developmental epilepsies. *Am J Hum Genet*. 2015;96(4):682-690. doi:[10.1016/j.ajhg.2015.02.013](https://doi.org/10.1016/j.ajhg.2015.02.013)
81. Al-Eitan LN, Al-Dalalah IM, Mustafa MM, Alghamdi MA, Elshammari AK, Khreisat WH, Aljamal HA. Effects of MTHFR and ABCC2 gene polymorphisms on antiepileptic drug responsiveness in Jordanian epileptic patients. *Pharmgenomics Pers Med*. 2019;12:87-95. doi:[10.2147/PGPM.S211490](https://doi.org/10.2147/PGPM.S211490)
82. Li J, Lin H, Niu F, Zhu X, Shen N, Wang X, Li L, Liu A, Wu X, Sun W, et al. Combined effect between two functional polymorphisms of SLC6A12 gene is associated with temporal lobe epilepsy. *J Genet*. 2015;94(4):637-642. doi:[10.1007/s12041-015-0567-0](https://doi.org/10.1007/s12041-015-0567-0)
83. Karkheiran S, Krebs CE, Makarov V, Nilipour Y, Hubert B, Darvish H, Frucht S, Shahidi GA, Buxbaum JD, Paisán-Ruiz C. Identification of

- COL6A2 mutations in progressive myoclonus epilepsy syndrome. *Hum Genet.* 2013;132(3):275-283. doi:[10.1007/s00439-012-1248-1](https://doi.org/10.1007/s00439-012-1248-1)
84. Emilsson L, Saetre P, Jazin E. Low mRNA levels of RGS4 splice variants in Alzheimer's disease: association between a rare haplotype and decreased mRNA expression. *Synapse.* 2006;59(3):173-176. doi:[10.1002/syn.20226](https://doi.org/10.1002/syn.20226)
85. Koper OM, Kamińska J, Sawicki K, Kemon H. CXCL9, CXCL10, CXCL11, and their receptor (CXCR3) in neuroinflammation and neurodegeneration. *Adv Clin Exp Med.* 2018;27(6):849-856. doi:[10.17219/acem/68846](https://doi.org/10.17219/acem/68846)
86. Bakalash S, Pham M, Koronyo Y, Salumbides BC, Kramerov A, Seidenberg H, Berel D, Black KL, Koronyo-Hamaoui M. Egr1 expression is induced following glatiramer acetate immunotherapy in rodent models of glaucoma and Alzheimer's disease. *Invest Ophthalmol Vis Sci.* 2011;52(12):9033-9046. doi:[10.1167/iovs.11-7498](https://doi.org/10.1167/iovs.11-7498)
87. Sanfilippo C, Castrogiovanni P, Imbesi R, Di Rosa M. CHI3L2 Expression Levels Are Correlated with AIF1, PECAM1, and CALB1 in the Brains of Alzheimer's Disease Patients. *J Mol Neurosci.* 2020;70(10):1598-1610. doi:[10.1007/s12031-020-01667-9](https://doi.org/10.1007/s12031-020-01667-9)
88. Borba EM, Duarte JA, Bristot G, Scotton E, Camozzato AL, Chaves ML. Brain-Derived Neurotrophic Factor Serum Levels and Hippocampal Volume in Mild Cognitive Impairment and Dementia due to Alzheimer Disease. *Dement Geriatr Cogn Dis Extra.* 2016;6(3):559-567. doi:[10.1159/000450601](https://doi.org/10.1159/000450601)
89. Scarabino D, Broggio E, Gambina G, Pelliccia F, Corbo RM. Common variants of human TERT and TERC genes and susceptibility to sporadic Alzheimer's disease. *Exp Gerontol.* 2017;88:19-24. doi:[10.1016/j.exger.2016.12.017](https://doi.org/10.1016/j.exger.2016.12.017)
90. Moscoso A, Grothe MJ, Ashton NJ, Karikari TK, Lantero Rodríguez J, Snellman A, Suárez-Calvet M, Blennow K, Zetterberg H, Schöll M. Longitudinal Associations of Blood Phosphorylated Tau181 and Neurofilament Light Chain With Neurodegeneration in Alzheimer Disease. *JAMA Neurol.* 2021;78(4):396-406. doi:[10.1001/jamaneurol.2020.4986](https://doi.org/10.1001/jamaneurol.2020.4986)
91. Agostini S, Mancuso R, Liuzzo G, Bolognesi E, Costa AS, Bianchi A, Clerici M. Serum miRNAs Expression and SNAP-25 Genotype in Alzheimer's Disease. *Front Aging Neurosci.* 2019;11:52. doi:[10.3389/fnagi.2019.00052](https://doi.org/10.3389/fnagi.2019.00052)



92. Tan MG, Lee C, Lee JH, Francis PT, Williams RJ, Ramírez MJ, Chen CP, Wong PT, Lai MK. Decreased rabphilin 3A immunoreactivity in Alzheimer's disease is associated with A $\beta$  burden. *Neurochem Int.* 2014;64:29-36. doi:[10.1016/j.neuint.2013.10.013](https://doi.org/10.1016/j.neuint.2013.10.013)
93. Piras IS, Krate J, Delvaux E, Nolz J, De Both MD, Mastroeni DF, Serrano GE, Sue LI, Beach TG, Coleman PD, et al. Association of AEBP1 and NRN1 RNA expression with Alzheimer's disease and neurofibrillary tangle density in middle temporal gyrus. *Brain Res.* 2019;1719:217-224. doi:[10.1016/j.brainres.2019.06.004](https://doi.org/10.1016/j.brainres.2019.06.004)
94. Shi Z, Zhang K, Zhou H, Jiang L, Xie B, Wang R, Xia W, Yin Y, Gao Z, Cui D, et al. Increased miR-34c mediates synaptic deficits by targeting synaptotagmin 1 through ROS-JNK-p53 pathway in Alzheimer's Disease. *Aging Cell.* 2020;19(3):e13125. doi:[10.1111/accel.13125](https://doi.org/10.1111/accel.13125)
95. Andreoli V, De Marco EV, Trecroci F, Cittadella R, Di Palma G, Gambardella A. Potential involvement of GRIN2B encoding the NMDA receptor subunit NR2B in the spectrum of Alzheimer's disease. *J Neural Transm (Vienna).* 2014;121(5):533-542. doi:[10.1007/s00702-013-1125-7](https://doi.org/10.1007/s00702-013-1125-7)
96. Peskind ER, Pascualy M, Edland SD, Wingerson D, Dobie DJ, Raskind MA. Plasma arginine vasopressin response to hypertonic saline infusion in Alzheimer disease. *Alzheimer Dis Assoc Disord.* 1995;9(4):238-242.
97. Lin CW, Chang LC, Tseng GC, Kirkwood CM, Sibille EL, Sweet RA. VSNL1 Co-Expression Networks in Aging Include Calcium Signaling, Synaptic Plasticity, and Alzheimer's Disease Pathways. *Front Psychiatry.* 2015;6:30. doi:[10.3389/fpsy.2015.00030](https://doi.org/10.3389/fpsy.2015.00030)
98. Wilkosz PA, Kodavali C, Weamer EA, Miyahara S, Lopez OL, Nimgaonkar VL, DeKosky ST, Sweet RA. Prediction of psychosis onset in Alzheimer disease: the role of depression symptom severity and the HTR2A T102C polymorphism. *Am J Med Genet B Neuropsychiatr Genet.* 2007;144B(8):1054-1062. doi:[10.1002/ajmg.b.30549](https://doi.org/10.1002/ajmg.b.30549)
99. McPhie DL, Coopersmith R, Hines-Peralta A, Chen Y, Ivins KJ, Manly SP, Kozlowski MR, Neve KA, Neve RL. DNA synthesis and neuronal apoptosis caused by familial Alzheimer disease mutants of the amyloid precursor protein are mediated by the p21 activated kinase PAK3. *J Neurosci.* 2003;23(17):6914-6927. doi:[10.1523/JNEUROSCI.23-17-06914.2003](https://doi.org/10.1523/JNEUROSCI.23-17-06914.2003)

100. Kumar R, Corbett MA, Smith NJ, Jolly LA, Tan C, Keating DJ, Duffield MD, Utsumi T, Moriya K, Smith KR, et al. Homozygous mutation of STXBP5L explains an autosomal recessive infantile-onset neurodegenerative disorder. *Hum Mol Genet.* 2015;24(7):2000-2010. doi:[10.1093/hmg/ddu614](https://doi.org/10.1093/hmg/ddu614)
101. Gallone S, Boschi S, Rubino E, De Martino P, Scarpini E, Galimberti D, Fenoglio C, Acutis PL, Maniaci MG, Pinessi L, et al. Is HCRTR2 a genetic risk factor for Alzheimer's disease?. *Dement Geriatr Cogn Disord.* 2014;38(3-4):245-253. doi:[10.1159/000359964](https://doi.org/10.1159/000359964)
102. Liu SJ, Yang C, Zhang Y, Su RY, Chen JL, Jiao MM, Chen HF, Zheng N, Luo S, Chen YB, et al. Neuroprotective effect of  $\beta$ -asarone against Alzheimer's disease: regulation of synaptic plasticity by increased expression of SYP and GluR1. *Drug Des Devel Ther.* 2016;10:1461-1469. doi:[10.2147/DDDT.S93559](https://doi.org/10.2147/DDDT.S93559)
103. Woitecki AM, Müller JA, van Loo KM, Sowade RF, Becker AJ, Schoch S. Identification of Synaptotagmin 10 as Effector of NPAS4-Mediated Protection from Excitotoxic Neurodegeneration. *J Neurosci.* 2016;36(9):2561-2570. doi:[10.1523/JNEUROSCI.2027-15.2016](https://doi.org/10.1523/JNEUROSCI.2027-15.2016)
104. de Barry J, Liégeois CM, Janoshazi A. Protein kinase C as a peripheral biomarker for Alzheimer's disease. *Exp Gerontol.* 2010;45(1):64-69. doi:[10.1016/j.exger.2009.10.015](https://doi.org/10.1016/j.exger.2009.10.015)
105. Mouton-Liger F, Dumurgier J, Cognat E, Hourregue C, Zetterberg H, Vanderstichele H, Vanmechelen E, Bouaziz-Amar E, Blennow K, Hugon J, et al. CSF levels of the BACE1 substrate NRG1 correlate with cognition in Alzheimer's disease. *Alzheimers Res Ther.* 2020;12(1):88. doi:[10.1186/s13195-020-00655-w](https://doi.org/10.1186/s13195-020-00655-w)
106. Chilumuri A, Milton NG. The Role of Neurotransmitters in Protection against Amyloid-  $\beta$  Toxicity by KiSS-1 Overexpression in SH-SY5Y Neurons. *ISRN Neurosci.* 2013;2013:253210. doi:[10.1155/2013/253210](https://doi.org/10.1155/2013/253210)
107. Hishimoto A, Pletnikova O, Lang DL, Troncoso JC, Egan JM, Liu QR. Neurexin 3 transmembrane and soluble isoform expression and splicing haplotype are associated with neuron inflammasome and Alzheimer's disease. *Alzheimers Res Ther.* 2019;11(1):28. doi:[10.1186/s13195-019-0475-2](https://doi.org/10.1186/s13195-019-0475-2)

108. Davidsson P, Bogdanovic N, Lannfelt L, Blennow K. Reduced expression of amyloid precursor protein, presenilin-1 and rab3a in cortical brain regions in Alzheimer's disease. *Dement Geriatr Cogn Disord*. 2001;12(4):243-250. doi:[10.1159/000051266](https://doi.org/10.1159/000051266)
109. Landel V, Millet P, Baranger K, Loriod B, Féron F. Vitamin D interacts with Esr1 and Igf1 to regulate molecular pathways relevant to Alzheimer's disease. *Mol Neurodegener*. 2016;11:22. doi:[10.1186/s13024-016-0087-2](https://doi.org/10.1186/s13024-016-0087-2)
110. Lee JS, Lee Y, André EA, Lee KJ, Nguyen T, Feng Y, Jia N, Harris BT, Burns MP, Pak DTS. Inhibition of Polo-like kinase 2 ameliorates pathogenesis in Alzheimer's disease model mice. *PLoS One*. 2019;14(7):e0219691. doi:[10.1371/journal.pone.0219691](https://doi.org/10.1371/journal.pone.0219691)
111. Chacón PJ, del Marco Á, Arévalo Á, Domínguez-Giménez P, García-Segura LM, Rodríguez-Tébar A. Cerebellin 4, a synaptic protein, enhances inhibitory activity and resistance of neurons to amyloid- $\beta$  toxicity. *Neurobiol Aging*. 2015;36(2):1057-1071. doi:[10.1016/j.neurobiolaging.2014.11.006](https://doi.org/10.1016/j.neurobiolaging.2014.11.006)
112. Pelucchi S, Vandermeulen L, Pizzamiglio L, Aksan B, Yan J, Konietzny A, Bonomi E, Borroni B, Padovani A, Rust MB, et al. Cyclase-associated protein 2 dimerization regulates cofilin in synaptic plasticity and Alzheimer's disease. *Brain Commun*. 2020;2(2):fcaa086. doi:[10.1093/braincomms/fcaa086](https://doi.org/10.1093/braincomms/fcaa086)
113. Detrait E, Maurice T, Hanon E, Leclercq K, Lamberty Y. Lack of synaptic vesicle protein SV2B protects against amyloid- $\beta$ -induced oxidative stress, cholinergic deficit and cognitive impairment in mice. *Behav Brain Res*. 2014;271:277-285. doi:[10.1016/j.bbr.2014.06.013](https://doi.org/10.1016/j.bbr.2014.06.013)
114. Park D, Na M, Kim JA, Lee U, Cho E, Jang M, Chang S. Activation of CaMKIV by soluble amyloid- $\beta$ 1-42 impedes trafficking of axonal vesicles and impairs activity-dependent synaptogenesis. *Sci Signal*. 2017;10(487):eaam8661. doi:[10.1126/scisignal.aam8661](https://doi.org/10.1126/scisignal.aam8661)
115. Cairns NJ, Uryu K, Bigio EH, Mackenzie IR, Gearing M, Duyckaerts C, Yokoo H, Nakazato Y, Jaros E, Perry RH, et al. alpha-Internexin aggregates are abundant in neuronal intermediate filament inclusion disease (NIFID) but rare in other neurodegenerative diseases. *Acta Neuropathol*. 2004;108(3):213-223. doi:[10.1007/s00401-004-0882-7](https://doi.org/10.1007/s00401-004-0882-7)

116. Sandelius Å, Portelius E, Källén Å, Zetterberg H, Rot U, Olsson B, Toledo JB, Shaw LM, Lee VMY, Irwin DJ, et al. Elevated CSF GAP-43 is Alzheimer's disease specific and associated with tau and amyloid pathology. *Alzheimers Dement*. 2019;15(1):55-64. doi:[10.1016/j.jalz.2018.08.006](https://doi.org/10.1016/j.jalz.2018.08.006)
117. Velayudhan L, Killick R, Hye A, Kinsey A, Güntert A, Lynham S, Ward M, Leung R, Lourdusamy A, To AW, et al. Plasma transthyretin as a candidate marker for Alzheimer's disease. *J Alzheimers Dis*. 2012;28(2):369-375. doi:[10.3233/JAD-2011-110611](https://doi.org/10.3233/JAD-2011-110611)
118. Ryu JK, Cho T, Choi HB, Jantaratnotai N, McLarnon JG. Pharmacological antagonism of interleukin-8 receptor CXCR2 inhibits inflammatory reactivity and is neuroprotective in an animal model of Alzheimer's disease. *J Neuroinflammation*. 2015;12:144. doi:[10.1186/s12974-015-0339-z](https://doi.org/10.1186/s12974-015-0339-z)
119. Chen K, Tang Y, Zhao X, Hou C, Li G, Zhang B. Association of IL1R2 rs34043159 with sporadic Alzheimer's disease in southern Han Chinese. *Eur J Neurol*. 2020;27(10):1844-1847. doi:[10.1111/ene.14319](https://doi.org/10.1111/ene.14319)
120. Li H, Wang R. A focus on CXCR4 in Alzheimer's disease. *Brain Circ*. 2017;3(4):199-203. doi:[10.4103/bc.bc\\_13\\_17](https://doi.org/10.4103/bc.bc_13_17)
121. Rivera-Escalera F, Matousek SB, Ghosh S, Olschowka JA, O'Banion MK. Interleukin-1 $\beta$  mediated amyloid plaque clearance is independent of CCR2 signaling in the APP/PS1 mouse model of Alzheimer's disease. *Neurobiol Dis*. 2014;69:124-133. doi:[10.1016/j.nbd.2014.05.018](https://doi.org/10.1016/j.nbd.2014.05.018)
122. Chow N, Bell RD, Deane R, Streb JW, Chen J, Brooks A, Van Nostrand W, Miano JM, Zlokovic BV. Serum response factor and myocardin mediate arterial hypercontractility and cerebral blood flow dysregulation in Alzheimer's phenotype. *Proc Natl Acad Sci U S A*. 2007;104(3):823-828. doi:[10.1073/pnas.0608251104](https://doi.org/10.1073/pnas.0608251104)
123. Shepherd CE, Goyette J, Utter V, Rahimi F, Yang Z, Geczy CL, Halliday GM. Inflammatory S100A9 and S100A12 proteins in Alzheimer's disease. *Neurobiol Aging*. 2006;27(11):1554-1563. doi:[10.1016/j.neurobiolaging.2005.09.033](https://doi.org/10.1016/j.neurobiolaging.2005.09.033)
124. Krauthausen M, Kummer MP, Zimmermann J, Reyes-Irisarri E, Terwel D, Bulic B, Heneka MT, Müller M. CXCR3 promotes plaque formation and behavioral deficits in an Alzheimer's disease model. *J Clin Invest*. 2015;125(1):365-378. doi:[10.1172/JCI66771](https://doi.org/10.1172/JCI66771)

125. Lattanzi R, Maftai D, Petrella C, Pieri M, Sancesario G, Schirinzi T, Bernardini S, Barbato C, Ralli M, Greco A, et al. Involvement of the Chemokine Prokineticin-2 (PROK2) in Alzheimer's Disease: From Animal Models to the Human Pathology. *Cells*. 2019;8(11):1430. doi:[10.3390/cells8111430](https://doi.org/10.3390/cells8111430)
126. Ashutosh, Kou W, Cotter R, Borgmann K, Wu L, Persidsky R, Sakhuja N, Ghorpade A. CXCL8 protects human neurons from amyloid- $\beta$ -induced neurotoxicity: relevance to Alzheimer's disease. *Biochem Biophys Res Commun*. 2011;412(4):565-571. doi:[10.1016/j.bbrc.2011.07.127](https://doi.org/10.1016/j.bbrc.2011.07.127)
127. Lee JK, Bou Dagher J. Regulator of G-protein Signaling (RGS)1 and RGS10 Proteins as Potential Drug Targets for Neuroinflammatory and Neurodegenerative Diseases. *AAPS J*. 2016;18(3):545-549. doi:[10.1208/s12248-016-9883-4](https://doi.org/10.1208/s12248-016-9883-4)
128. Sassi C, Nalls MA, Ridge PG, Gibbs JR, Lupton MK, Troakes C, Lunnon K, Al-Sarraj S, Brown KS, Medway C, et al. Mendelian adult-onset leukodystrophy genes in Alzheimer's disease: critical influence of CSF1R and NOTCH3. *Neurobiol Aging*. 2018;66:179.e17-179.e29. doi:[10.1016/j.neurobiolaging.2018.01.015](https://doi.org/10.1016/j.neurobiolaging.2018.01.015)
129. Hu SJ, Calippe B, Lavalette S, Roubex C, Montassar F, Housset M, Levy O, Delarasse C, Paques M, Sahel JA, et al. Upregulation of P2RX7 in Cx3cr1-Deficient Mononuclear Phagocytes Leads to Increased Interleukin-1 $\beta$  Secretion and Photoreceptor Neurodegeneration. *J Neurosci*. 2015;35(18):6987-6996. doi:[10.1523/JNEUROSCI.3955-14.2015](https://doi.org/10.1523/JNEUROSCI.3955-14.2015)
130. Cheng HC, Sun Y, Lai LC, Chen SY, Lee WC, Chen JH, Chen TF, Chen HH, Wen LL, Yip PK, et al. Genetic polymorphisms of nerve growth factor receptor (NGFR) and the risk of Alzheimer's disease. *J Negat Results Biomed*. 2012;11:5. doi:[10.1186/1477-5751-11-5](https://doi.org/10.1186/1477-5751-11-5)
131. Conte M, Sabbatinelli J, Chiariello A, Martucci M, Santoro A, Monti D, Arcaro M, Galimberti D, Scarpini E, Bonfigli AR, et al. Disease-specific plasma levels of mitokines FGF21, GDF15, and Humanin in type II diabetes and Alzheimer's disease in comparison with healthy aging . *Geroscience*. 2020;10.1007/s11357-020-00287-w. doi:[10.1007/s11357-020-00287-w](https://doi.org/10.1007/s11357-020-00287-w)
132. Mahmoudi R, Feldman S, Kisslerli A, Duret V, Tabary T, Bertholon LA, Badr S, Nonnonhou V, Cesar A, Neuraz A, et al. Inherited and Acquired Decrease in Complement Receptor 1 (CR1) Density on Red Blood Cells



- Associated with High Levels of Soluble CR1 in Alzheimer's Disease. *Int J Mol Sci.* 2018;19(8):2175. doi:[10.3390/ijms19082175](https://doi.org/10.3390/ijms19082175)
133. Horgusluoglu-Moloch E, Nho K, Risacher SL, Kim S, Foroud T, Shaw LM, Trojanowski JQ, Aisen PS, Petersen RC, Jack CR Jr, et al. Targeted neurogenesis pathway-based gene analysis identifies ADORA2A associated with hippocampal volume in mild cognitive impairment and Alzheimer's disease. *Neurobiol Aging.* 2017;60:92-103. doi:[10.1016/j.neurobiolaging.2017.08.010](https://doi.org/10.1016/j.neurobiolaging.2017.08.010)
134. Deng LJ, Cheng C, Wu J, Wang CH, Zhou HB, Huang J. Oxabicycloheptene Sulfonate Protects Against  $\beta$ -Amyloid-induced Toxicity by Activation of PI3K/Akt and ERK Signaling Pathways Via GPER1 in C6 Cells. *Neurochem Res.* 2017;42(8):2246-2256. doi:[10.1007/s11064-017-2237-5](https://doi.org/10.1007/s11064-017-2237-5)
135. Costa AS, Agostini S, Guerini FR, Mancuso R, Clerici M, Pandey JP. Relation between FCGRIIB rs1050501 and HSV-1 specific IgG antibodies in Alzheimer's disease. *J Transl Med.* 2020;18(1):325. doi:[10.1186/s12967-020-02495-6](https://doi.org/10.1186/s12967-020-02495-6)
136. Kaminari A, Tsilibary EC, Tzinia A. A New Perspective in Utilizing MMP-9 as a Therapeutic Target for Alzheimer's Disease and Type 2 Diabetes Mellitus. *J Alzheimers Dis.* 2018;64(1):1-16. doi:[10.3233/JAD-180035](https://doi.org/10.3233/JAD-180035)
137. Gonzalez D, Brandan E. CTGF/CCN2 from Skeletal Muscle to Nervous System: Impact on Neurodegenerative Diseases. *Mol Neurobiol.* 2019;56(8):5911-5916. doi:[10.1007/s12035-019-1490-9](https://doi.org/10.1007/s12035-019-1490-9)
138. Hernandez MX, Jiang S, Cole TA, Chu SH, Fonseca MI, Fang MJ, Hohsfield LA, Torres MD, Green KN, Wetsel RA, et al. Prevention of C5aR1 signaling delays microglial inflammatory polarization, favors clearance pathways and suppresses cognitive loss. *Mol Neurodegener.* 2017;12(1):66. doi:[10.1186/s13024-017-0210-z](https://doi.org/10.1186/s13024-017-0210-z)
139. Hochstrasser T, Marksteiner J, Defrancesco M, Deisenhammer EA, Kemmler G, Humpel C. Two Blood Monocytic Biomarkers (CCL15 and p21) Combined with the Mini-Mental State Examination Discriminate Alzheimer's Disease Patients from Healthy Subjects. *Dement Geriatr Cogn Dis Extra.* 2011;1(1):297-309. doi:[10.1159/000330468](https://doi.org/10.1159/000330468)

140. Lim YW, James D, Huang J, Lee M. The Emerging Role of the RNA-Binding Protein SFPQ in Neuronal Function and Neurodegeneration. *Int J Mol Sci.* 2020;21(19):7151. doi:[10.3390/ijms21197151](https://doi.org/10.3390/ijms21197151)
141. Reinhardt S, Schuck F, Stoye N, Hartmann T, Grimm MOW, Pflugfelder G, Endres K. Transcriptional repression of the ectodomain sheddase ADAM10 by TBX2 and potential implication for Alzheimer's disease. *Cell Mol Life Sci.* 2019;76(5):1005-1025. doi:[10.1007/s00018-018-2998-2](https://doi.org/10.1007/s00018-018-2998-2)
142. Iribarren P, Zhou Y, Hu J, Le Y, Wang JM. Role of formyl peptide receptor-like 1 (FPRL1/FPR2) in mononuclear phagocyte responses in Alzheimer disease. *Immunol Res.* 2005;31(3):165-176. doi:[10.1385/IR:31:3:165](https://doi.org/10.1385/IR:31:3:165)
143. Xia Z, Chibnik LB, Glanz BI, Liguori M, Shulman JM, Tran D, Khoury SJ, Chitnis T, Holyoak T, Weiner HL, et al. A putative Alzheimer's disease risk allele in PCK1 influences brain atrophy in multiple sclerosis. *PLoS One.* 2010;5(11):e14169. doi:[10.1371/journal.pone.0014169](https://doi.org/10.1371/journal.pone.0014169)
144. Ma L, Lu ZN. Role of ADH1B rs1229984 and ALDH2 rs671 gene polymorphisms in the development of Alzheimer's disease. *Genet Mol Res.* 2016;15(4):10.4238/gmr.15048740. doi:[10.4238/gmr.15048740](https://doi.org/10.4238/gmr.15048740)
145. Herrera-Rivero M, Santarelli F, Brosseron F, Kummer MP, Heneka MT. Dysregulation of TLR5 and TAM Ligands in the Alzheimer's Brain as Contributors to Disease Progression. *Mol Neurobiol.* 2019;56(9):6539-6550. doi:[10.1007/s12035-019-1540-3](https://doi.org/10.1007/s12035-019-1540-3)
146. Zhang DF, Fan Y, Xu M, Wang G, Wang D, Li J, Kong LL, Zhou H, Luo R, Bi R, et al. Complement C7 is a novel risk gene for Alzheimer's disease in Han Chinese. *Natl Sci Rev.* 2019;6(2):257-274. doi:[10.1093/nsr/nwy127](https://doi.org/10.1093/nsr/nwy127)
147. Pey P, Pearce RK, Kalaitzakis ME, Griffin WS, Gentleman SM. Phenotypic profile of alternative activation marker CD163 is different in Alzheimer's and Parkinson's disease. *Acta Neuropathol Commun.* 2014;2:21. doi:[10.1186/2051-5960-2-21](https://doi.org/10.1186/2051-5960-2-21)
148. Kantojärvi K, Kotala I, Rehnström K, Ylisaukko-Oja T, Vanhala R, von Wendt TN, von Wendt L, Järvelä I. Fine mapping of Xq11.1-q21.33 and mutation screening of RPS6KA6, ZNF711, ACSL4, DLG3, and



- IL1RAPL2 for autism spectrum disorders (ASD). *Autism Res.* 2011;4(3):228-233. doi:[10.1002/aur.187](https://doi.org/10.1002/aur.187)
149. Zhubi A, Chen Y, Guidotti A, Grayson DR. Epigenetic regulation of RELN and GAD1 in the frontal cortex (FC) of autism spectrum disorder (ASD) subjects. *Int J Dev Neurosci.* 2017;62:63-72. doi:[10.1016/j.ijdevneu.2017.02.003](https://doi.org/10.1016/j.ijdevneu.2017.02.003)
150. Pascolini G, Majore S, Valiante M, Bottillo I, Laino L, Agolini E, Novelli A, Grammatico B, Calvani M, Grammatico P. Autism spectrum disorder in a patient with a genomic rearrangement that only involves the EPHA5 gene. *Psychiatr Genet.* 2019;29(3):86-90. doi:[10.1097/YPG.0000000000000217](https://doi.org/10.1097/YPG.0000000000000217)
151. Sener EF, Cıkılı Uytun M, Korkmaz Bayramov K, Zararsiz G, Oztop DB, Canatan H, Ozkul Y. The roles of CC2D1A and HTR1A gene expressions in autism spectrum disorders. *Metab Brain Dis.* 2016;31(3):613-619. doi:[10.1007/s11011-016-9795-0](https://doi.org/10.1007/s11011-016-9795-0)
152. Sadakata T, Furuichi T. Developmentally regulated Ca<sup>2+</sup>-dependent activator protein for secretion 2 (CAPS2) is involved in BDNF secretion and is associated with autism susceptibility. *Cerebellum.* 2009;8(3):312-322. doi:[10.1007/s12311-009-0097-5](https://doi.org/10.1007/s12311-009-0097-5)
153. Wang L, Li J, Shuang M, Lu T, Wang Z, Zhang T, Yue W, Jia M, Ruan Y, Liu J, et al. Association study and mutation sequencing of genes on chromosome 15q11-q13 identified GABRG3 as a susceptibility gene for autism in Chinese Han population. *Transl Psychiatry.* 2018;8(1):152. doi:[10.1038/s41398-018-0197-4](https://doi.org/10.1038/s41398-018-0197-4)
154. Cappuccio G, Attanasio S, Alagia M, Mutarelli M, Borzone R, Karali M, Genesio R, Mormile A, Nitsch L, Imperati F, et al. Microdeletion of pseudogene chr14.232.a affects LRFN5 expression in cells of a patient with autism spectrum disorder. *Eur J Hum Genet.* 2019;27(9):1475-1480. doi:[10.1038/s41431-019-0430-5](https://doi.org/10.1038/s41431-019-0430-5)
155. Ahmad SF, Ansari MA, Nadeem A, Bakheet SA, Al-Ayadhi LY, Alsaad AMS, Assiri MA, Al-Mazroua HA, Attia SM. Upregulation of interleukin (IL)-31, a cytokine producing CXCR1 peripheral immune cells, contributes to the immune abnormalities of autism spectrum disorder. *J Neuroimmunol.* 2020;349:577430. doi:[10.1016/j.jneuroim.2020.577430](https://doi.org/10.1016/j.jneuroim.2020.577430)

156. Hughes AJ, Dunn KM, Chaffee T, Bhattarai JJ, Beier M. Diagnostic and Clinical Utility of the GAD-2 for Screening Anxiety Symptoms in Individuals With Multiple Sclerosis. *Arch Phys Med Rehabil.* 2018;99(10):2045-2049. doi:[10.1016/j.apmr.2018.05.029](https://doi.org/10.1016/j.apmr.2018.05.029)
157. Cunningham S, O'Doherty C, Patterson C, McDonnell G, Hawkins S, Marrosu MG, Vandebroek K. The neuropeptide genes TAC1, TAC3, TAC4, VIP and PACAP(ADCYAP1), and susceptibility to multiple sclerosis. *J Neuroimmunol.* 2007;183(1-2):208-213. doi:[10.1016/j.jneuroim.2006.11.002](https://doi.org/10.1016/j.jneuroim.2006.11.002)
158. Galuppo M, Giacoppo S, Sessa E, Bramanti P, Mazzon E. Are natural killer cells involved in multiple sclerosis etiology? Evidences from NKp46/NCR1 receptor modulation in an observational study. *J Neurol Sci.* 2014;345(1-2):248-251. doi:[10.1016/j.jns.2014.07.045](https://doi.org/10.1016/j.jns.2014.07.045)
159. Simsek H, Geckin H, Sensoz NP, List EO, Arman A. Association Between IL7R Promoter Polymorphisms and Multiple Sclerosis in Turkish Population. *J Mol Neurosci.* 2019;67(1):38-47. doi:[10.1007/s12031-018-1205-0](https://doi.org/10.1007/s12031-018-1205-0)
160. Scazzone C, Agnello L, Lo Sasso B, Salemi G, Gambino CM, Ragonese P, Candore G, Ciaccio AM, Giglio RV, Bivona G, et al. FOXP3 and GATA3 Polymorphisms, Vitamin D3 and Multiple Sclerosis. *Brain Sci.* 2021;11(4):415. doi:[10.3390/brainsci11040415](https://doi.org/10.3390/brainsci11040415)
161. Yuan M, Wei L, Zhou R, Bai Q, Wei Y, Zhang W, Huang Y. Four FCRL3 Gene Polymorphisms (FCRL3\_3, \_5, \_6, \_8) Confer Susceptibility to Multiple Sclerosis: Results from a Case-Control Study. *Mol Neurobiol.* 2016;53(3):2029-2035. doi:[10.1007/s12035-015-9149-7](https://doi.org/10.1007/s12035-015-9149-7)
162. Gillett A, Thessen Hedreul M, Khademi M, Espinosa A, Beyeen AD, Jagodic M, Kockum I, Harris RA, Olsson T. Interleukin 18 receptor 1 expression distinguishes patients with multiple sclerosis. *Mult Scler.* 2010;16(9):1056-1065. doi:[10.1177/1352458510364634](https://doi.org/10.1177/1352458510364634)
163. Herbert MK, Aerts MB, Beenes M, Norgren N, Esselink RA, Bloem BR, Kuiperij HB, Verbeek MM. CSF Neurofilament Light Chain but not FLT3 Ligand Discriminates Parkinsonian Disorders. *Front Neurol.* 2015;6:91. doi:[10.3389/fneur.2015.00091](https://doi.org/10.3389/fneur.2015.00091)
164. Gao J, Xu H, Weinberg C, Huang X, Park Y, Hollenbeck A, Blair A, Schatzkin A, Burch L, Chen H. An exploratory study on the CHRNA3-

- CHRNA5-CHRNA4 cluster, smoking, and Parkinson's disease. *Neurodegener Dis.* 2011;8(5):296-299. doi:[10.1159/000323190](https://doi.org/10.1159/000323190)
165. Wu DM, Wang S, Wen X, Han XR, Wang YJ, Shen M, Fan SH, Zhuang J, Zhang ZF, Shan Q, et al. Suppression of microRNA-342-3p increases glutamate transporters and prevents dopaminergic neuron loss through activating the Wnt signaling pathway via p21-activated kinase 1 in mice with Parkinson's disease. *J Cell Physiol.* 2019;234(6):9033-9044. doi:[10.1002/jcp.27577](https://doi.org/10.1002/jcp.27577)
166. Bar-Shira A, Gana-Weisz M, Gan-Or Z, Giladi E, Giladi N, Orr-Urtreger A. CHRNA3 c.-57A>G functional promoter change affects Parkinson's disease and smoking. *Neurobiol Aging.* 2014;35(9):2179.e1-2179.e21796. doi:[10.1016/j.neurobiolaging.2014.03.014](https://doi.org/10.1016/j.neurobiolaging.2014.03.014)
167. Kim IY, O'Reilly ÉJ, Hughes KC, Gao X, Schwarzschild MA, McCullough ML, Hannan MT, Betensky RA, Ascherio A. Interaction between caffeine and polymorphisms of glutamate ionotropic receptor NMDA type subunit 2A (GRIN2A) and cytochrome P450 1A2 (CYP1A2) on Parkinson's disease risk. *Mov Disord.* 2018;33(3):414-420. doi:[10.1002/mds.27279](https://doi.org/10.1002/mds.27279)
168. Martinelli S, Cordeddu V, Galosi S, Lanzo A, Palma E, Pannone L, Ciolfi A, Di Nottia M, Rizza T, Bocchinfuso G, et al. Co-occurring WARS2 and CHRNA6 mutations in a child with a severe form of infantile parkinsonism. *Parkinsonism Relat Disord.* 2020;72:75-79. doi:[10.1016/j.parkreldis.2020.02.003](https://doi.org/10.1016/j.parkreldis.2020.02.003)
169. Bäckman CM, Shan L, Zhang Y, Hoffer BJ, Tomac AC. Alterations in prodynorphin, proenkephalin, and GAD67 mRNA levels in the aged human putamen: correlation with Parkinson's disease. *J Neurosci Res.* 2007;85(4):798-804. doi:[10.1002/jnr.21164](https://doi.org/10.1002/jnr.21164)
170. Gao J, Xu H, Weinberg C, Huang X, Park Y, Hollenbeck A, Blair A, Schatzkin A, Burch L, Chen H. An exploratory study on the CHRNA3-CHRNA5-CHRNA4 cluster, smoking, and Parkinson's disease. *Neurodegener Dis.* 2011;8(5):296-299. doi:[10.1159/000323190](https://doi.org/10.1159/000323190)
171. Kaut O, Sharma A, Schmitt I, Wüllner U. DNA methylation of imprinted loci of autosomal chromosomes and IGF2 is not affected in Parkinson's disease patients' peripheral blood mononuclear cells. *Neurol Res.* 2017;39(3):281-284. doi:[10.1080/01616412.2017.1279424](https://doi.org/10.1080/01616412.2017.1279424)

172. Zhu K, Teng J, Zhao J, Liu H, Xie A. Association of TLR9 polymorphisms with sporadic Parkinson's disease in Chinese Han population. *Int J Neurosci.* 2016;126(7):612-616. doi:[10.3109/00207454.2015.1050591](https://doi.org/10.3109/00207454.2015.1050591)
173. Dong Y, Han LL, Xu ZX. Suppressed microRNA-96 inhibits iNOS expression and dopaminergic neuron apoptosis through inactivating the MAPK signaling pathway by targeting CACNG5 in mice with Parkinson's disease. *Mol Med.* 2018;24(1):61. doi:[10.1186/s10020-018-0059-9](https://doi.org/10.1186/s10020-018-0059-9)
174. Kurita H, Yabe S, Ueda T, Inden M, Kakita A, Hozumi I. MicroRNA-5572 Is a Novel MicroRNA-Regulating SLC30A3 in Sporadic Amyotrophic Lateral Sclerosis. *Int J Mol Sci.* 2020;21(12):4482. doi:[10.3390/ijms21124482](https://doi.org/10.3390/ijms21124482)
175. Figlewicz DA, Krizus A, Martinoli MG, Meininger V, Dib M, Rouleau GA, Julien JP. Variants of the heavy neurofilament subunit are associated with the development of amyotrophic lateral sclerosis. *Hum Mol Genet.* 1994;3(10):1757-1761. doi:[10.1093/hmg/3.10.1757](https://doi.org/10.1093/hmg/3.10.1757)
176. Marques RF, Engler JB, Kuchler K, Jones RA, Lingner T, Salinas G, Gillingwater TH, Friese MA, Duncan KE. Motor neuron transcriptome reveals deregulation of SYNGR4 and PLEKHB1 in mutant TDP-43 amyotrophic lateral sclerosis models. *Hum Mol Genet.* 2020;29(16):2647-2661. doi:[10.1093/hmg/ddaa140](https://doi.org/10.1093/hmg/ddaa140)
177. Serrano A, Apolloni S, Rossi S, Lattante S, Sabatelli M, Peric M, Andjus P, Michetti F, Carrì MT, Cozzolino M, et al. The S100A4 Transcriptional Inhibitor Niclosamide Reduces Pro-Inflammatory and Migratory Phenotypes of Microglia: Implications for Amyotrophic Lateral Sclerosis. *Cells.* 2019;8(10):1261. doi:[10.3390/cells8101261](https://doi.org/10.3390/cells8101261)
178. Capponi S, Geuens T, Geroldi A, Origone P, Verdiani S, Cichero E, Adriaenssens E, De Winter V, Bandettini di Poggio M, et al. Molecular Chaperones in the Pathogenesis of Amyotrophic Lateral Sclerosis: The Role of HSPB1. *Hum Mutat.* 2016;37(11):1202-1208. doi:[10.1002/humu.23062](https://doi.org/10.1002/humu.23062)
179. Nicolas A, Kenna KP, Renton AE, Ticozzi N, Faghri F, Chia R, Dominov JA, Kenna BJ, Nalls MA, Keagle P, et al. Genome-wide Analyses Identify KIF5A as a Novel ALS Gene. *Neuron.* 2018;97(6):1268-1283.e6. doi:[10.1016/j.neuron.2018.02.027](https://doi.org/10.1016/j.neuron.2018.02.027)

180. Berto S, Usui N, Konopka G, Fogel BL. ELAVL2-regulated transcriptional and splicing networks in human neurons link neurodevelopment and autism. *Hum Mol Genet.* 2016;25(12):2451-2464. doi:[10.1093/hmg/ddw110](https://doi.org/10.1093/hmg/ddw110)
181. Fernandez-Martos CM, King AE, Atkinson RA, Woodhouse A, Vickers JC. Neurofilament light gene deletion exacerbates amyloid, dystrophic neurite, and synaptic pathology in the APP/PS1 transgenic model of Alzheimer's disease. *Neurobiol Aging.* 2015;36(10):2757-2767. doi:[10.1016/j.neurobiolaging.2015.07.003](https://doi.org/10.1016/j.neurobiolaging.2015.07.003)
182. Dhaeze T, Tremblay L, Lachance C, Peelen E, Zandee S, Grasmuck C, Bourbonnière L, Larouche S, Ayrignac X, Rébillard RM, et al. CD70 defines a subset of proinflammatory and CNS-pathogenic TH1/TH17 lymphocytes and is overexpressed in multiple sclerosis. *Cell Mol Immunol.* 2019;16(7):652-665. doi:[10.1038/s41423-018-0198-5](https://doi.org/10.1038/s41423-018-0198-5)
183. Ye Z, Sun B, Mi X, Xiao Z. Gene co-expression network for analysis of plasma exosomal miRNAs in the elderly as markers of aging and cognitive decline. *PeerJ.* 2020;8:e8318. doi:[10.7717/peerj.8318](https://doi.org/10.7717/peerj.8318)
184. Sala Frigerio C, Lau P, Salta E, Tournoy J, Bossers K, Vandenberghe R, Wallin A, Bjerke M, Zetterberg H, Blennow K, et al. Reduced expression of hsa-miR-27a-3p in CSF of patients with Alzheimer disease. *Neurology.* 2013;81(24):2103-2106. doi:[10.1212/01.wnl.0000437306.37850.22](https://doi.org/10.1212/01.wnl.0000437306.37850.22)
185. Wang Z, Shen L, Wang Y, Huang S. Integrated analysis of miRNA and mRNA expression in the blood of patients with Alzheimer's disease. *Mol Med Rep.* 2020;22(2):1053-1062. doi:[10.3892/mmr.2020.11162](https://doi.org/10.3892/mmr.2020.11162)
186. Nagaraj S, Laskowska-Kaszub K, Dębski KJ, Wojsiat J, Dąbrowski M, Gabryelewicz T, Kuźnicki J, Wojda U. Profile of 6 microRNA in blood plasma distinguish early stage Alzheimer's disease patients from non-demented subjects. *Oncotarget.* 2017;8(10):16122-16143. doi:[10.18632/oncotarget.15109](https://doi.org/10.18632/oncotarget.15109)
187. Northrop A, Byers HA, Radhakrishnan SK. Regulation of NRF1, a master transcription factor of proteasome genes: implications for cancer and neurodegeneration. *Mol Biol Cell.* 2020;31(20):2158-2163. doi:[10.1091/mbc.E20-04-0238](https://doi.org/10.1091/mbc.E20-04-0238)
188. Zhang Z, Li XG, Wang ZH, Song M, Yu SP, Kang SS, Liu X, Zhang Z, Xie M, Liu GP, et al.  $\delta$ -Secretase-cleaved Tau stimulates A $\beta$  production



- via upregulating STAT1-BACE1 signaling in Alzheimer's disease. *Mol Psychiatry*. 2021;26(2):586-603. doi:[10.1038/s41380-018-0286-z](https://doi.org/10.1038/s41380-018-0286-z)
189. Lahiri DK, Ge YW, Rogers JT, Sambamurti K, Greig NH, Maloney B. Taking down the unindicted co-conspirators of amyloid beta-peptide-mediated neuronal death: shared gene regulation of BACE1 and APP genes interacting with CREB, Fe65 and YY1 transcription factors. *Curr Alzheimer Res*. 2006;3(5):475-483. doi:[10.2174/156720506779025224](https://doi.org/10.2174/156720506779025224)
190. Dong YT, Cao K, Xiang J, Shan L, Guan ZZ. Silent Mating-Type Information Regulation 2 Homolog 1 Attenuates the Neurotoxicity Associated with Alzheimer Disease via a Mechanism Which May Involve Regulation of Peroxisome Proliferator-Activated Receptor Gamma Coactivator 1- $\alpha$ . *Am J Pathol*. 2020;190(7):1545-1564. doi:[10.1016/j.ajpath.2020.03.015](https://doi.org/10.1016/j.ajpath.2020.03.015)
191. Rosas I, Martínez C, Coto E, Clarimón J, Lleó A, Illán-Gala I, Dols-Icardo O, Borroni B, Almeida MR, van der Zee J, et al. Genetic variation in APOE, GRN, and TP53 are phenotype modifiers in frontotemporal dementia. *Neurobiol Aging*. 2021;99:99.e15-99.e22. doi:[10.1016/j.neurobiolaging.2020.08.018](https://doi.org/10.1016/j.neurobiolaging.2020.08.018)

## Figures

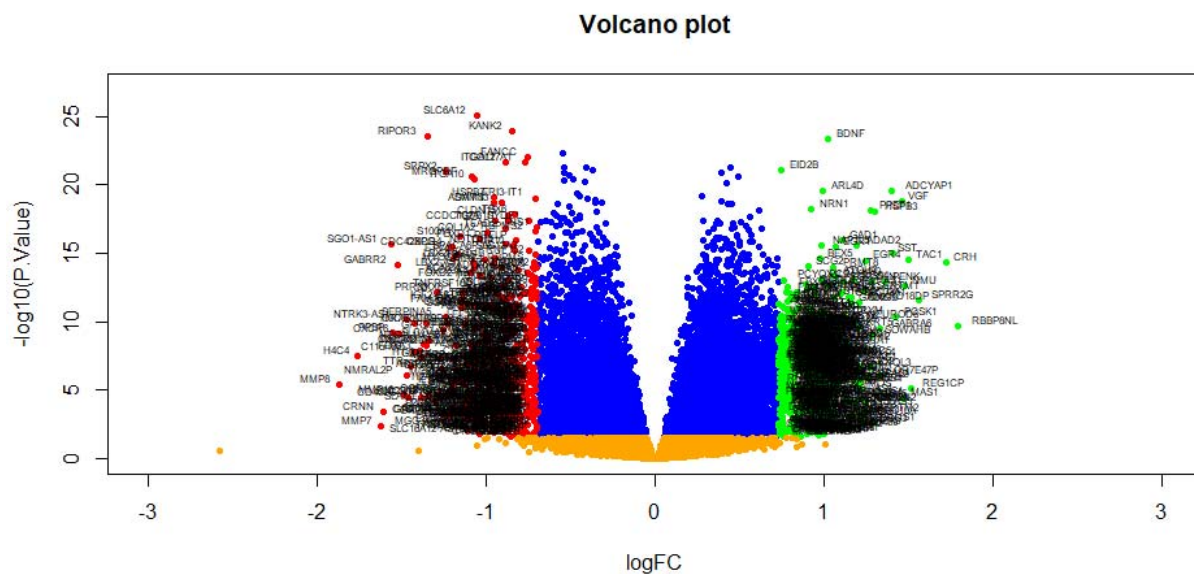



**Fig. 1.** Volcano plot of differentially expressed genes. Genes with a significant change of more than two-fold were selected. Green dot represented up regulated significant genes and red dot represented down regulated significant genes.

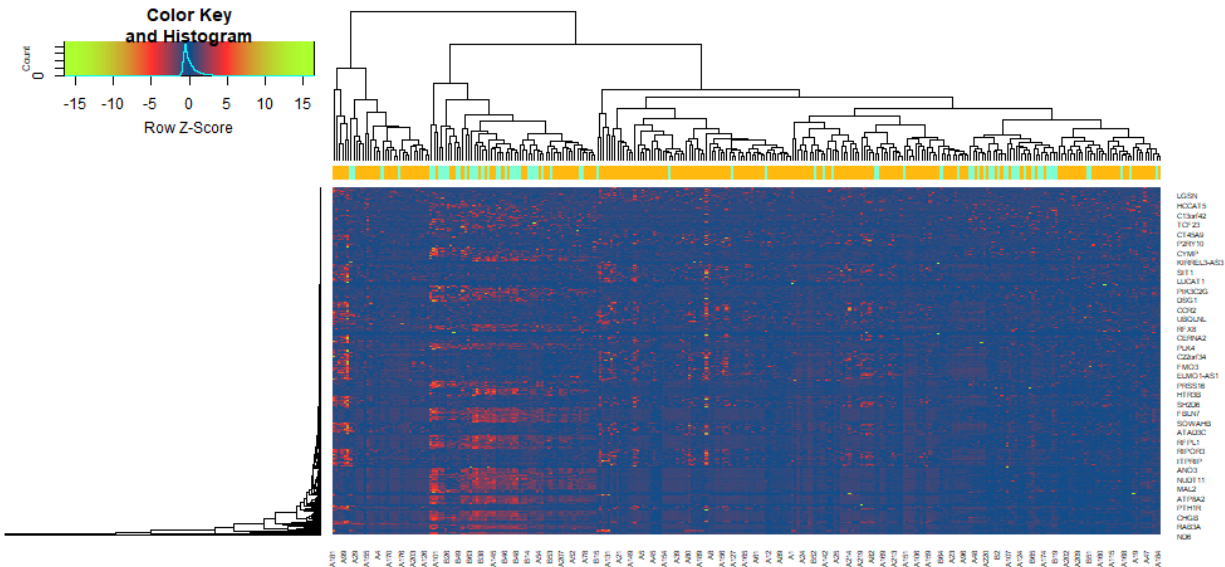

**Fig. 2.** Heat map of differentially expressed genes. Legend on the top left indicate log fold change of genes. (A1 – A219= AD; B1 – B70 = healthy controls)

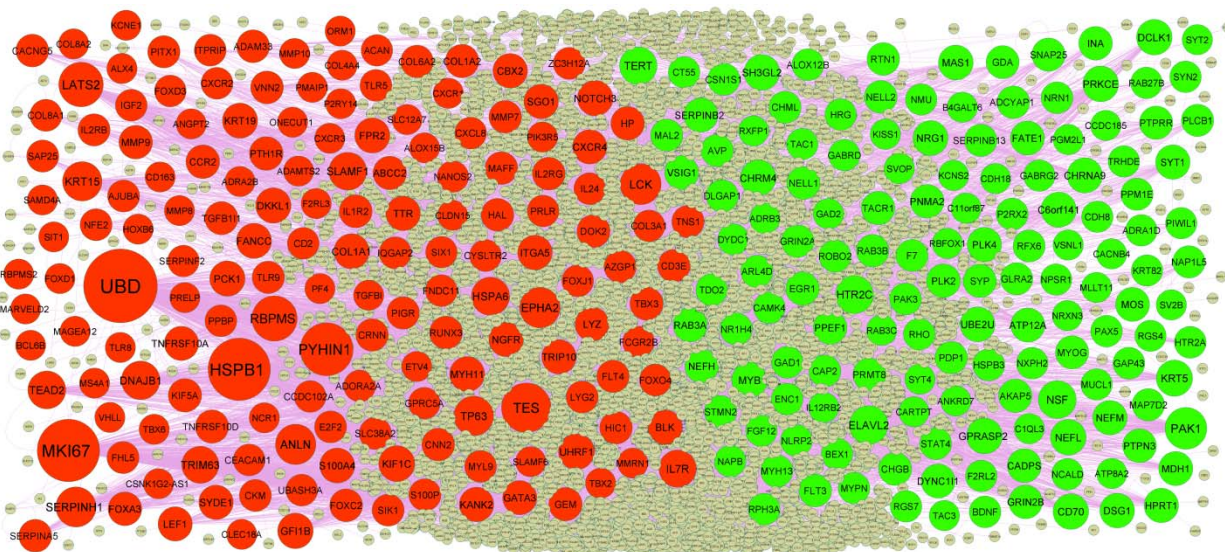

**Fig. 3.** PPI network of DEGs. The PPI network of DEGs was constructed using Cytoscap. Up regulated genes are marked in green; down regulated genes are marked in red

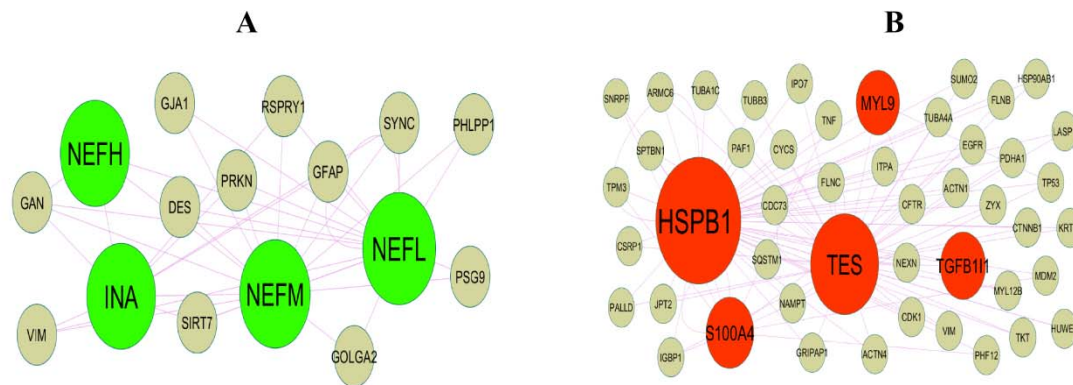

**Fig. 4.** Modules of isolated form PPI of DEGs. (A) The most significant module was obtained from PPI network with 16 nodes and 38 edges for up regulated genes (B) The most significant module was obtained from PPI network with 47 nodes and 96 edges for down regulated genes. Up regulated genes are marked in green; down regulated genes are marked in red.

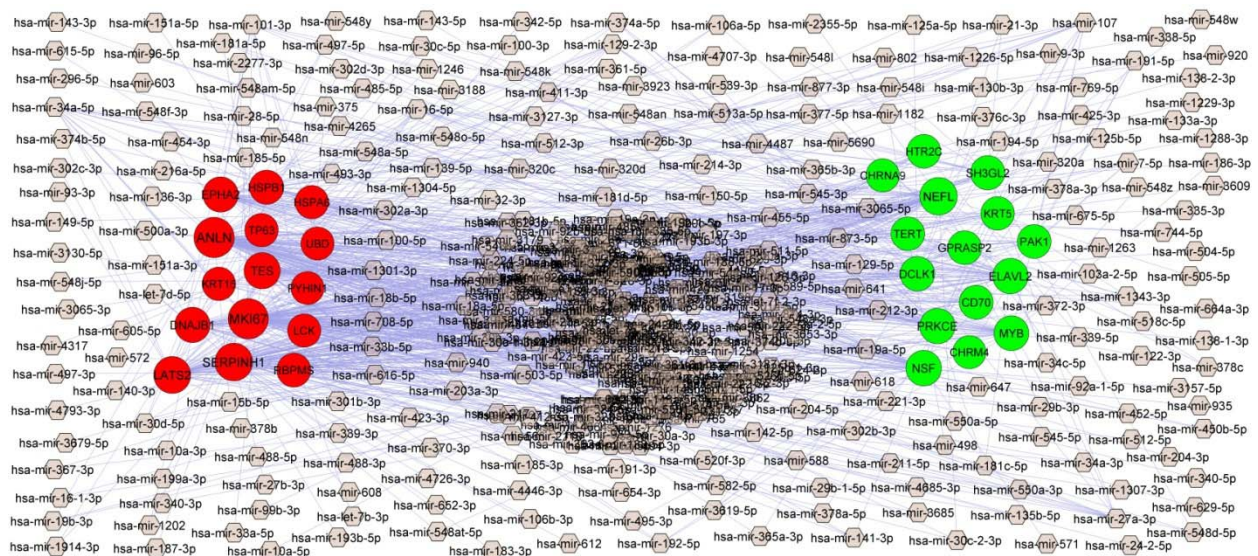

**Fig. 5.** MiRNA - hub gene regulatory network. The purple color diamond nodes represent the key miRNAs; up regulated genes are marked in green; down regulated genes are marked in red.



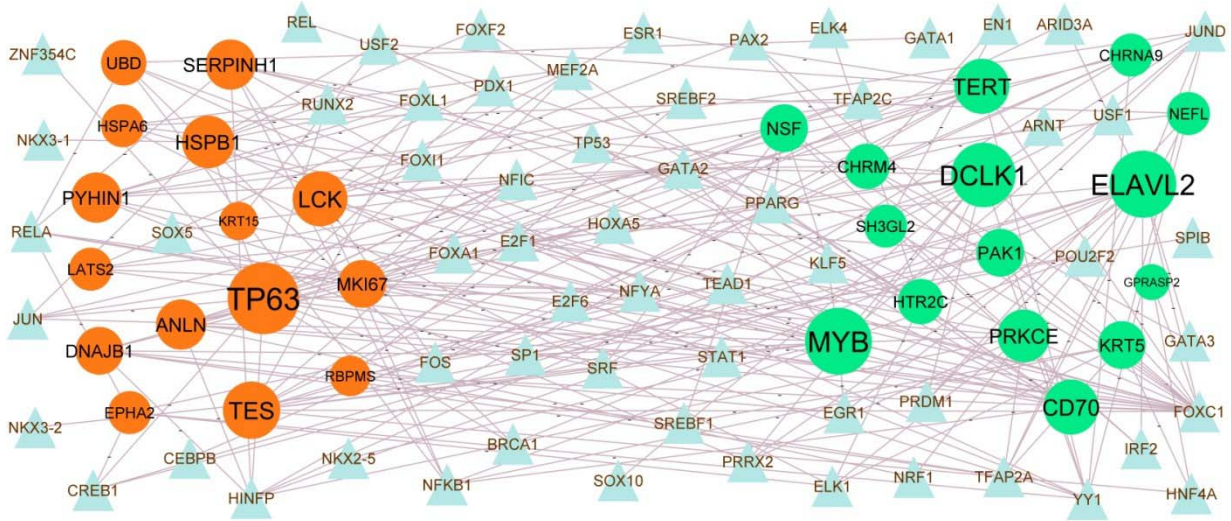

**Fig. 6.** TF - hub gene regulatory network. The blue color triangle nodes represent the key TFs; up regulated genes are marked in green; down regulated genes are marked in red.

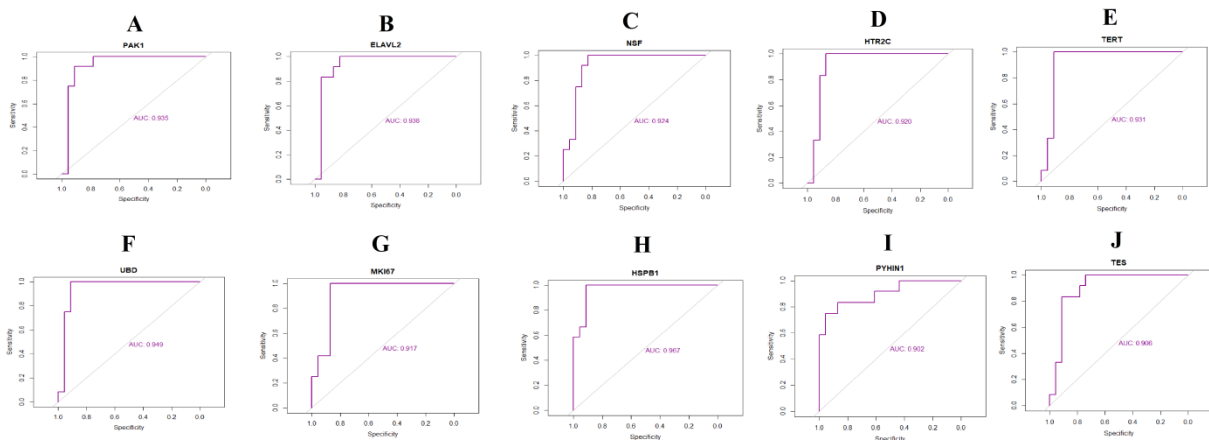

**Fig. 7** ROC curve validated the sensitivity, specificity of hub genes as a predictive biomarker for dementia prognosis. A) PAK1 B) ELAVL2 C) NSF D) HTR2C E) TERT F) UBD G) MKI67 H) HSPB1 I) PYHIN1 J) TES

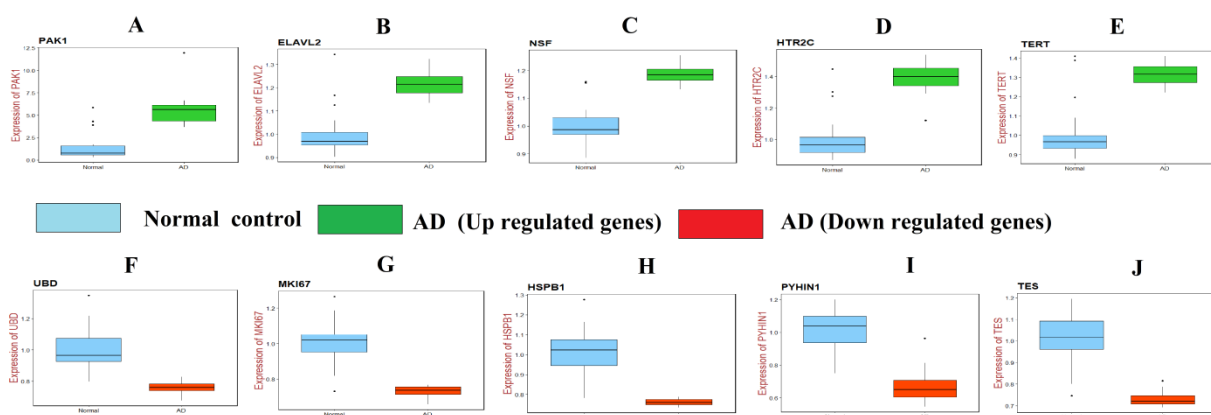

**Fig. 8** Validation of hub genes by RT-PCR. A) PAK1 B) ELAVL2 C) NSF D) HTR2C E) TERT F) UBD G) MKI67 H) HSPB1 I) PYHIN1 J) TES

## Tables

**Table 1.** The sequences of primers for quantitative RT-PCR

| Genes  | Forward Primers         | Reverse Primers         |
|--------|-------------------------|-------------------------|
| PAK1   | CAGCCCTCCGATGAGAAATA    | CAAAACCGACATGAATTGTGTGT |
| ELAVL2 | GTCCAACCACCATAAACAACAAC | GCTCTGCCCTGTTATTTGTCT   |
| NSF    | AAGCGCAAGATGTCCTACAG    | CCACCGATGGATGTGTCTTCA   |
| HTR2C  | CTAATTGGCCTATTGGTTGGCA  | CCACCATCGGAGGTATTGAAAA  |
| TERT   | AAATGCGGCCCTGTTTCT      | CAGTGCCTCTTGAGGAGCA     |
| UBD    | CCGTTCCGAGGAATGGGATTT   | GCCATAAGATGAGAGGCTTCTCC |
| MKI67  | ACGCCTGGTTACTATCAAAGG   | CAGACCCATTTACTTGTGTTGGA |
| HSPB1  | ACGGTCAAGACCAAGGATGG    | AGCGTGATTTCGCGGTGA      |
| PYHIN1 | CCAAGCAACCGTCTCACAG     | GCCGAGTCTGCTTTTGGGA     |
| TES    | ATGGGCTTAGGTCACGAGC     | TCCCACTTTTCGATCCTCTTCA  |

**Table 2** The statistical metrics for key differentially expressed genes (DEGs)

| Gene Symbol | logFC    | pValue   | adj.P.Val | tvalue   | Regulation | Gene name                                                    |
|-------------|----------|----------|-----------|----------|------------|--------------------------------------------------------------|
| RBBP8NL     | 1.792155 | 2.15E-10 | 4.28E-09  | 6.350402 | Up         | RBBP8 N-terminal like                                        |
| CRH         | 1.723255 | 4.45E-15 | 4.89E-13  | 7.841503 | Up         | corticotropin releasing hormone                              |
| SPRR2G      | 1.564456 | 2.45E-12 | 9.42E-11  | 7.00588  | Up         | small proline rich protein 2G                                |
| REG1CP      | 1.513107 | 7.39E-06 | 3.69E-05  | 4.482086 | Up         | regenerating family member 1 gamma, pseudogene               |
| TAC1        | 1.50299  | 3.07E-15 | 3.55E-13  | 7.888171 | Up         | tachykinin precursor 1                                       |
| NMU         | 1.477089 | 2.32E-13 | 1.29E-11  | 7.328947 | Up         | neuromedin U                                                 |
| MAS1        | 1.466607 | 3.77E-05 | 0.000156  | 4.121265 | Up         | MAS1 proto-oncogene, G protein-coupled receptor              |
| VEGF        | 1.45949  | 1.47E-19 | 9.75E-17  | 9.046631 | Up         | VEGF nerve growth factor inducible                           |
| PCSK1       | 1.421549 | 4.06E-11 | 1.02E-09  | 6.601835 | Up         | proproteinconvertasesubtilisin/kexin type 1                  |
| SST         | 1.404689 | 1.01E-15 | 1.45E-13  | 8.025125 | Up         | somatostatin                                                 |
| ADCYAP1     | 1.400453 | 2.56E-20 | 2.34E-17  | 9.236109 | Up         | adenylatecyclase activating polypeptide 1                    |
| PENK        | 1.360921 | 1.16E-13 | 7.07E-12  | 7.421705 | Up         | proenkephalin                                                |
| OR7E47P     | 1.332921 | 8.23E-07 | 5.28E-06  | 4.929926 | Up         | olfactory receptor family 7 subfamily E member 47 pseudogene |
| GABRA6      | 1.326971 | 3.39E-10 | 6.24E-09  | 6.279742 | Up         | gamma-aminobutyric acid type A receptor subunit alpha6       |

|           |          |          |          |          |    |                                                                 |
|-----------|----------|----------|----------|----------|----|-----------------------------------------------------------------|
| HSPB3     | 1.300949 | 9.39E-19 | 4.58E-16 | 8.842146 | Up | heat shock protein family B (small) member 3                    |
| SLN       | 1.283622 | 1.20E-13 | 7.33E-12 | 7.416601 | Up | sarcolipin                                                      |
| SOWAHB    | 1.280945 | 1.03E-09 | 1.60E-08 | 6.10543  | Up | sosondawahankyrin repeat domain family member B                 |
| DSG3      | 1.28065  | 0.002644 | 0.006733 | 3.006337 | Up | desmoglein 3                                                    |
| C1QL3     | 1.275145 | 2.03E-07 | 1.52E-06 | 5.196433 | Up | complement C1q like 3                                           |
| PPEF1     | 1.274206 | 7.62E-19 | 3.96E-16 | 8.865398 | Up | protein phosphatase with EF-hand domain 1                       |
| NPAS4     | 1.256782 | 1.24E-06 | 7.60E-06 | 4.84915  | Up | neuronal PAS domain protein 4                                   |
| OR52N2    | 1.24645  | 7.69E-05 | 0.000292 | 3.953898 | Up | olfactory receptor family 52 subfamily N member 2               |
| EGR4      | 1.245746 | 3.33E-15 | 3.78E-13 | 7.877942 | Up | early growth response 4                                         |
| SERTM1    | 1.240042 | 5.40E-13 | 2.63E-11 | 7.214786 | Up | serine rich and transmembrane domain containing 1               |
| SERTM2    | 1.236927 | 0.000444 | 0.001389 | 3.512644 | Up | serine rich and transmembrane domain containing 2               |
| CSN1S1    | 1.236875 | 0.002004 | 0.005264 | 3.089583 | Up | casein alpha s1                                                 |
| MUC15     | 1.220349 | 4.35E-05 | 0.000176 | 4.088296 | Up | mucin 15, cell surface associated                               |
| MOS       | 1.217979 | 6.69E-06 | 3.36E-05 | 4.503362 | Up | MOS proto-oncogene, serine/threonine kinase                     |
| SI        | 1.216882 | 0.001498 | 0.004059 | 3.175165 | Up | sucrase-isomaltase                                              |
| GJD2      | 1.211457 | 1.62E-07 | 1.24E-06 | 5.23787  | Up | gap junction protein delta 2                                    |
| GSG1L2    | 1.210676 | 1.66E-06 | 9.77E-06 | 4.791418 | Up | GSG1 like 2                                                     |
| NPSR1     | 1.207645 | 3.37E-06 | 1.83E-05 | 4.647064 | Up | neuropeptide S receptor 1                                       |
| KRT5      | 1.204534 | 2.37E-10 | 4.65E-09 | 6.335059 | Up | keratin 5                                                       |
| CHGB      | 1.204116 | 3.65E-12 | 1.33E-10 | 6.949939 | Up | chromogranin B                                                  |
| ADAD2     | 1.193409 | 2.50E-16 | 4.39E-14 | 8.195177 | Up | adenosine deaminase domain containing 2                         |
| ABRA      | 1.190391 | 3.76E-07 | 2.63E-06 | 5.080655 | Up | actin binding Rho activating protein                            |
| C4orf54   | 1.185335 | 3.31E-06 | 1.80E-05 | 4.650848 | Up | chromosome 4 open reading frame 54                              |
| PNMA6A    | 1.181083 | 8.30E-05 | 0.000312 | 3.935645 | Up | PNMA family member 6A                                           |
| NEUROD6   | 1.172833 | 7.58E-11 | 1.75E-09 | 6.508686 | Up | neuronal differentiation 6                                      |
| RGS4      | 1.172806 | 1.06E-13 | 6.57E-12 | 7.433827 | Up | regulator of G protein signaling 4                              |
| WFDC10A   | 1.165912 | 0.000749 | 0.002204 | 3.371031 | Up | WAP four-disulfide core domain 10A                              |
| CWH43     | 1.165094 | 0.000615 | 0.001854 | 3.424724 | Up | cell wall biogenesis 43 C-terminal homolog                      |
| KRT82     | 1.160963 | 8.82E-05 | 0.000329 | 3.921013 | Up | keratin 82                                                      |
| SLC32A1   | 1.160424 | 1.71E-12 | 6.96E-11 | 7.056381 | Up | solute carrier family 32 member 1                               |
| IL1RAPL2  | 1.159802 | 7.57E-05 | 0.000289 | 3.957525 | Up | interleukin 1 receptor accessory protein like 2                 |
| GAD2      | 1.158021 | 3.98E-12 | 1.43E-10 | 6.937909 | Up | glutamate decarboxylase 2                                       |
| ANKRD18DP | 1.152965 | 3.46E-12 | 1.28E-10 | 6.95756  | Up | ankyrin repeat domain 18D, pseudogene                           |
| CAPZA3    | 1.151592 | 0.003936 | 0.009522 | 2.883259 | Up | capping actin protein of muscle Z-line subunit alpha 3          |
| GRP       | 1.141596 | 1.73E-12 | 7.04E-11 | 7.054306 | Up | gastrin releasing peptide                                       |
| CHRNA9    | 1.13746  | 3.87E-05 | 0.000159 | 4.114852 | Up | cholinergic receptor nicotinic alpha 9 subunit                  |
| ACTL8     | 1.134624 | 1.38E-06 | 8.33E-06 | 4.827436 | Up | actin like 8                                                    |
| NXPH2     | 1.131891 | 2.93E-09 | 3.96E-08 | 5.935607 | Up | neurexophilin 2                                                 |
| C14orf39  | 1.124348 | 0.005002 | 0.011731 | 2.806924 | Up | chromosome 14 open reading frame 39                             |
| EGR3      | 1.114913 | 1.21E-13 | 7.35E-12 | 7.415901 | Up | early growth response 3                                         |
| CRYM      | 1.114406 | 3.53E-11 | 9.10E-10 | 6.622406 | Up | crystallin mu                                                   |
| SCHLAP1   | 1.114037 | 6.76E-05 | 0.000261 | 3.984639 | Up | SWI/SNF complex antagonist associated with prostate cancer<br>1 |

|             |          |          |          |          |    |                                                               |
|-------------|----------|----------|----------|----------|----|---------------------------------------------------------------|
| CCNYL4      | 1.1091   | 3.62E-08 | 3.40E-07 | 5.508481 | Up | cyclin Y like 4 (pseudogene)                                  |
| PNOC        | 1.108493 | 7.24E-13 | 3.40E-11 | 7.174869 | Up | prepronociceptin                                              |
| GAD1        | 1.107448 | 1.07E-16 | 2.18E-14 | 8.297185 | Up | glutamate decarboxylase 1                                     |
| CXCL11      | 1.10341  | 9.47E-07 | 5.99E-06 | 4.90229  | Up | C-X-C motif chemokine ligand 11                               |
| FREM3       | 1.102409 | 8.15E-08 | 6.85E-07 | 5.363685 | Up | FRAS1 related extracellular matrix 3                          |
| C17orf102   | 1.101675 | 9.39E-13 | 4.22E-11 | 7.1392   | Up | chromosome 17 open reading frame 102                          |
| DRGX        | 1.099711 | 0.005153 | 0.012039 | 2.797291 | Up | dorsal root ganglia homeobox                                  |
| CLEC4F      | 1.094546 | 2.56E-06 | 1.43E-05 | 4.703626 | Up | C-type lectin domain family 4 member F                        |
| CTXN3       | 1.084705 | 1.52E-09 | 2.24E-08 | 6.042531 | Up | cortexin 3                                                    |
| HDC         | 1.078277 | 2.54E-09 | 3.49E-08 | 5.959084 | Up | histidine decarboxylase                                       |
| GABRA1      | 1.070151 | 6.01E-09 | 7.22E-08 | 5.816533 | Up | gamma-aminobutyric acid type A receptor subunit alpha 1       |
| EGR1        | 1.067688 | 3.11E-16 | 5.17E-14 | 8.168916 | Up | early growth response 1                                       |
| C3orf80     | 1.067379 | 4.87E-14 | 3.50E-12 | 7.535299 | Up | chromosome 3 open reading frame 80                            |
| PCDH8       | 1.066795 | 2.50E-08 | 2.47E-07 | 5.573399 | Up | protocadherin 8                                               |
| PVALB       | 1.06419  | 4.39E-06 | 2.31E-05 | 4.592051 | Up | parvalbumin                                                   |
| PLSCR5      | 1.06302  | 0.002759 | 0.006987 | 2.993373 | Up | phospholipid scramblase family member 5                       |
| STAT4       | 1.061542 | 1.51E-12 | 6.32E-11 | 7.073489 | Up | signal transducer and activator of transcription 4            |
| OLFM3       | 1.05809  | 3.37E-08 | 3.19E-07 | 5.521089 | Up | olfactomedin 3                                                |
| FAM47C      | 1.054309 | 0.000879 | 0.002537 | 3.326739 | Up | family with sequence similarity 47 member C                   |
| ATOH7       | 1.053408 | 4.33E-14 | 3.17E-12 | 7.550581 | Up | atonal bHLH transcription factor 7                            |
| PRMT8       | 1.052567 | 1.17E-14 | 1.06E-12 | 7.71945  | Up | protein arginine methyltransferase 8                          |
| KCNV1       | 1.05243  | 4.01E-09 | 5.17E-08 | 5.883803 | Up | potassium voltage-gated channel modifier subfamily V member 1 |
| TDO2        | 1.050395 | 2.03E-08 | 2.06E-07 | 5.609836 | Up | tryptophan 2,3-dioxygenase                                    |
| CALB1       | 1.050333 | 3.89E-09 | 5.04E-08 | 5.888779 | Up | calbindin 1                                                   |
| OVOS2       | 1.048457 | 1.72E-08 | 1.80E-07 | 5.637677 | Up | alpha-2-macroglobulin like 1 pseudogene                       |
| AMELX       | 1.048424 | 0.003178 | 0.007908 | 2.949998 | Up | amelogenin X-linked                                           |
| ANKRD62     | 1.044304 | 3.14E-05 | 0.000132 | 4.163275 | Up | ankyrin repeat domain 62                                      |
| WNT8A       | 1.042288 | 9.31E-10 | 1.48E-08 | 6.120858 | Up | Wnt family member 8A                                          |
| EFCAB3      | 1.042265 | 0.000303 | 0.000987 | 3.6127   | Up | EF-hand calcium binding domain 3                              |
| CBLN4       | 1.040513 | 3.41E-08 | 3.22E-07 | 5.518871 | Up | cerebellin 4 precursor                                        |
| MYOG        | 1.037877 | 2.82E-07 | 2.04E-06 | 5.135063 | Up | myogenin                                                      |
| C13orf42    | 1.035355 | 0.005916 | 0.013606 | 2.752395 | Up | chromosome 13 open reading frame 42                           |
| CCDC196     | 1.035158 | 0.000916 | 0.002633 | 3.315008 | Up | coiled-coil domain containing 196                             |
| MS4A8       | 1.033714 | 2.42E-06 | 1.36E-05 | 4.715149 | Up | membrane spanning 4-domains A8                                |
| KIRREL3-AS3 | 1.031608 | 0.000173 | 0.000598 | 3.756    | Up | KIRREL3 antisense RNA 3                                       |
| TEX26-AS1   | 1.029183 | 8.43E-08 | 7.05E-07 | 5.357708 | Up | TEX26 antisense RNA 1                                         |
| SYP-AS1     | 1.026727 | 4.49E-07 | 3.08E-06 | 5.046805 | Up | SYP antisense RNA 1                                           |
| DCTN1-AS1   | 1.023243 | 2.56E-13 | 1.40E-11 | 7.315949 | Up | DCTN1 antisense RNA 1                                         |
| BDNF        | 1.022065 | 4.31E-24 | 2.63E-20 | 10.12433 | Up | brain derived neurotrophic factor                             |
| SPATA48     | 1.018411 | 0.000653 | 0.001951 | 3.408589 | Up | spermatogenesis associated 48                                 |
| ANKRD33     | 1.018068 | 8.75E-05 | 0.000327 | 3.92279  | Up | ankyrin repeat domain 33                                      |
| GABRG2      | 1.016224 | 6.43E-08 | 5.55E-07 | 5.406467 | Up | gamma-aminobutyric acid type A receptor subunit gamma2        |



|            |          |          |          |          |    |                                                                          |
|------------|----------|----------|----------|----------|----|--------------------------------------------------------------------------|
| CD70       | 1.015253 | 2.55E-05 | 0.00011  | 4.210264 | Up | CD70 molecule                                                            |
| ROBO2      | 1.008347 | 2.54E-10 | 4.92E-09 | 6.324275 | Up | roundabout guidance receptor 2                                           |
| TPH2       | 1.005576 | 7.25E-06 | 3.63E-05 | 4.486126 | Up | tryptophan hydroxylase 2                                                 |
| ERICH3-AS1 | 1.00524  | 2.79E-05 | 0.00012  | 4.189763 | Up | ERICH3 antisense RNA 1                                                   |
| FLT3       | 1.005056 | 1.10E-07 | 8.89E-07 | 5.308631 | Up | fms related receptor tyrosine kinase 3                                   |
| UBE2U      | 1.004904 | 0.000159 | 0.000557 | 3.776266 | Up | ubiquitin conjugating enzyme E2 U                                        |
| CHRNA4     | 1.004005 | 0.000529 | 0.001626 | 3.465596 | Up | cholinergic receptor nicotinic beta 4 subunit                            |
| PART1      | 1.002783 | 3.50E-11 | 9.04E-10 | 6.62389  | Up | prostate androgen-regulated transcript 1                                 |
| SVOP       | 0.999571 | 1.91E-11 | 5.44E-10 | 6.712665 | Up | SV2 related protein                                                      |
| SLC5A7     | 0.999569 | 0.014403 | 0.029714 | 2.447058 | Up | solute carrier family 5 member 7                                         |
| PIK3C2G    | 0.998847 | 2.44E-06 | 1.37E-05 | 4.713389 | Up | phosphatidylinositol-4-phosphate 3-kinase catalytic subunit type 2 gamma |
| KCNK18     | 0.997672 | 0.012251 | 0.025798 | 2.504829 | Up | potassium two pore domain channel subfamily K member 18                  |
| IQCJ       | 0.992878 | 2.42E-06 | 1.36E-05 | 4.714906 | Up | IQ motif containing J                                                    |
| STYK1      | 0.992545 | 2.14E-08 | 2.17E-07 | 5.599941 | Up | serine/threonine/tyrosine kinase 1                                       |
| HTR2C      | 0.989166 | 5.69E-07 | 3.80E-06 | 5.001507 | Up | 5-hydroxytryptamine receptor 2C                                          |
| ARL4D      | 0.988673 | 2.58E-20 | 2.34E-17 | 9.234915 | Up | ADP ribosylation factor like GTPase 4D                                   |
| NAP1L5     | 0.985169 | 2.87E-16 | 4.87E-14 | 8.178551 | Up | nucleosome assembly protein 1 like 5                                     |
| ADGRF2     | 0.984019 | 0.000289 | 0.000945 | 3.625412 | Up | adhesion G protein-coupled receptor F2                                   |
| CDH7       | 0.983533 | 3.61E-05 | 0.00015  | 4.130886 | Up | cadherin 7                                                               |
| TCP11      | 0.981913 | 3.51E-08 | 3.30E-07 | 5.513967 | Up | t-complex 11                                                             |
| PCP4       | 0.980196 | 7.90E-14 | 5.24E-12 | 7.471999 | Up | Purkinje cell protein 4                                                  |
| TERT       | 0.980011 | 5.09E-06 | 2.63E-05 | 4.561017 | Up | telomerase reverse transcriptase                                         |
| BEX5       | 0.978943 | 2.45E-15 | 3.05E-13 | 7.915997 | Up | brain expressed X-linked 5                                               |
| NEFL       | 0.9786   | 1.83E-09 | 2.64E-08 | 6.012007 | Up | neurofilament light                                                      |
| MLIP       | 0.978387 | 1.99E-11 | 5.62E-10 | 6.706744 | Up | muscular LMNA interacting protein                                        |
| SOSTDC1    | 0.97708  | 3.45E-07 | 2.44E-06 | 5.097088 | Up | sclerostin domain containing 1                                           |
| INTS6L-AS1 | 0.975855 | 1.68E-05 | 7.66E-05 | 4.303637 | Up | INTS6L antisense RNA 1                                                   |
| SNAP25     | 0.97474  | 1.26E-09 | 1.90E-08 | 6.072715 | Up | synaptosome associated protein 25                                        |
| RAB3B      | 0.971743 | 3.59E-10 | 6.54E-09 | 6.271061 | Up | RAB3B, member RAS oncogene family                                        |
| TCF23      | 0.970766 | 0.020699 | 0.040846 | 2.313424 | Up | transcription factor 23                                                  |
| SNTN       | 0.968452 | 0.001376 | 0.003768 | 3.199714 | Up | sentan, cilia apical structure protein                                   |
| NYAP2      | 0.968344 | 2.42E-05 | 0.000106 | 4.221754 | Up | neuronal tyrosine-phosphorylated phosphoinositide-3-kinase adaptor 2     |
| RAB27B     | 0.967279 | 9.16E-08 | 7.54E-07 | 5.342678 | Up | RAB27B, member RAS oncogene family                                       |
| OR1N1      | 0.96601  | 0.01512  | 0.030977 | 2.429486 | Up | olfactory receptor family 1 subfamily N member 1                         |
| MUCL1      | 0.965921 | 1.75E-06 | 1.02E-05 | 4.780546 | Up | mucin like 1                                                             |
| RXFP3      | 0.963798 | 0.014225 | 0.029419 | 2.451539 | Up | relaxin family peptide receptor 3                                        |
| SATB2-AS1  | 0.96374  | 1.65E-09 | 2.40E-08 | 6.02931  | Up | SATB2 antisense RNA 1                                                    |
| MYPN       | 0.957798 | 0.000297 | 0.000969 | 3.618314 | Up | myopalladin                                                              |
| CYP4A11    | 0.957237 | 9.73E-07 | 6.13E-06 | 4.897036 | Up | cytochrome P450 family 4 subfamily A member 11                           |
| SUN3       | 0.95643  | 2.97E-07 | 2.14E-06 | 5.125412 | Up | Sad1 and UNC84 domain containing 3                                       |
| GDA        | 0.950478 | 1.53E-09 | 2.25E-08 | 6.041671 | Up | guanine deaminase                                                        |
| GREM2      | 0.947377 | 5.17E-10 | 8.97E-09 | 6.213978 | Up | gremlin 2, DAN family BMP antagonist                                     |

|         |          |          |          |          |    |                                                               |
|---------|----------|----------|----------|----------|----|---------------------------------------------------------------|
| UNC5D   | 0.944438 | 3.29E-10 | 6.07E-09 | 6.284642 | Up | unc-5 netrin receptor D                                       |
| CREG2   | 0.944388 | 2.33E-07 | 1.71E-06 | 5.171094 | Up | cellular repressor of E1A stimulated genes 2                  |
| ERICH6B | 0.94413  | 0.004502 | 0.010706 | 2.840697 | Up | glutamate rich 6B                                             |
| RPH3A   | 0.943871 | 7.81E-13 | 3.60E-11 | 7.164518 | Up | rabphilin 3A                                                  |
| CNTN5   | 0.942573 | 4.52E-07 | 3.10E-06 | 5.045602 | Up | contactin 5                                                   |
| GABRB2  | 0.939695 | 1.42E-06 | 8.51E-06 | 4.822515 | Up | gamma-aminobutyric acid type A receptor subunit beta2         |
| MAL2    | 0.938674 | 2.03E-08 | 2.07E-07 | 5.609631 | Up | mal, T cell differentiation protein 2                         |
| ZCCHC12 | 0.93839  | 8.18E-11 | 1.87E-09 | 6.497161 | Up | zinc finger CCHC-type containing 12                           |
| NLRP2   | 0.937784 | 7.45E-08 | 6.33E-07 | 5.380024 | Up | NLR family pyrin domain containing 2                          |
| FRMPD2B | 0.937148 | 1.44E-10 | 3.04E-09 | 6.411959 | Up | FERM and PDZ domain containing 2B, pseudogene                 |
| AGBL4   | 0.936178 | 2.62E-13 | 1.43E-11 | 7.31269  | Up | ATP/GTP binding protein like 4                                |
| PTPRR   | 0.934759 | 5.28E-09 | 6.50E-08 | 5.838145 | Up | protein tyrosine phosphatase receptor type R                  |
| RFX6    | 0.93464  | 4.62E-05 | 0.000186 | 4.074225 | Up | regulatory factor X6                                          |
| CDH18   | 0.934539 | 4.09E-10 | 7.32E-09 | 6.250537 | Up | cadherin 18                                                   |
| TACR1   | 0.933255 | 2.05E-11 | 5.74E-10 | 6.702554 | Up | tachykinin receptor 1                                         |
| KCNG3   | 0.932517 | 1.14E-07 | 9.12E-07 | 5.302803 | Up | potassium voltage-gated channel modifier subfamily G member 3 |
| FBLN7   | 0.932076 | 1.46E-11 | 4.37E-10 | 6.751391 | Up | fibulin 7                                                     |
| CARTPT  | 0.931108 | 1.00E-06 | 6.28E-06 | 4.891557 | Up | CART prepropeptide                                            |
| ALOX12B | 0.930558 | 3.58E-10 | 6.53E-09 | 6.271334 | Up | arachidonate 12-lipoxygenase, 12R type                        |
| CCDC105 | 0.929791 | 0.007671 | 0.017095 | 2.666235 | Up | coiled-coil domain containing 105                             |
| SPTSSB  | 0.929526 | 1.66E-10 | 3.44E-09 | 6.389594 | Up | serine palmitoyltransferase small subunit B                   |
| AMY2A   | 0.929227 | 4.13E-06 | 2.19E-05 | 4.604952 | Up | amylase alpha 2A                                              |
| MCHR1   | 0.924109 | 2.11E-10 | 4.21E-09 | 6.353393 | Up | melanin concentrating hormone receptor 1                      |
| NRN1    | 0.923459 | 5.87E-19 | 3.11E-16 | 8.89451  | Up | neurtin 1                                                     |
| KCNS2   | 0.92343  | 3.87E-09 | 5.02E-08 | 5.889649 | Up | potassium voltage-gated channel modifier subfamily S member 2 |
| YY1P2   | 0.922952 | 0.013143 | 0.027465 | 2.479877 | Up | YY1 transcription factor pseudogene 2                         |
| SLC17A6 | 0.922759 | 1.03E-06 | 6.46E-06 | 4.885102 | Up | solute carrier family 17 member 6                             |
| RAB3C   | 0.921229 | 1.49E-09 | 2.20E-08 | 6.045659 | Up | RAB3C, member RAS oncogene family                             |
| SLC4A10 | 0.92009  | 1.86E-06 | 1.08E-05 | 4.768439 | Up | solute carrier family 4 member 10                             |
| AFP     | 0.919009 | 2.07E-05 | 9.20E-05 | 4.256686 | Up | alpha fetoprotein                                             |
| HRG     | 0.918231 | 0.000358 | 0.001146 | 3.569348 | Up | histidine rich glycoprotein                                   |
| GPR22   | 0.918097 | 5.56E-07 | 3.73E-06 | 5.005804 | Up | G protein-coupled receptor 22                                 |
| NEFM    | 0.91801  | 3.36E-08 | 3.18E-07 | 5.52153  | Up | neurofilament medium                                          |
| SYT1    | 0.91656  | 5.76E-09 | 6.98E-08 | 5.823483 | Up | synaptotagmin 1                                               |
| EPHA5   | 0.914525 | 2.17E-07 | 1.61E-06 | 5.183944 | Up | EPH receptor A5                                               |
| MSX2P1  | 0.913053 | 9.17E-07 | 5.82E-06 | 4.90863  | Up | mshhomeobox 2 pseudogene 1                                    |
| OR2AE1  | 0.912044 | 0.010487 | 0.022507 | 2.559343 | Up | olfactory receptor family 2 subfamily AE member 1             |
| PARM1   | 0.91119  | 6.57E-10 | 1.10E-08 | 6.176127 | Up | prostate androgen-regulated mucin-like protein 1              |
| GLP2R   | 0.910394 | 8.86E-07 | 5.65E-06 | 4.915458 | Up | glucagon like peptide 2 receptor                              |
| CDH9    | 0.910322 | 6.71E-08 | 5.76E-07 | 5.398892 | Up | cadherin 9                                                    |
| STARD6  | 0.907602 | 0.000134 | 0.000478 | 3.818379 | Up | StAR related lipid transfer domain containing 6               |
| CYP24A1 | 0.906744 | 1.35E-06 | 8.17E-06 | 4.83206  | Up | cytochrome P450 family 24 subfamily A member 1                |

|             |          |          |          |          |    |                                                                         |
|-------------|----------|----------|----------|----------|----|-------------------------------------------------------------------------|
| HTR3B       | 0.906486 | 8.43E-08 | 7.05E-07 | 5.357589 | Up | 5-hydroxytryptamine receptor 3B                                         |
| C8orf89     | 0.90642  | 7.82E-05 | 0.000296 | 3.949981 | Up | chromosome 8 open reading frame 89                                      |
| GLRA3       | 0.906045 | 4.26E-05 | 0.000173 | 4.092805 | Up | glycine receptor alpha 3                                                |
| SCG2        | 0.905705 | 9.28E-15 | 8.96E-13 | 7.748698 | Up | secretogranin II                                                        |
| HPRT1       | 0.904017 | 9.15E-12 | 2.92E-10 | 6.819211 | Up | hypoxanthine phosphoribosyltransferase 1                                |
| SERPINA11   | 0.904017 | 0.013108 | 0.027399 | 2.480821 | Up | serpin family A member 11                                               |
| MEPE        | 0.902128 | 8.87E-07 | 5.65E-06 | 4.915184 | Up | matrix extracellular phosphoglycoprotein                                |
| DEPDC1-AS1  | 0.90096  | 0.003069 | 0.007673 | 2.96077  | Up | DEPDC1 antisense RNA 1                                                  |
| SYT4        | 0.900419 | 1.15E-08 | 1.26E-07 | 5.707159 | Up | synaptotagmin 4                                                         |
| C5orf52     | 0.900038 | 0.006856 | 0.015497 | 2.703782 | Up | chromosome 5 open reading frame 52                                      |
| ST6GALNAC5  | 0.89952  | 3.01E-08 | 2.89E-07 | 5.540709 | Up | ST6 N-acetylgalactosaminide alpha-2,6-sialyltransferase 5               |
| LAMP5-AS1   | 0.899431 | 3.77E-06 | 2.02E-05 | 4.623449 | Up | LAMP5 antisense RNA 1                                                   |
| NMNAT2      | 0.899216 | 4.78E-11 | 1.18E-09 | 6.577507 | Up | nicotinamide nucleotide adenylyltransferase 2                           |
| INHBA-AS1   | 0.896832 | 4.66E-13 | 2.32E-11 | 7.234822 | Up | INHBA antisense RNA 1                                                   |
| SMIM21      | 0.896187 | 0.014305 | 0.029552 | 2.449511 | Up | small integral membrane protein 21                                      |
| PTER        | 0.895363 | 3.06E-09 | 4.12E-08 | 5.928114 | Up | phosphotriesterase related                                              |
| ENC1        | 0.893532 | 2.11E-08 | 2.14E-07 | 5.602776 | Up | ectodermal-neural cortex 1                                              |
| CCDC184     | 0.893363 | 2.03E-13 | 1.15E-11 | 7.346483 | Up | coiled-coil domain containing 184                                       |
| NELL1       | 0.891575 | 1.90E-08 | 1.96E-07 | 5.620431 | Up | neural EGFL like 1                                                      |
| CALCB       | 0.889626 | 3.96E-05 | 0.000163 | 4.109638 | Up | calcitonin related polypeptide beta                                     |
| GPR158      | 0.888867 | 5.95E-10 | 1.01E-08 | 6.191769 | Up | G protein-coupled receptor 158                                          |
| GFRA4       | 0.888466 | 4.31E-08 | 3.94E-07 | 5.47784  | Up | GDNF family receptor alpha 4                                            |
| GRIN2B      | 0.885576 | 5.06E-08 | 4.53E-07 | 5.449014 | Up | glutamate ionotropic receptor NMDA type subunit 2B                      |
| LAMP5       | 0.884614 | 2.89E-08 | 2.80E-07 | 5.547776 | Up | lysosomal associated membrane protein family member 5                   |
| HCN1        | 0.884586 | 5.27E-08 | 4.69E-07 | 5.441852 | Up | hyperpolarization activated cyclic nucleotide gated potassium channel 1 |
| FBXL21P     | 0.883837 | 2.05E-05 | 9.11E-05 | 4.259079 | Up | F-box and leucine rich repeat protein 21, pseudogene                    |
| ANKRD20A19P | 0.882067 | 0.000222 | 0.000749 | 3.692125 | Up | ankyrin repeat domain 20 family member A19, pseudogene                  |
| RHOV        | 0.881065 | 6.56E-10 | 1.10E-08 | 6.176433 | Up | ras homolog family member V                                             |
| JARID2-AS1  | 0.878863 | 3.34E-07 | 2.37E-06 | 5.10326  | Up | JARID2 antisense RNA 1                                                  |
| KCNB2       | 0.87725  | 5.28E-08 | 4.69E-07 | 5.441764 | Up | potassium voltage-gated channel subfamily B member 2                    |
| ENTPD3      | 0.876706 | 1.75E-10 | 3.60E-09 | 6.38155  | Up | ectonucleoside triphosphate diphosphohydrolase 3                        |
| OTOL1       | 0.874487 | 0.000267 | 0.000879 | 3.645784 | Up | otolin 1                                                                |
| DLGAP1      | 0.874408 | 2.22E-10 | 4.40E-09 | 6.344991 | Up | DLG associated protein 1                                                |
| PCP4L1      | 0.874291 | 8.62E-10 | 1.38E-08 | 6.133126 | Up | Purkinje cell protein 4 like 1                                          |
| FATE1       | 0.872197 | 9.00E-06 | 4.39E-05 | 4.440013 | Up | fetal and adult testis expressed 1                                      |
| GABRA4      | 0.871964 | 2.32E-07 | 1.71E-06 | 5.171299 | Up | gamma-aminobutyric acid type A receptor subunit alpha4                  |
| AKAP5       | 0.871719 | 2.90E-09 | 3.93E-08 | 5.937232 | Up | A-kinase anchoring protein 5                                            |
| ADRA1D      | 0.870488 | 2.30E-10 | 4.53E-09 | 6.339877 | Up | adrenoceptor alpha 1D                                                   |
| C11orf87    | 0.870409 | 2.83E-08 | 2.75E-07 | 5.551377 | Up | chromosome 11 open reading frame 87                                     |
| CDK6-AS1    | 0.867973 | 3.39E-08 | 3.20E-07 | 5.520107 | Up | CDK6 antisense RNA 1                                                    |
| LGALS16     | 0.867257 | 0.00243  | 0.006243 | 3.031912 | Up | galectin 16                                                             |
| CAP2        | 0.866391 | 1.34E-08 | 1.45E-07 | 5.680436 | Up | cyclase associated actin cytoskeleton regulatory protein 2              |

|             |          |          |          |          |    |                                                      |
|-------------|----------|----------|----------|----------|----|------------------------------------------------------|
| KCNC2       | 0.86587  | 4.06E-09 | 5.23E-08 | 5.881548 | Up | potassium voltage-gated channel subfamily C member 2 |
| MGC12916    | 0.865719 | 4.90E-05 | 0.000196 | 4.060577 | Up | uncharacterized protein MGC12916                     |
| PTPN3       | 0.865436 | 1.20E-10 | 2.60E-09 | 6.438716 | Up | protein tyrosine phosphatase non-receptor type 3     |
| DHRS7C      | 0.865012 | 6.22E-08 | 5.40E-07 | 5.412323 | Up | dehydrogenase/reductase 7C                           |
| SERF1A      | 0.861415 | 0.02312  | 0.044943 | 2.271451 | Up | small EDRK-rich factor 1A                            |
| GCNT4       | 0.859334 | 2.14E-05 | 9.45E-05 | 4.249654 | Up | glucosaminyl (N-acetyl) transferase 4                |
| TDRD5       | 0.859286 | 1.61E-07 | 1.23E-06 | 5.239612 | Up | tudor domain containing 5                            |
| RGS7        | 0.859005 | 2.82E-10 | 5.33E-09 | 6.308637 | Up | regulator of G protein signaling 7                   |
| KCNH5       | 0.858044 | 8.23E-06 | 4.05E-05 | 4.45907  | Up | potassium voltage-gated channel subfamily H member 5 |
| IL12RB2     | 0.856705 | 1.15E-08 | 1.26E-07 | 5.707141 | Up | interleukin 12 receptor subunit beta 2               |
| AVP         | 0.856049 | 0.005559 | 0.012881 | 2.772708 | Up | arginine vasopressin                                 |
| DYDC1       | 0.855875 | 0.000633 | 0.0019   | 3.417029 | Up | DPY30 domain containing 1                            |
| DGKB        | 0.855847 | 5.27E-09 | 6.49E-08 | 5.838395 | Up | diacylglycerol kinase beta                           |
| VSNL1       | 0.855091 | 2.13E-08 | 2.16E-07 | 5.601312 | Up | visinin like 1                                       |
| BNIP5       | 0.854939 | 4.47E-07 | 3.07E-06 | 5.047906 | Up | BCL2 interacting protein 5                           |
| NAPB        | 0.853004 | 9.65E-12 | 3.04E-10 | 6.811636 | Up | NSF attachment protein beta                          |
| FGF9        | 0.853004 | 1.18E-09 | 1.82E-08 | 6.082397 | Up | fibroblast growth factor 9                           |
| FAM238B     | 0.851614 | 2.30E-07 | 1.70E-06 | 5.173432 | Up | family with sequence similarity 238 member B         |
| PAX5        | 0.851044 | 0.000141 | 0.000498 | 3.807051 | Up | paired box 5                                         |
| HTR2A       | 0.850773 | 5.59E-08 | 4.92E-07 | 5.431592 | Up | 5-hydroxytryptamine receptor 2A                      |
| NAP1L2      | 0.850242 | 2.61E-08 | 2.57E-07 | 5.56556  | Up | nucleosome assembly protein 1 like 2                 |
| C6orf141    | 0.846646 | 3.50E-06 | 1.90E-05 | 4.638775 | Up | chromosome 6 open reading frame 141                  |
| CLTRN       | 0.846631 | 1.29E-10 | 2.75E-09 | 6.428812 | Up | collectrin, amino acid transport regulator           |
| DLX1        | 0.845535 | 9.73E-10 | 1.53E-08 | 6.113723 | Up | distal-less homeobox 1                               |
| PAK1        | 0.845205 | 9.72E-12 | 3.06E-10 | 6.810605 | Up | p21 (RAC1) activated kinase 1                        |
| TESPA1      | 0.844983 | 6.79E-08 | 5.83E-07 | 5.396567 | Up | thymocyte expressed, positive selection associated 1 |
| DLX6        | 0.843311 | 6.63E-09 | 7.84E-08 | 5.800028 | Up | distal-less homeobox 6                               |
| CACNA1C-IT2 | 0.842806 | 0.000864 | 0.002503 | 3.331345 | Up | CACNA1C intronic transcript 2                        |
| NPSR1-AS1   | 0.841801 | 0.000674 | 0.002008 | 3.399907 | Up | NPSR1 antisense RNA 1                                |
| PAK3        | 0.840507 | 7.34E-10 | 1.21E-08 | 6.158679 | Up | p21 (RAC1) activated kinase 3                        |
| MCHR2-AS1   | 0.839539 | 0.013371 | 0.027878 | 2.473731 | Up | MCHR2 antisense RNA 1                                |
| NAT16       | 0.838617 | 7.08E-13 | 3.34E-11 | 7.177972 | Up | N-acetyltransferase 16 (putative)                    |
| LY86-AS1    | 0.83772  | 7.70E-09 | 8.92E-08 | 5.774911 | Up | LY86 antisense RNA 1                                 |
| SLC30A3     | 0.83743  | 1.41E-07 | 1.10E-06 | 5.263377 | Up | solute carrier family 30 member 3                    |
| NCALD       | 0.837209 | 1.53E-12 | 6.38E-11 | 7.071777 | Up | neurocalcin delta                                    |
| ANO3        | 0.836643 | 6.68E-08 | 5.74E-07 | 5.399576 | Up | anoctamin 3                                          |
| GLRA2       | 0.836266 | 1.39E-07 | 1.09E-06 | 5.266285 | Up | glycine receptor alpha 2                             |
| SLC39A2     | 0.834221 | 0.000258 | 0.000853 | 3.654516 | Up | solute carrier family 39 member 2                    |
| GUCA1C      | 0.833736 | 0.022726 | 0.044271 | 2.278005 | Up | guanylatecyclase activator 1C                        |
| CFAP61-AS1  | 0.832953 | 0.001046 | 0.00296  | 3.27773  | Up | CFAP61 antisense RNA 1                               |
| STXBP5L     | 0.83278  | 8.25E-09 | 9.48E-08 | 5.763243 | Up | syntaxin binding protein 5 like                      |
| NELL2       | 0.832359 | 1.13E-07 | 9.08E-07 | 5.30379  | Up | neural EGFL like 2                                   |
| BHLHA9      | 0.832224 | 3.49E-05 | 0.000145 | 4.139005 | Up | basic helix-loop-helix family member a9              |

|           |          |          |          |          |    |                                                                     |
|-----------|----------|----------|----------|----------|----|---------------------------------------------------------------------|
| TAFA1     | 0.83193  | 9.41E-10 | 1.49E-08 | 6.119151 | Up | TAFA chemokine like family member 1                                 |
| F7        | 0.831629 | 2.19E-10 | 4.35E-09 | 6.347394 | Up | coagulation factor VII                                              |
| PGM2L1    | 0.831592 | 1.46E-08 | 1.55E-07 | 5.666753 | Up | phosphoglucomutase 2 like 1                                         |
| RBFOX1    | 0.831543 | 1.07E-08 | 1.18E-07 | 5.719858 | Up | RNA binding fox-1 homolog 1                                         |
| CTSE      | 0.831448 | 0.014431 | 0.029756 | 2.446358 | Up | cathepsin E                                                         |
| GADL1     | 0.830936 | 0.013697 | 0.028485 | 2.465104 | Up | glutamate decarboxylase like 1                                      |
| RTKN2     | 0.830778 | 3.81E-08 | 3.55E-07 | 5.49966  | Up | rhotekin 2                                                          |
| ERICH3    | 0.830708 | 3.43E-07 | 2.43E-06 | 5.098109 | Up | glutamate rich 3                                                    |
| ATP12A    | 0.830435 | 0.010676 | 0.022857 | 2.553118 | Up | ATPase H+/K+ transporting non-gastric alpha2 subunit                |
| SCN2A     | 0.830033 | 2.14E-08 | 2.16E-07 | 5.600563 | Up | sodium voltage-gated channel alpha subunit 2                        |
| MCHR2     | 0.829027 | 0.000253 | 0.000838 | 3.659662 | Up | melanin concentrating hormone receptor 2                            |
| NDST3     | 0.828983 | 4.21E-07 | 2.91E-06 | 5.059209 | Up | N-deacetylase and N-sulfotransferase 3                              |
| SPRNP1    | 0.828608 | 1.83E-08 | 1.89E-07 | 5.627459 | Up | shadow of prion protein pseudogene 1                                |
| HCRTR2    | 0.827387 | 1.72E-07 | 1.31E-06 | 5.227545 | Up | hypocretin receptor 2                                               |
| ADRB3     | 0.826858 | 1.72E-07 | 1.31E-06 | 5.226834 | Up | adrenoceptor beta 3                                                 |
| FSTL5     | 0.826785 | 5.98E-08 | 5.22E-07 | 5.419258 | Up | follistatin like 5                                                  |
| GPR88     | 0.824455 | 2.05E-11 | 5.74E-10 | 6.702157 | Up | G protein-coupled receptor 88                                       |
| NPBWR1    | 0.824374 | 0.0064   | 0.014591 | 2.726559 | Up | neuropeptides B and W receptor 1                                    |
| THCAT155  | 0.824154 | 6.82E-09 | 8.02E-08 | 5.795246 | Up | thyroid cancer-associated transcript 155                            |
| SV2B      | 0.823749 | 2.17E-09 | 3.05E-08 | 5.984701 | Up | synaptic vesicle glycoprotein 2B                                    |
| SYT13     | 0.823406 | 2.61E-09 | 3.58E-08 | 5.954176 | Up | synaptotagmin 13                                                    |
| GTF2IP7   | 0.823009 | 0.001843 | 0.004883 | 3.114385 | Up | general transcription factor Iiipseudogene 7                        |
| CDH12     | 0.822897 | 1.05E-06 | 6.52E-06 | 4.882926 | Up | cadherin 12                                                         |
| NR1H4     | 0.821498 | 3.89E-05 | 0.00016  | 4.114001 | Up | nuclear receptor subfamily 1 group H member 4                       |
| SYP       | 0.821434 | 3.78E-10 | 6.85E-09 | 6.262746 | Up | synaptophysin                                                       |
| RSPO2     | 0.820785 | 5.58E-09 | 6.81E-08 | 5.828761 | Up | R-spondin 2                                                         |
| PLCXD3    | 0.820371 | 5.10E-10 | 8.86E-09 | 6.216123 | Up | phosphatidylinositol specific phospholipase C X domain containing 3 |
| SYT2      | 0.81991  | 0.000194 | 0.000662 | 3.727284 | Up | synaptotagmin 2                                                     |
| STMN2     | 0.81946  | 4.54E-09 | 5.73E-08 | 5.863345 | Up | stathmin 2                                                          |
| SPATA31C1 | 0.819192 | 0.016741 | 0.033924 | 2.39235  | Up | SPATA31 subfamily C member 1                                        |
| RUNX1-IT1 | 0.816682 | 0.018606 | 0.037218 | 2.353329 | Up | RUNX1 intronic transcript 1                                         |
| CALY      | 0.816668 | 7.90E-10 | 1.29E-08 | 6.146997 | Up | calcyon neuron specific vesicular protein                           |
| SLC12A1   | 0.815891 | 4.75E-06 | 2.47E-05 | 4.575638 | Up | solute carrier family 12 member 1                                   |
| FGF5      | 0.815253 | 5.48E-05 | 0.000217 | 4.034345 | Up | fibroblast growth factor 5                                          |
| PRPH2     | 0.814442 | 6.03E-11 | 1.44E-09 | 6.542904 | Up | peripherin 2                                                        |
| PRSS16    | 0.813423 | 2.27E-09 | 3.18E-08 | 5.976994 | Up | serine protease 16                                                  |
| NSF       | 0.813317 | 4.16E-10 | 7.41E-09 | 6.248053 | Up | N-ethylmaleimide sensitive factor, vesicle fusing ATPase            |
| CYMP      | 0.812548 | 1.86E-05 | 8.35E-05 | 4.28113  | Up | chymosin, pseudogene                                                |
| GPR149    | 0.812373 | 0.001089 | 0.003064 | 3.266419 | Up | G protein-coupled receptor 149                                      |
| CHRNB3    | 0.811471 | 7.07E-07 | 4.61E-06 | 4.959386 | Up | cholinergic receptor nicotinic beta 3 subunit                       |
| OR1F1     | 0.810384 | 0.000191 | 0.000654 | 3.731098 | Up | olfactory receptor family 1 subfamily F member 1                    |
| LRTM2     | 0.809731 | 1.17E-09 | 1.80E-08 | 6.084398 | Up | leucine rich repeats and transmembrane domains 2                    |

|            |          |          |          |          |    |                                                             |
|------------|----------|----------|----------|----------|----|-------------------------------------------------------------|
| RXFP1      | 0.809409 | 2.13E-06 | 1.22E-05 | 4.740566 | Up | relaxin family peptide receptor 1                           |
| STYXL2     | 0.809064 | 1.89E-12 | 7.55E-11 | 7.042214 | Up | serine/threonine/tyrosine interacting like 2                |
| SYT10      | 0.808703 | 2.85E-05 | 0.000122 | 4.185372 | Up | synaptotagmin 10                                            |
| TAFA2      | 0.808593 | 8.31E-08 | 6.96E-07 | 5.360359 | Up | TAFA chemokine like family member 2                         |
| GPR158-AS1 | 0.807864 | 8.35E-11 | 1.91E-09 | 6.494201 | Up | GPR158 antisense RNA 1                                      |
| NEURL1-AS1 | 0.807801 | 0.002609 | 0.006654 | 3.010454 | Up | NEURL1 antisense RNA 1                                      |
| PRKCE      | 0.807405 | 1.81E-10 | 3.70E-09 | 6.376777 | Up | protein kinase C epsilon                                    |
| PNMA2      | 0.806543 | 1.73E-10 | 3.56E-09 | 6.383802 | Up | PNMA family member 2                                        |
| LEXM       | 0.805554 | 0.000379 | 0.001207 | 3.554094 | Up | lymphocyte expansion molecule                               |
| RASL11B    | 0.804277 | 1.33E-09 | 2.00E-08 | 6.063177 | Up | RAS like family 11 member B                                 |
| DCLK1      | 0.803629 | 1.59E-09 | 2.33E-08 | 6.035155 | Up | doublecortin like kinase 1                                  |
| PAX7       | 0.802991 | 5.33E-08 | 4.73E-07 | 5.439964 | Up | paired box 7                                                |
| GRIN2A     | 0.802863 | 1.94E-08 | 1.99E-07 | 5.617483 | Up | glutamate ionotropic receptor NMDA type subunit 2A          |
| VSIG1      | 0.802859 | 1.23E-08 | 1.33E-07 | 5.69593  | Up | V-set and immunoglobulin domain containing 1                |
| AKAIN1     | 0.801937 | 0.000446 | 0.001395 | 3.51131  | Up | A-kinase anchor inhibitor 1                                 |
| RFPL1      | 0.801552 | 1.58E-06 | 9.41E-06 | 4.800221 | Up | ret finger protein like 1                                   |
| DLX6-AS1   | 0.80028  | 0.000334 | 0.001078 | 3.587014 | Up | DLX6 antisense RNA 1                                        |
| KCNQ5      | 0.799723 | 4.12E-06 | 2.19E-05 | 4.605187 | Up | potassium voltage-gated channel subfamily Q member 5        |
| RHEX       | 0.799218 | 0.006464 | 0.01472  | 2.723255 | Up | regulator of hemoglobinization and erythroid cell expansion |
| COL25A1    | 0.798211 | 1.03E-05 | 4.95E-05 | 4.411255 | Up | collagen type XXV alpha 1 chain                             |
| CAMK4      | 0.798093 | 1.56E-07 | 1.20E-06 | 5.245789 | Up | calcium/calmodulin dependent protein kinase IV              |
| ATP2B1-AS1 | 0.798012 | 8.90E-13 | 4.04E-11 | 7.146452 | Up | ATP2B1 antisense RNA 1                                      |
| TUBB2A     | 0.796202 | 2.76E-12 | 1.04E-10 | 6.989311 | Up | tubulin beta 2A class IIa                                   |
| CDH8       | 0.796137 | 2.88E-10 | 5.44E-09 | 6.305043 | Up | cadherin 8                                                  |
| VWC2L      | 0.795176 | 0.000152 | 0.000533 | 3.788101 | Up | von Willebrand factor C domain containing 2 like            |
| HUNK       | 0.791394 | 4.46E-11 | 1.11E-09 | 6.587934 | Up | hormonally up-regulated Neu-associated kinase               |
| MDH1       | 0.789285 | 2.31E-12 | 8.96E-11 | 7.014419 | Up | malate dehydrogenase 1                                      |
| HMGCLL1    | 0.788594 | 1.08E-11 | 3.33E-10 | 6.795805 | Up | 3-hydroxymethyl-3-methylglutaryl-CoA lyase like 1           |
| HTR1A      | 0.788329 | 0.000357 | 0.001143 | 3.570135 | Up | 5-hydroxytryptamine receptor 1A                             |
| NWD2       | 0.788081 | 4.84E-06 | 2.52E-05 | 4.571641 | Up | NACHT and WD repeat domain containing 2                     |
| SP9        | 0.788008 | 6.33E-05 | 0.000246 | 4.000026 | Up | Sp9 transcription factor                                    |
| RASSF6     | 0.787955 | 0.010396 | 0.02233  | 2.562355 | Up | Ras association domain family member 6                      |
| C8orf86    | 0.787699 | 3.09E-05 | 0.000131 | 4.166672 | Up | chromosome 8 open reading frame 86                          |
| SNX10      | 0.787314 | 2.14E-08 | 2.16E-07 | 5.600672 | Up | sorting nexin 10                                            |
| MAP7D2     | 0.787212 | 1.82E-09 | 2.62E-08 | 6.013113 | Up | MAP7 domain containing 2                                    |
| SYN2       | 0.786693 | 2.37E-08 | 2.36E-07 | 5.582792 | Up | synapsin II                                                 |
| UPK2       | 0.786654 | 6.21E-07 | 4.11E-06 | 4.984426 | Up | uroplakin 2                                                 |
| LRR38      | 0.786119 | 5.89E-06 | 3.00E-05 | 4.530286 | Up | leucine rich repeat containing 38                           |
| PP12613    | 0.786114 | 3.42E-05 | 0.000143 | 4.143663 | Up | uncharacterized LOC100192379                                |
| TRIM72     | 0.784408 | 2.17E-06 | 1.24E-05 | 4.737377 | Up | tripartite motif containing 72                              |
| FBXO16     | 0.783954 | 2.66E-13 | 1.44E-11 | 7.310474 | Up | F-box protein 16                                            |
| TMEM200A   | 0.782944 | 6.78E-10 | 1.13E-08 | 6.171094 | Up | transmembrane protein 200A                                  |
| RIIAD1     | 0.782351 | 3.26E-11 | 8.49E-10 | 6.634452 | Up | regulatory subunit of type II PKA R-subunit domain          |



containing 1

|            |          |          |          |          |    |                                                                                                                        |
|------------|----------|----------|----------|----------|----|------------------------------------------------------------------------------------------------------------------------|
| GGNBP1     | 0.782076 | 4.25E-07 | 2.93E-06 | 5.057327 | Up | gametogenetin binding protein 1 (pseudogene)                                                                           |
| BEX1       | 0.781213 | 3.06E-12 | 1.14E-10 | 6.975154 | Up | brain expressed X-linked 1                                                                                             |
| ELAVL2     | 0.780828 | 4.14E-07 | 2.87E-06 | 5.062446 | Up | ELAV like RNA binding protein 2                                                                                        |
| ZNF98      | 0.780164 | 6.94E-05 | 0.000267 | 3.978392 | Up | zinc finger protein 98                                                                                                 |
| ELMOD1     | 0.779622 | 1.76E-08 | 1.83E-07 | 5.634133 | Up | ELMO domain containing 1                                                                                               |
| IPCEF1     | 0.779195 | 2.68E-10 | 5.13E-09 | 6.316097 | Up | interaction protein for cytohesin exchange factors 1                                                                   |
| SIDT1      | 0.778754 | 1.19E-11 | 3.64E-10 | 6.781485 | Up | SID1 transmembrane family member 1                                                                                     |
| CLEC2L     | 0.777808 | 3.00E-09 | 4.04E-08 | 5.931794 | Up | C-type lectin domain family 2 member L                                                                                 |
| XK         | 0.777647 | 1.12E-08 | 1.24E-07 | 5.711239 | Up | X-linked Kx blood group                                                                                                |
| WNT1       | 0.776704 | 1.24E-05 | 5.86E-05 | 4.370504 | Up | Wnt family member 1                                                                                                    |
| KRT222     | 0.776693 | 5.88E-08 | 5.15E-07 | 5.422283 | Up | keratin 222                                                                                                            |
| SULT4A1    | 0.776176 | 3.50E-09 | 4.62E-08 | 5.906184 | Up | sulfotransferase family 4A member 1                                                                                    |
| NEFH       | 0.775778 | 6.14E-05 | 0.000239 | 4.007474 | Up | neurofilament heavy                                                                                                    |
| GABRD      | 0.775735 | 3.17E-08 | 3.02E-07 | 5.531769 | Up | gamma-aminobutyric acid type A receptor subunit delta transient receptor potential cation channel subfamily C member 7 |
| TRPC7      | 0.775079 | 5.86E-05 | 0.00023  | 4.018197 | Up |                                                                                                                        |
| NRG1       | 0.774868 | 2.54E-07 | 1.86E-06 | 5.155013 | Up | neuregulin 1                                                                                                           |
| HS6ST3     | 0.774066 | 6.68E-09 | 7.88E-08 | 5.798765 | Up | heparansulfate 6-O-sulfotransferase 3                                                                                  |
| RFPL1S     | 0.773705 | 1.41E-08 | 1.51E-07 | 5.671767 | Up | RFPL1 antisense RNA 1                                                                                                  |
| PTH2R      | 0.772967 | 6.01E-09 | 7.22E-08 | 5.816365 | Up | parathyroid hormone 2 receptor                                                                                         |
| FAM81A     | 0.772769 | 6.58E-13 | 3.13E-11 | 7.187816 | Up | family with sequence similarity 81 member A                                                                            |
| HAO2-IT1   | 0.772461 | 0.011554 | 0.02452  | 2.525467 | Up | HAO2 intronic transcript 1                                                                                             |
| NETO1      | 0.771691 | 2.54E-09 | 3.49E-08 | 5.959053 | Up | neuropilin and tolloid like 1                                                                                          |
| INSYN1-AS1 | 0.770357 | 2.25E-06 | 1.28E-05 | 4.729212 | Up | INSYN1 antisense RNA 1                                                                                                 |
| FGF12      | 0.769374 | 6.08E-10 | 1.03E-08 | 6.188314 | Up | fibroblast growth factor 12                                                                                            |
| PLPPR4     | 0.769269 | 1.24E-06 | 7.58E-06 | 4.849748 | Up | phospholipid phosphatase related 4                                                                                     |
| LPA        | 0.769136 | 1.02E-08 | 1.14E-07 | 5.727883 | Up | lipoprotein(a)                                                                                                         |
| MACROD2    | 0.768905 | 2.52E-10 | 4.89E-09 | 6.325602 | Up | mono-ADP ribosylhydrolase 2                                                                                            |
| SERPINB13  | 0.768716 | 0.006995 | 0.015776 | 2.69707  | Up | serpin family B member 13                                                                                              |
| ZNF860     | 0.768457 | 8.12E-07 | 5.21E-06 | 4.932554 | Up | zinc finger protein 860                                                                                                |
| PLCB1      | 0.767706 | 7.65E-08 | 6.48E-07 | 5.37509  | Up | phospholipase C beta 1                                                                                                 |
| SH3GL2     | 0.767358 | 1.37E-07 | 1.07E-06 | 5.269271 | Up | SH3 domain containing GRB2 like 2, endophilin A1                                                                       |
| MLLT11     | 0.767026 | 2.96E-10 | 5.57E-09 | 6.301095 | Up | MLLT11 transcription factor 7 cofactor                                                                                 |
| KISS1      | 0.766693 | 0.000121 | 0.000437 | 3.843699 | Up | KiSS-1 metastasis suppressor                                                                                           |
| FABP12     | 0.766559 | 0.009475 | 0.020563 | 2.59441  | Up | fatty acid binding protein 12                                                                                          |
| PDP1       | 0.76636  | 2.99E-08 | 2.88E-07 | 5.541828 | Up | pyruvate dehydrogenase phosphatase catalytic subunit 1                                                                 |
| FUT3       | 0.766263 | 1.96E-05 | 8.73E-05 | 4.269365 | Up | fucosyltransferase 3 (Lewis blood group)                                                                               |
| REC114     | 0.765964 | 7.06E-08 | 6.02E-07 | 5.389706 | Up | REC114 meiotic recombination protein                                                                                   |
| RFX8       | 0.765632 | 2.30E-07 | 1.70E-06 | 5.173009 | Up | regulatory factor X8                                                                                                   |
| SFTPA2     | 0.764227 | 2.53E-07 | 1.85E-06 | 5.155471 | Up | surfactant protein A2                                                                                                  |
| SMIM17     | 0.764165 | 3.86E-08 | 3.59E-07 | 5.497218 | Up | small integral membrane protein 17                                                                                     |
| PCYOX1L    | 0.76389  | 8.74E-14 | 5.63E-12 | 7.458705 | Up | prenylcysteine oxidase 1 like                                                                                          |

|            |          |          |          |          |    |                                                         |
|------------|----------|----------|----------|----------|----|---------------------------------------------------------|
| TPBGL      | 0.76382  | 4.44E-09 | 5.64E-08 | 5.866783 | Up | trophoblast glycoprotein like                           |
| TMEM210    | 0.7629   | 0.01941  | 0.038603 | 2.337553 | Up | transmembrane protein 210                               |
| C2orf80    | 0.762762 | 4.75E-10 | 8.34E-09 | 6.227054 | Up | chromosome 2 open reading frame 80                      |
| REEP1      | 0.762117 | 8.58E-12 | 2.76E-10 | 6.828519 | Up | receptor accessory protein 1                            |
| UPK3A      | 0.760624 | 0.000286 | 0.000938 | 3.627529 | Up | uroplakin 3A                                            |
| CADPS      | 0.760332 | 2.95E-08 | 2.84E-07 | 5.544592 | Up | calcium dependent secretion activator                   |
| MAJIN      | 0.760196 | 0.025221 | 0.048387 | 2.238008 | Up | membrane anchored junction protein                      |
| OBSCN-AS1  | 0.759842 | 8.90E-11 | 2.01E-09 | 6.484617 | Up | OBSCN antisense RNA 1                                   |
| CHRNA6     | 0.758185 | 7.65E-05 | 0.000291 | 3.955065 | Up | cholinergic receptor nicotinic alpha 6 subunit          |
| OR13C5     | 0.757862 | 0.008411 | 0.018495 | 2.635112 | Up | olfactory receptor family 13 subfamily C member 5       |
| NRXN3      | 0.757322 | 2.45E-10 | 4.78E-09 | 6.329818 | Up | neurexin 3                                              |
| GSG1       | 0.757196 | 7.62E-10 | 1.25E-08 | 6.152657 | Up | germ cell associated 1                                  |
| INA        | 0.757189 | 3.87E-08 | 3.60E-07 | 5.496729 | Up | internexin neuronal intermediate filament protein alpha |
| FBXW7-AS1  | 0.75659  | 2.31E-05 | 0.000101 | 4.232857 | Up | FBXW7 antisense RNA 1                                   |
| F2RL2      | 0.756403 | 9.35E-05 | 0.000347 | 3.906945 | Up | coagulation factor II thrombin receptor like 2          |
| VSX2       | 0.756098 | 1.11E-05 | 5.33E-05 | 4.393727 | Up | visual system homeobox 2                                |
| SPINK9     | 0.75466  | 0.001462 | 0.003975 | 3.182099 | Up | serine peptidase inhibitor Kazal type 9                 |
| SFTA3      | 0.753411 | 3.05E-05 | 0.00013  | 4.169403 | Up | surfactant associated 3                                 |
| FRMPD4     | 0.753395 | 4.22E-08 | 3.87E-07 | 5.481463 | Up | FERM and PDZ domain containing 4                        |
| GPRASP2    | 0.753366 | 6.99E-12 | 2.33E-10 | 6.857949 | Up | G protein-coupled receptor associated sorting protein 2 |
| INSM2      | 0.753359 | 1.29E-07 | 1.01E-06 | 5.280938 | Up | INSM transcriptional repressor 2                        |
| SERPINB2   | 0.752998 | 0.007622 | 0.016997 | 2.668386 | Up | serpin family B member 2                                |
| CLSTN3     | 0.752866 | 7.63E-10 | 1.25E-08 | 6.152414 | Up | calsyntenin 3                                           |
| VSTM5      | 0.752664 | 0.000824 | 0.0024   | 3.344744 | Up | V-set and transmembrane domain containing 5             |
| P2RX2      | 0.75251  | 0.003585 | 0.008785 | 2.91252  | Up | purinergic receptor P2X 2                               |
| SPRY3      | 0.751835 | 0.005222 | 0.012181 | 2.79298  | Up | sprouty RTK signaling antagonist 3                      |
| GABRG3     | 0.751614 | 4.76E-05 | 0.000191 | 4.067112 | Up | gamma-aminobutyric acid type A receptor subunit gamma3  |
| LRRC3C     | 0.750568 | 0.008068 | 0.017857 | 2.649222 | Up | leucine rich repeat containing 3C                       |
| MROH2A     | 0.750565 | 0.002065 | 0.005406 | 3.080709 | Up | maestro heat like repeat family member 2A               |
| CNGB1      | 0.750255 | 0.000123 | 0.000441 | 3.84077  | Up | cyclic nucleotide gated channel subunit beta 1          |
| FER1L6-AS2 | 0.749074 | 6.69E-07 | 4.39E-06 | 4.970062 | Up | FER1L6 antisense RNA 2                                  |
| MYH13      | 0.748804 | 2.76E-05 | 0.000119 | 4.192209 | Up | myosin heavy chain 13                                   |
| DYNC1H1    | 0.748414 | 5.49E-09 | 6.72E-08 | 5.831583 | Up | dynein cytoplasmic 1 intermediate chain 1               |
| SDR16C5    | 0.7482   | 1.59E-07 | 1.22E-06 | 5.241266 | Up | short chain dehydrogenase/reductase family 16C member 5 |
| CACNB4     | 0.7481   | 1.57E-08 | 1.66E-07 | 5.653746 | Up | calcium voltage-gated channel auxiliary subunit beta 4  |
| ATP8A2     | 0.747635 | 1.57E-09 | 2.31E-08 | 6.036654 | Up | ATPase phospholipid transporting 8A2                    |
| RAB3A      | 0.746687 | 8.27E-09 | 9.50E-08 | 5.762897 | Up | RAB3A, member RAS oncogene family                       |
| DIRAS2     | 0.745925 | 5.14E-07 | 3.48E-06 | 5.020932 | Up | DIRAS family GTPase 2                                   |
| IL1RL2     | 0.745482 | 3.83E-11 | 9.78E-10 | 6.610511 | Up | interleukin 1 receptor like 2                           |
| ADTRP      | 0.745434 | 2.98E-10 | 5.60E-09 | 6.299984 | Up | androgen dependent TFPI regulating protein              |
| LDB2       | 0.745409 | 1.08E-08 | 1.19E-07 | 5.718067 | Up | LIM domain binding 2                                    |
| NUDT11     | 0.745215 | 7.96E-09 | 9.18E-08 | 5.769318 | Up | nudix hydrolase 11                                      |
| EID2B      | 0.745058 | 9.15E-22 | 1.60E-18 | 9.586027 | Up | EP300 interacting inhibitor of differentiation 2B       |

|             |          |          |          |          |    |                                                                      |
|-------------|----------|----------|----------|----------|----|----------------------------------------------------------------------|
| SLC8A1-AS1  | 0.745008 | 0.009636 | 0.020876 | 2.58864  | Up | SLC8A1 antisense RNA 1                                               |
| PIWIL1      | 0.744685 | 0.004425 | 0.010547 | 2.846144 | Up | piwi like RNA-mediated gene silencing 1                              |
| SLC7A4      | 0.743897 | 5.24E-07 | 3.53E-06 | 5.017316 | Up | solute carrier family 7 member 4                                     |
| ANKRD7      | 0.743718 | 4.30E-05 | 0.000174 | 4.090998 | Up | ankyrin repeat domain 7                                              |
| DSG1        | 0.743674 | 0.000363 | 0.001163 | 3.565281 | Up | desmoglein 1                                                         |
| LMO7DN      | 0.743592 | 0.000191 | 0.000654 | 3.731036 | Up | LMO7 downstream neighbor                                             |
| GOLT1A      | 0.743087 | 2.01E-08 | 2.05E-07 | 5.610888 | Up | golgi transport 1A                                                   |
| DNAJC5G     | 0.742717 | 4.41E-06 | 2.32E-05 | 4.591057 | Up | DnaJ heat shock protein family (Hsp40) member C5 gamma               |
| GALNTL6     | 0.742618 | 4.27E-07 | 2.94E-06 | 5.05662  | Up | polypeptide N-acetylgalactosaminyltransferase like 6                 |
| CHML        | 0.74223  | 1.02E-08 | 1.14E-07 | 5.727261 | Up | CHM like Rab escort protein                                          |
| RHO         | 0.740772 | 3.28E-06 | 1.79E-05 | 4.652425 | Up | rhodopsin                                                            |
| COPG2IT1    | 0.740493 | 1.99E-10 | 4.00E-09 | 6.362003 | Up | COPG2 imprinted transcript 1                                         |
| RTN1        | 0.740474 | 2.02E-09 | 2.88E-08 | 5.996057 | Up | reticulon 1                                                          |
| MYB         | 0.740224 | 1.04E-05 | 5.01E-05 | 4.408437 | Up | MYB proto-oncogene, transcription factor                             |
| CLPSL2      | 0.739861 | 3.45E-05 | 0.000144 | 4.141854 | Up | colipase like 2                                                      |
| PPM1E       | 0.739682 | 5.59E-07 | 3.74E-06 | 5.004725 | Up | protein phosphatase, Mg <sup>2+</sup> /Mn <sup>2+</sup> dependent 1E |
| CCDC185     | 0.739573 | 0.007177 | 0.016129 | 2.688519 | Up | coiled-coil domain containing 185                                    |
| PYY         | 0.739488 | 2.95E-05 | 0.000125 | 4.177522 | Up | peptide YY                                                           |
| CT45A10     | 0.739399 | 0.015067 | 0.030877 | 2.430774 | Up | cancer/testis antigen family 45 member A10                           |
| CT45A9      | 0.738628 | 0.015619 | 0.031914 | 2.41769  | Up | cancer/testis antigen family 45 member A9                            |
| B4GALT6     | 0.738589 | 3.22E-09 | 4.31E-08 | 5.91978  | Up | beta-1,4-galactosyltransferase 6                                     |
| NRIP3       | 0.738451 | 1.51E-10 | 3.17E-09 | 6.404415 | Up | nuclear receptor interacting protein 3                               |
| ANKRD34B    | 0.738425 | 0.00056  | 0.001709 | 3.450278 | Up | ankyrin repeat domain 34B                                            |
| NECTIN3-AS1 | 0.738285 | 1.59E-08 | 1.68E-07 | 5.651105 | Up | NECTIN3 antisense RNA 1                                              |
| CHRM4       | 0.738258 | 0.000231 | 0.000774 | 3.682752 | Up | cholinergic receptor muscarinic 4                                    |
| ACTR3-AS1   | 0.737832 | 3.38E-08 | 3.19E-07 | 5.520441 | Up | ACTR3 antisense RNA 1                                                |
| PLK4        | 0.737252 | 2.13E-09 | 3.01E-08 | 5.987443 | Up | polo like kinase 4                                                   |
| MSC-AS1     | 0.735383 | 4.88E-11 | 1.20E-09 | 6.574595 | Up | MSC antisense RNA 1                                                  |
| FNDC9       | 0.734977 | 1.79E-10 | 3.66E-09 | 6.378465 | Up | fibronectin type III domain containing 9                             |
| SYNGR4      | 0.734788 | 1.32E-06 | 7.99E-06 | 4.837367 | Up | synaptogyrin 4                                                       |
| IGF1        | 0.734717 | 5.54E-08 | 4.89E-07 | 5.433202 | Up | insulin like growth factor 1                                         |
| PLK2        | 0.734232 | 1.84E-10 | 3.75E-09 | 6.37373  | Up | polo like kinase 2                                                   |
| CT55        | 0.734099 | 0.005868 | 0.013503 | 2.755072 | Up | cancer/testis antigen 55                                             |
| TAC3        | 0.733809 | 9.94E-08 | 8.12E-07 | 5.327791 | Up | tachykinin precursor 3                                               |
| FSTL4       | 0.733439 | 6.59E-08 | 5.68E-07 | 5.402006 | Up | follistatin like 4                                                   |
| LRFN5       | 0.733294 | 3.03E-08 | 2.91E-07 | 5.539536 | Up | leucine rich repeat and fibronectin type III domain containing 5     |
| ZNF441      | 0.732996 | 4.57E-12 | 1.61E-10 | 6.918248 | Up | zinc finger protein 441                                              |
| SCN8A       | 0.732736 | 1.62E-09 | 2.37E-08 | 6.03188  | Up | sodium voltage-gated channel alpha subunit 8                         |
| TRHDE       | 0.732698 | 3.06E-05 | 0.00013  | 4.169187 | Up | thyrotropin releasing hormone degrading enzyme                       |
| GAP43       | 0.732487 | 2.10E-09 | 2.98E-08 | 5.989608 | Up | growth associated protein 43                                         |
| ANKRD20A8P  | 0.731571 | 0.00292  | 0.00734  | 2.976044 | Up | ankyrin repeat domain 20 family member A8, pseudogene                |
| ALG1L2      | 0.731189 | 0.00366  | 0.008943 | 2.906099 | Up | ALG1 chitobiosyldiphosphodolichol beta-mannosyltransferase like 2    |

|           |          |          |          |          |      |                                                           |
|-----------|----------|----------|----------|----------|------|-----------------------------------------------------------|
| PAQR9     | 0.731112 | 1.56E-07 | 1.20E-06 | 5.245276 | Up   | progesterone and adipoQ receptor family member 9          |
| MMP8      | -1.87297 | 3.77E-06 | 2.02E-05 | -4.62382 | Down | matrix metalloproteinase 8                                |
| H4C4      | -1.76756 | 2.85E-08 | 2.77E-07 | -5.55021 | Down | H4 clustered histone 4                                    |
| MMP7      | -1.62335 | 0.00384  | 0.009316 | -2.89102 | Down | matrix metalloproteinase 7                                |
| CRNN      | -1.60805 | 0.000339 | 0.001093 | -3.58316 | Down | cornulin                                                  |
| SGO1-AS1  | -1.56037 | 2.27E-16 | 4.07E-14 | -8.20684 | Down | SGO1 antisense RNA 1                                      |
| PPBP      | -1.55467 | 6.60E-10 | 1.11E-08 | -6.17549 | Down | pro-platelet basic protein                                |
| GABRR2    | -1.52173 | 6.85E-15 | 7.00E-13 | -7.78726 | Down | gamma-aminobutyric acid type A receptor subunit rho2      |
| CXCR6     | -1.51769 | 7.75E-10 | 1.27E-08 | -6.15003 | Down | C-X-C motif chemokine receptor 6                          |
| MMP10     | -1.48323 | 2.32E-05 | 0.000101 | -4.23186 | Down | matrix metalloproteinase 10                               |
| NTRK3-AS1 | -1.4728  | 6.79E-11 | 1.59E-09 | -6.52523 | Down | NTRK3 antisense RNA 1                                     |
| NMRAL2P   | -1.46874 | 8.75E-07 | 5.58E-06 | -4.91785 | Down | NmrA like redox sensor 2, pseudogene                      |
| CD40LG    | -1.46694 | 3.41E-05 | 0.000143 | -4.14392 | Down | CD40 ligand                                               |
| TTR       | -1.44982 | 1.69E-07 | 1.29E-06 | -5.23065 | Down | transthyretin                                             |
| C11orf86  | -1.4285  | 1.57E-08 | 1.66E-07 | -5.6538  | Down | chromosome 11 open reading frame 86                       |
| H3C6      | -1.42644 | 1.22E-10 | 2.63E-09 | -6.43685 | Down | H3 clustered histone 6                                    |
| FOXA3     | -1.39254 | 1.41E-08 | 1.51E-07 | -5.67182 | Down | forkhead box A3                                           |
| H1-6      | -1.38752 | 3.88E-08 | 3.61E-07 | -5.49626 | Down | H1.6 linker histone, cluster member                       |
| NCR1      | -1.38367 | 3.00E-05 | 0.000128 | -4.17317 | Down | natural cytotoxicity triggering receptor 1                |
| CXCR1     | -1.37112 | 4.34E-09 | 5.54E-08 | -5.87056 | Down | C-X-C motif chemokine receptor 1                          |
| CXCR2     | -1.35865 | 4.88E-09 | 6.08E-08 | -5.85111 | Down | C-X-C motif chemokine receptor 2                          |
| OR7C1     | -1.35682 | 1.42E-10 | 3.01E-09 | -6.41342 | Down | olfactory receptor family 7 subfamily C member 1          |
| RIPOR3    | -1.34988 | 3.00E-24 | 2.44E-20 | -10.1596 | Down | RIPOR family member 3                                     |
| NPC1L1    | -1.34313 | 2.14E-09 | 3.02E-08 | -5.98674 | Down | NPC1 like intracellular cholesterol transporter 1         |
| SLC22A2   | -1.33872 | 2.66E-05 | 0.000115 | -4.20053 | Down | solute carrier family 22 member 2                         |
| SLAMF1    | -1.29934 | 7.02E-05 | 0.00027  | -3.97572 | Down | signaling lymphocytic activation molecule family member 1 |
| PRR33     | -1.29322 | 7.50E-13 | 3.50E-11 | -7.16998 | Down | proline rich 33                                           |
| IRX5      | -1.28506 | 2.32E-05 | 0.000101 | -4.23169 | Down | iroquoishomeobox 5                                        |
| GZMK      | -1.27079 | 4.93E-08 | 4.42E-07 | -5.45395 | Down | granzyme K                                                |
| HSPA6     | -1.26101 | 2.52E-07 | 1.85E-06 | -5.15606 | Down | heat shock protein family A (Hsp70) member 6              |
| GPR174    | -1.25999 | 0.000597 | 0.001805 | -3.43277 | Down | G protein-coupled receptor 174                            |
| GPR20     | -1.25517 | 4.24E-10 | 7.55E-09 | -6.24483 | Down | G protein-coupled receptor 20                             |
| SRPX2     | -1.24021 | 1.00E-21 | 1.63E-18 | -9.57659 | Down | sushi repeat containing protein X-linked 2                |
| PIGR      | -1.24014 | 2.72E-05 | 0.000117 | -4.19549 | Down | polymeric immunoglobulin receptor                         |
| SERPINA5  | -1.23944 | 4.11E-11 | 1.03E-09 | -6.6002  | Down | serpin family A member 5                                  |
| RAB42     | -1.23573 | 1.34E-10 | 2.86E-09 | -6.42264 | Down | RAB42, member RAS oncogene family                         |
| OR2B11    | -1.21985 | 0.000677 | 0.002015 | -3.39876 | Down | olfactory receptor family 2 subfamily B member 11         |
| VHL       | -1.21725 | 1.37E-05 | 6.41E-05 | -4.34826 | Down | VHL like                                                  |
| CDC42BPG  | -1.20827 | 3.29E-16 | 5.39E-14 | -8.16222 | Down | CDC42 binding protein kinase gamma                        |
| PF4       | -1.20232 | 9.11E-06 | 4.44E-05 | -4.43736 | Down | platelet factor 4                                         |
| FCRL1     | -1.20214 | 0.000217 | 0.000732 | -3.69837 | Down | Fc receptor like 1                                        |
| IL1R2     | -1.20129 | 3.69E-06 | 1.99E-05 | -4.62798 | Down | interleukin 1 receptor type 2                             |
| P2RY10    | -1.19993 | 0.000181 | 0.000624 | -3.74418 | Down | P2Y receptor family member 10                             |

|           |          |          |          |          |      |                                                                             |
|-----------|----------|----------|----------|----------|------|-----------------------------------------------------------------------------|
| CXCR4     | -1.19848 | 3.47E-16 | 5.61E-14 | -8.15568 | Down | C-X-C motif chemokine receptor 4                                            |
| GFI1B     | -1.19277 | 6.41E-08 | 5.54E-07 | -5.40696 | Down | growth factor independent 1B transcriptional repressor                      |
| LBX2      | -1.19273 | 2.61E-15 | 3.19E-13 | -7.9082  | Down | ladybird homeobox 2                                                         |
| OGFRP1    | -1.19216 | 1.83E-05 | 8.24E-05 | -4.28468 | Down | opioid growth factor receptor pseudogene 1                                  |
| MFAP2     | -1.18848 | 5.58E-08 | 4.92E-07 | -5.43177 | Down | microfibril associated protein 2                                            |
| C9orf152  | -1.18027 | 3.53E-07 | 2.49E-06 | -5.09287 | Down | chromosome 9 open reading frame 152                                         |
| HMGA2-AS1 | -1.17619 | 5.66E-09 | 6.88E-08 | -5.82655 | Down | HMGA2 antisense RNA 1                                                       |
| BNC1      | -1.17603 | 1.69E-06 | 9.96E-06 | -4.78696 | Down | basonuclin 1                                                                |
| ETV4      | -1.17116 | 1.12E-15 | 1.56E-13 | -8.01319 | Down | ETS variant transcription factor 4                                          |
| SLC35G6   | -1.16741 | 0.000452 | 0.001414 | -3.5076  | Down | solute carrier family 35 member G6                                          |
| ASCL3     | -1.15897 | 0.000491 | 0.00152  | -3.48569 | Down | achaete-scute family bHLH transcription factor 3                            |
| H2AC11    | -1.15382 | 2.30E-06 | 1.30E-05 | -4.72535 | Down | H2A clustered histone 11                                                    |
| S100A4    | -1.15246 | 6.15E-17 | 1.39E-14 | -8.36228 | Down | S100 calcium binding protein A4                                             |
| MGC34796  | -1.15202 | 0.004248 | 0.010177 | -2.85911 | Down | sepiapterinreductase (7,8-dihydrobiopterin:NADP+ oxidoreductase) pseudogene |
| IGF2-AS   | -1.15093 | 2.75E-12 | 1.03E-10 | -6.99008 | Down | IGF2 antisense RNA                                                          |
| SGO1      | -1.14519 | 8.98E-12 | 2.87E-10 | -6.82197 | Down | shugoshin 1                                                                 |
| NKX6-1    | -1.13969 | 7.81E-13 | 3.60E-11 | -7.1645  | Down | NK6 homeobox 1                                                              |
| MS4A1     | -1.12463 | 0.000135 | 0.000481 | -3.81645 | Down | membrane spanning 4-domains A1                                              |
| CASP12    | -1.12382 | 1.39E-10 | 2.96E-09 | -6.41649 | Down | caspase 12 (gene/pseudogene)                                                |
| VNN3      | -1.12378 | 3.92E-06 | 2.09E-05 | -4.6157  | Down | vanin 3                                                                     |
| OBP2B     | -1.11759 | 0.001125 | 0.003153 | -3.25733 | Down | odorant binding protein 2B                                                  |
| MCEMP1    | -1.11703 | 1.08E-06 | 6.70E-06 | -4.87659 | Down | mast cell expressed membrane protein 1                                      |
| CCR2      | -1.11595 | 1.14E-07 | 9.09E-07 | -5.30366 | Down | C-C motif chemokine receptor 2                                              |
| OR7A5     | -1.11498 | 5.76E-07 | 3.84E-06 | -4.99921 | Down | olfactory receptor family 7 subfamily A member 5                            |
| OTX2      | -1.11472 | 0.006137 | 0.014054 | -2.74036 | Down | orthodenticle/homeobox 2                                                    |
| NLRP4     | -1.11124 | 4.24E-05 | 0.000172 | -4.09387 | Down | NLR family pyrin domain containing 4                                        |
| FAM167B   | -1.10988 | 4.63E-12 | 1.63E-10 | -6.91644 | Down | family with sequence similarity 167 member B                                |
| TREML4    | -1.10858 | 0.00863  | 0.018926 | -2.62636 | Down | triggering receptor expressed on myeloid cells like 4                       |
| KCNJ15    | -1.10673 | 1.41E-07 | 1.10E-06 | -5.26341 | Down | potassium inwardly rectifying channel subfamily J member 15                 |
| TBX10     | -1.1034  | 5.87E-07 | 3.91E-06 | -4.99532 | Down | T-box transcription factor 10                                               |
| CSAG4     | -1.10161 | 0.000364 | 0.001163 | -3.56517 | Down | CSAG family member 4 (pseudogene)                                           |
| SIT1      | -1.10067 | 1.36E-05 | 6.36E-05 | -4.35041 | Down | signaling threshold regulating transmembrane adaptor 1                      |
| KCNE4     | -1.09597 | 2.57E-14 | 2.04E-12 | -7.61825 | Down | potassium voltage-gated channel subfamily E regulatory subunit 4            |
| IL7R      | -1.09393 | 4.43E-09 | 5.64E-08 | -5.86717 | Down | interleukin 7 receptor                                                      |
| MIA       | -1.08897 | 1.06E-08 | 1.18E-07 | -5.72106 | Down | MIA SH3 domain containing                                                   |
| CR1L      | -1.08683 | 4.83E-05 | 0.000193 | -4.06387 | Down | complement C3b/C4b receptor 1 like                                          |
| MRGPRF    | -1.08673 | 2.31E-21 | 2.97E-18 | -9.48981 | Down | MAS related GPR family member F                                             |
| HERC2P3   | -1.08534 | 5.78E-09 | 6.99E-08 | -5.82311 | Down | hect domain and RLD 2 pseudogene 3                                          |
| KCNE1     | -1.07928 | 3.48E-05 | 0.000145 | -4.13936 | Down | potassium voltage-gated channel subfamily E regulatory subunit 1            |
| MYOCD     | -1.07852 | 4.63E-15 | 5.07E-13 | -7.8365  | Down | myocardin                                                                   |
| NANOS2    | -1.07812 | 1.01E-07 | 8.27E-07 | -5.32428 | Down | nanos C2HC-type zinc finger 2                                               |
| S100A12   | -1.07697 | 4.64E-05 | 0.000186 | -4.0732  | Down | S100 calcium binding protein A12                                            |

|              |          |          |          |          |      |                                                      |
|--------------|----------|----------|----------|----------|------|------------------------------------------------------|
| CCL26        | -1.07567 | 0.000178 | 0.000614 | -3.74856 | Down | C-C motif chemokine ligand 26                        |
| CLDN18       | -1.07505 | 7.55E-12 | 2.47E-10 | -6.84684 | Down | claudin 18                                           |
| HP           | -1.07397 | 4.95E-07 | 3.36E-06 | -5.02833 | Down | haptoglobin                                          |
| ARHGAP11B    | -1.07397 | 2.60E-07 | 1.90E-06 | -5.15061 | Down | Rho GTPase activating protein 11B                    |
| MIOX         | -1.07318 | 0.001638 | 0.004392 | -3.1491  | Down | myo-inositol oxygenase                               |
| ORM1         | -1.0723  | 0.005072 | 0.011876 | -2.80245 | Down | orosomucoid 1                                        |
| ITGA10       | -1.07112 | 4.12E-21 | 4.57E-18 | -9.42952 | Down | integrin subunit alpha 10                            |
| SLC16A12     | -1.06927 | 1.10E-07 | 8.83E-07 | -5.31011 | Down | solute carrier family 16 member 12                   |
| LBX2-AS1     | -1.06837 | 1.15E-14 | 1.05E-12 | -7.7214  | Down | LBX2 antisense RNA 1                                 |
| INSRR        | -1.06702 | 1.52E-06 | 9.03E-06 | -4.80912 | Down | insulin receptor related receptor                    |
| ESPNL        | -1.06388 | 2.79E-10 | 5.29E-09 | -6.31023 | Down | espin like                                           |
| CXCR3        | -1.06066 | 0.001008 | 0.002864 | -3.28824 | Down | C-X-C motif chemokine receptor 3                     |
| SLC6A12      | -1.05294 | 7.94E-26 | 1.94E-21 | -10.5079 | Down | solute carrier family 6 member 12                    |
| UBD          | -1.05052 | 3.43E-06 | 1.86E-05 | -4.64337 | Down | ubiquitin D                                          |
| SLC22A8      | -1.04807 | 0.000734 | 0.002165 | -3.37659 | Down | solute carrier family 22 member 8                    |
| PROK2        | -1.04774 | 3.45E-09 | 4.57E-08 | -5.90839 | Down | prokineticin 2                                       |
| BCAR4        | -1.04744 | 8.90E-05 | 0.000332 | -3.91876 | Down | breast cancer anti-estrogen resistance 4             |
| F2RL3        | -1.0461  | 5.42E-06 | 2.79E-05 | -4.54797 | Down | F2R like thrombin or trypsin receptor 3              |
| DIO3OS       | -1.03974 | 2.55E-10 | 4.93E-09 | -6.32373 | Down | DIO3 opposite strand upstream RNA                    |
| SNORA51      | -1.03814 | 0.000115 | 0.000416 | -3.85711 | Down | small nucleolar RNA, H/ACA box 51                    |
| SLC16A12-AS1 | -1.03812 | 0.016377 | 0.033273 | -2.40039 | Down | SLC16A12 antisense RNA 1                             |
| FOXD1        | -1.03811 | 9.48E-17 | 1.98E-14 | -8.3111  | Down | forkhead box D1                                      |
| SLC23A3      | -1.03762 | 3.70E-14 | 2.78E-12 | -7.57109 | Down | solute carrier family 23 member 3                    |
| CLEC18A      | -1.02711 | 0.000212 | 0.000717 | -3.70419 | Down | C-type lectin domain family 18 member A              |
| LUCAT1       | -1.02365 | 1.05E-06 | 6.56E-06 | -4.88175 | Down | lung cancer associated transcript 1                  |
| C1QTNF1-AS1  | -1.02237 | 0.000624 | 0.001878 | -3.42083 | Down | C1QTNF1 antisense RNA 1                              |
| NXPE4        | -1.02124 | 0.002617 | 0.006672 | -3.00947 | Down | neurexophilin and PC-esterase domain family member 4 |
| GATA3        | -1.02116 | 0.000132 | 0.000471 | -3.82287 | Down | GATA binding protein 3                               |
| FAM205A      | -1.01575 | 6.74E-05 | 0.000261 | -3.9852  | Down | family with sequence similarity 205 member A         |
| SHISA3       | -1.01357 | 6.85E-10 | 1.14E-08 | -6.16941 | Down | shisa family member 3                                |
| TBX15        | -1.01045 | 2.80E-15 | 3.39E-13 | -7.89934 | Down | T-box transcription factor 15                        |
| MYRF-AS1     | -1.01028 | 2.42E-09 | 3.35E-08 | -5.96703 | Down | MYRF antisense RNA 1                                 |
| CXCL8        | -1.00794 | 2.95E-08 | 2.84E-07 | -5.5442  | Down | C-X-C motif chemokine ligand 8                       |
| CKM          | -1.00756 | 1.03E-07 | 8.41E-07 | -5.32076 | Down | creatine kinase, M-type                              |
| FOXC2        | -1.00696 | 9.44E-12 | 2.99E-10 | -6.81474 | Down | forkhead box C2                                      |
| C7orf61      | -1.0067  | 6.47E-10 | 1.09E-08 | -6.17844 | Down | chromosome 7 open reading frame 61                   |
| MKI67        | -1.00097 | 1.84E-05 | 8.28E-05 | -4.28356 | Down | marker of proliferation Ki-67                        |
| PYHIN1       | -0.99769 | 2.99E-06 | 1.65E-05 | -4.67144 | Down | pyrin and HIN domain family member 1                 |
| COL1A2       | -0.99733 | 2.92E-17 | 7.32E-15 | -8.44981 | Down | collagen type I alpha 2 chain                        |
| GIPR         | -0.98922 | 1.74E-10 | 3.58E-09 | -6.38237 | Down | gastric inhibitory polypeptide receptor              |
| SLCO4A1-AS1  | -0.98892 | 1.46E-09 | 2.17E-08 | -6.0484  | Down | SLCO4A1 antisense RNA 1                              |
| FOXD2        | -0.98832 | 6.68E-12 | 2.25E-10 | -6.86432 | Down | forkhead box D2                                      |
| CD2          | -0.98199 | 5.68E-07 | 3.80E-06 | -5.0017  | Down | CD2 molecule                                         |



|           |          |          |          |          |      |                                                   |
|-----------|----------|----------|----------|----------|------|---------------------------------------------------|
| LCK       | -0.98101 | 4.01E-08 | 3.72E-07 | -5.49042 | Down | LCK proto-oncogene, Src family tyrosine kinase    |
| SNORD16   | -0.97848 | 4.87E-06 | 2.53E-05 | -4.57029 | Down | small nucleolar RNA, C/D box 16                   |
| TNFRSF10D | -0.97444 | 3.42E-13 | 1.76E-11 | -7.27681 | Down | TNF receptor superfamily member 10d               |
| NUP210L   | -0.97332 | 7.43E-12 | 2.45E-10 | -6.84906 | Down | nucleoporin 210 like                              |
| ALOX15B   | -0.97229 | 8.31E-09 | 9.54E-08 | -5.76196 | Down | arachidonate 15-lipoxygenase type B               |
| FOXD2-AS1 | -0.97193 | 6.73E-14 | 4.55E-12 | -7.49305 | Down | FOXD2 adjacent opposite strand RNA 1              |
| RGS1      | -0.96924 | 1.88E-05 | 8.43E-05 | -4.27843 | Down | regulator of G protein signaling 1                |
| FMO1      | -0.96835 | 1.67E-06 | 9.80E-06 | -4.7903  | Down | flavin containing dimethylanilinemonooxygenase 1  |
| OLFM5P    | -0.96282 | 2.55E-06 | 1.43E-05 | -4.70399 | Down | olfactomedin family member 5, pseudogene          |
| HOXB3     | -0.9627  | 6.99E-07 | 4.56E-06 | -4.96172 | Down | homeobox B3                                       |
| ARHGEF35  | -0.96261 | 0.006737 | 0.015254 | -2.70958 | Down | Rho guanine nucleotide exchange factor 35         |
| SIK1      | -0.9609  | 0.000179 | 0.000618 | -3.74665 | Down | salt inducible kinase 1                           |
| H2AC12    | -0.95989 | 0.009466 | 0.02055  | -2.59477 | Down | H2A clustered histone 12                          |
| LCN10     | -0.95972 | 1.75E-07 | 1.33E-06 | -5.22385 | Down | lipocalin 10                                      |
| UHRF1     | -0.95876 | 5.57E-15 | 5.94E-13 | -7.8133  | Down | ubiquitin like with PHD and ring finger domains 1 |
| FOXD3     | -0.9583  | 0.0021   | 0.005487 | -3.07569 | Down | forkhead box D3                                   |
| UBASH3A   | -0.95823 | 0.000975 | 0.002779 | -3.29761 | Down | ubiquitin associated and SH3 domain containing A  |
| HSPB7     | -0.95559 | 8.47E-20 | 6.46E-17 | -9.10693 | Down | heat shock protein family B (small) member 7      |
| ABCA6     | -0.95498 | 3.37E-07 | 2.39E-06 | -5.10137 | Down | ATP binding cassette subfamily A member 6         |
| SMTN      | -0.95308 | 1.83E-19 | 1.17E-16 | -9.02322 | Down | smoothelin                                        |
| SNORD124  | -0.953   | 8.74E-08 | 7.25E-07 | -5.35122 | Down | small nucleolar RNA, C/D box 124                  |
| GHRHR     | -0.95292 | 0.011363 | 0.024151 | -2.53133 | Down | growth hormone releasing hormone receptor         |
| FFAR2     | -0.951   | 7.32E-05 | 0.00028  | -3.9655  | Down | free fatty acid receptor 2                        |
| SERPINH1  | -0.95047 | 8.73E-08 | 7.24E-07 | -5.35139 | Down | serpin family H member 1                          |
| IL24      | -0.94784 | 7.32E-05 | 0.00028  | -3.96574 | Down | interleukin 24                                    |
| HCAR3     | -0.94742 | 2.61E-05 | 0.000113 | -4.20512 | Down | hydroxycarboxylic acid receptor 3                 |
| OR2B6     | -0.94698 | 0.007691 | 0.017131 | -2.66534 | Down | olfactory receptor family 2 subfamily B member 6  |
| SNORA28   | -0.94565 | 0.000891 | 0.002568 | -3.32281 | Down | small nucleolar RNA, H/ACA box 28                 |
| HIGD1B    | -0.94489 | 2.52E-15 | 3.09E-13 | -7.91262 | Down | HIG1 hypoxia inducible domain family member 1B    |
| CCDC102A  | -0.94457 | 4.60E-18 | 1.67E-15 | -8.66292 | Down | coiled-coil domain containing 102A                |
| GPR15     | -0.94455 | 0.003696 | 0.009017 | -2.90299 | Down | G protein-coupled receptor 15                     |
| FAM106B   | -0.94409 | 3.48E-05 | 0.000145 | -4.13966 | Down | family with sequence similarity 106 member B      |
| GJA4      | -0.9434  | 9.38E-13 | 4.22E-11 | -7.13928 | Down | gap junction protein alpha 4                      |
| MMRN1     | -0.93931 | 1.22E-07 | 9.72E-07 | -5.29    | Down | multimerin 1                                      |
| CLEC4D    | -0.93808 | 0.000134 | 0.000478 | -3.81828 | Down | C-type lectin domain family 4 member D            |
| MT1JP     | -0.93667 | 1.01E-06 | 6.31E-06 | -4.89064 | Down | metallothionein 1J, pseudogene                    |
| REM1      | -0.93542 | 1.03E-08 | 1.15E-07 | -5.7253  | Down | RRAD and GEM like GTPase 1                        |
| CST7      | -0.93518 | 7.52E-08 | 6.38E-07 | -5.37832 | Down | cystatin F                                        |
| HCCAT5    | -0.93436 | 0.000302 | 0.000986 | -3.61319 | Down | hepatocellular carcinoma associated transcript 5  |
| COL8A1    | -0.93122 | 1.65E-06 | 9.72E-06 | -4.79271 | Down | collagen type VIII alpha 1 chain                  |
| WNT6      | -0.93084 | 9.58E-12 | 3.02E-10 | -6.81274 | Down | Wnt family member 6                               |
| SH2D3A    | -0.92951 | 1.98E-11 | 5.60E-10 | -6.70758 | Down | SH2 domain containing 3A                          |
| TRNE      | -0.92948 | 1.56E-06 | 9.28E-06 | -4.8032  | Down | tRNA                                              |

|             |          |          |          |          |      |                                                            |
|-------------|----------|----------|----------|----------|------|------------------------------------------------------------|
| TRNQ        | -0.92916 | 1.74E-06 | 1.02E-05 | -4.78105 | Down | tRNA                                                       |
| FMO3        | -0.92748 | 9.98E-13 | 4.44E-11 | -7.13084 | Down | flavin containing dimethylanilinemonooxygenase 3           |
| TEX43       | -0.92694 | 1.88E-05 | 8.42E-05 | -4.2788  | Down | testis expressed 43                                        |
| HSPB1       | -0.92535 | 5.06E-08 | 4.53E-07 | -5.44915 | Down | heat shock protein family B (small) member 1               |
| ECM2        | -0.9229  | 8.93E-08 | 7.38E-07 | -5.34718 | Down | extracellular matrix protein 2                             |
| HRH4        | -0.91793 | 7.52E-06 | 3.75E-05 | -4.47835 | Down | histamine receptor H4                                      |
| HOXB-AS1    | -0.9143  | 5.79E-05 | 0.000228 | -4.02113 | Down | HOXB cluster antisense RNA 1                               |
| HSPA1A      | -0.914   | 5.81E-05 | 0.000228 | -4.02048 | Down | heat shock protein family A (Hsp70) member 1A              |
| FOXC2-AS1   | -0.91312 | 1.33E-06 | 8.04E-06 | -4.83577 | Down | FOXC2 antisense RNA 1                                      |
| CD177       | -0.91302 | 0.000313 | 0.001016 | -3.6044  | Down | CD177 molecule                                             |
| ADAM33      | -0.91131 | 1.91E-19 | 1.19E-16 | -9.01836 | Down | ADAM metallopeptidase domain 33                            |
| PEAR1       | -0.91122 | 1.53E-12 | 6.38E-11 | -7.07184 | Down | platelet endothelial aggregation receptor 1                |
| TBX3        | -0.90827 | 1.14E-14 | 1.04E-12 | -7.72295 | Down | T-box transcription factor 3                               |
| TCN1        | -0.90727 | 0.003681 | 0.008986 | -2.90427 | Down | transcobalamin 1                                           |
| OIT3        | -0.90614 | 0.000955 | 0.002732 | -3.30348 | Down | oncprotein induced transcript 3                            |
| MAFF        | -0.90563 | 2.04E-11 | 5.73E-10 | -6.70312 | Down | MAF bZIP transcription factor F                            |
| LY9         | -0.90486 | 3.09E-05 | 0.000131 | -4.16704 | Down | lymphocyte antigen 9                                       |
| SLCO4A1     | -0.90466 | 2.61E-10 | 5.03E-09 | -6.32022 | Down | solute carrier organic anion transporter family member 4A1 |
| FAM170B-AS1 | -0.90431 | 0.002954 | 0.007419 | -2.97251 | Down | FAM170B antisense RNA 1                                    |
| UBQLNL      | -0.90192 | 2.32E-08 | 2.32E-07 | -5.5859  | Down | ubiquilin like                                             |
| SNORD15A    | -0.90159 | 0.001077 | 0.003037 | -3.26956 | Down | small nucleolar RNA, C/D box 15A                           |
| FHL5        | -0.89902 | 2.41E-09 | 3.35E-08 | -5.96714 | Down | four and a half LIM domains 5                              |
| ABCC2       | -0.89852 | 3.06E-13 | 1.61E-11 | -7.29184 | Down | ATP binding cassette subfamily C member 2                  |
| VAV3-AS1    | -0.8985  | 0.007239 | 0.016248 | -2.68564 | Down | VAV3 antisense RNA 1                                       |
| OR2A7       | -0.89701 | 0.002863 | 0.007216 | -2.98206 | Down | olfactory receptor family 2 subfamily A member 7           |
| LILRA4      | -0.89674 | 4.10E-10 | 7.34E-09 | -6.25006 | Down | leukocyte immunoglobulin like receptor A4                  |
| FRG1EP      | -0.89265 | 0.010903 | 0.023299 | -2.54579 | Down | FSHD region gene 1 family member E, pseudogene             |
| TRNI        | -0.89223 | 3.35E-06 | 1.82E-05 | -4.64808 | Down | tRNA                                                       |
| FOXJ1       | -0.89173 | 2.00E-07 | 1.50E-06 | -5.19969 | Down | forkhead box J1                                            |
| NOTCH3      | -0.8893  | 2.17E-16 | 3.98E-14 | -8.21232 | Down | notch receptor 3                                           |
| ITGA11      | -0.8888  | 2.30E-22 | 6.25E-19 | -9.7274  | Down | integrin subunit alpha 11                                  |
| TEAD2       | -0.88575 | 1.44E-17 | 4.08E-15 | -8.53197 | Down | TEA domain transcription factor 2                          |
| DDX12P      | -0.88421 | 1.95E-09 | 2.79E-08 | -6.00189 | Down | DEAD/H-box helicase 12, pseudogene                         |
| GATA2-AS1   | -0.88359 | 2.77E-12 | 1.04E-10 | -6.98902 | Down | GATA2 antisense RNA 1                                      |
| SLC13A4     | -0.88239 | 1.41E-09 | 2.10E-08 | -6.05486 | Down | solute carrier family 13 member 4                          |
| FNDC11      | -0.88215 | 1.34E-07 | 1.05E-06 | -5.27392 | Down | fibronectin type III domain containing 11                  |
| NUTM2G      | -0.8813  | 0.000307 | 0.000999 | -3.60931 | Down | NUT family member 2G                                       |
| PCDH18      | -0.88027 | 1.85E-12 | 7.44E-11 | -7.04513 | Down | protocadherin 18                                           |
| LEF1-AS1    | -0.88016 | 6.85E-11 | 1.60E-09 | -6.52381 | Down | LEF1 antisense RNA 1                                       |
| C6          | -0.87705 | 0.000701 | 0.002078 | -3.38906 | Down | complement C6                                              |
| PITX1       | -0.87501 | 0.01508  | 0.030899 | -2.43046 | Down | paired like homeodomain 1                                  |
| LYZ         | -0.87431 | 3.97E-06 | 2.12E-05 | -4.61275 | Down | lysozyme                                                   |
| TGFB1I1     | -0.8728  | 4.64E-18 | 1.67E-15 | -8.6619  | Down | transforming growth factor beta 1 induced transcript 1     |

|             |          |          |          |          |      |                                                   |
|-------------|----------|----------|----------|----------|------|---------------------------------------------------|
| TMCC2-AS1   | -0.87275 | 2.52E-05 | 0.000109 | -4.21269 | Down | TMCC2 antisense RNA 1                             |
| P2RX7       | -0.87155 | 3.63E-10 | 6.60E-09 | -6.26933 | Down | purinergic receptor P2X 7                         |
| OTP         | -0.871   | 0.008237 | 0.018173 | -2.6422  | Down | orthopediahomeobox                                |
| HIC1        | -0.86948 | 9.95E-14 | 6.26E-12 | -7.4416  | Down | HIC ZBTB transcriptional repressor 1              |
| CLDN15      | -0.86829 | 1.83E-18 | 8.11E-16 | -8.76738 | Down | claudin 15                                        |
| SCT         | -0.86732 | 5.42E-06 | 2.79E-05 | -4.54771 | Down | secretin                                          |
| ABCC3       | -0.86614 | 1.08E-12 | 4.80E-11 | -7.11931 | Down | ATP binding cassette subfamily C member 3         |
| ZBED6       | -0.86609 | 0.00011  | 0.0004   | -3.86804 | Down | zinc finger BED-type containing 6                 |
| RNU4-2      | -0.86535 | 0.001127 | 0.00316  | -3.25671 | Down | RNA, U4 small nuclear 2                           |
| IL3RA       | -0.86507 | 6.76E-10 | 1.13E-08 | -6.17157 | Down | interleukin 3 receptor subunit alpha              |
| SNORD14C    | -0.86393 | 2.24E-06 | 1.27E-05 | -4.73022 | Down | small nucleolar RNA, C/D box 14C                  |
| TRNM        | -0.86364 | 5.16E-07 | 3.49E-06 | -5.02016 | Down | tRNA                                              |
| NCKAP5-AS1  | -0.86291 | 0.008386 | 0.018445 | -2.63613 | Down | NCKAP5 antisense RNA 1                            |
| CD3E        | -0.86258 | 1.65E-06 | 9.74E-06 | -4.79232 | Down | CD3e molecule                                     |
| LCN6        | -0.86132 | 3.45E-08 | 3.25E-07 | -5.51715 | Down | lipocalin 6                                       |
| NGFR        | -0.86118 | 1.24E-09 | 1.88E-08 | -6.07518 | Down | nerve growth factor receptor                      |
| FLJ20712    | -0.85686 | 0.003125 | 0.0078   | -2.95516 | Down | uncharacterized FLJ20712                          |
| TBX2-AS1    | -0.8554  | 1.64E-12 | 6.75E-11 | -7.06215 | Down | TBX2 antisense RNA 1                              |
| MLANA       | -0.85393 | 3.97E-11 | 1.01E-09 | -6.6052  | Down | melan-A                                           |
| SNORD14E    | -0.8531  | 9.23E-06 | 4.49E-05 | -4.43455 | Down | small nucleolar RNA, C/D box 14E                  |
| CSNK1G2-AS1 | -0.85278 | 0.001135 | 0.003178 | -3.25481 | Down | CSNK1G2 antisense RNA 1                           |
| REP15       | -0.85245 | 6.91E-12 | 2.31E-10 | -6.85953 | Down | RAB15 effector protein                            |
| C10orf126   | -0.85236 | 0.022573 | 0.044018 | -2.28058 | Down | chromosome 10 open reading frame 126              |
| DDX11L2     | -0.852   | 5.75E-06 | 2.94E-05 | -4.53535 | Down | DEAD/H-box helicase 11 like 2 (pseudogene)        |
| THRB-AS2    | -0.85098 | 6.08E-06 | 3.09E-05 | -4.52373 | Down | THRB antisense RNA 2                              |
| ANPEP       | -0.85061 | 1.33E-12 | 5.62E-11 | -7.09111 | Down | alanylaminopeptidase, membrane                    |
| ZBTB46-AS1  | -0.85052 | 0.002039 | 0.005346 | -3.08444 | Down | ZBTB46 antisense RNA 1                            |
| MYBPH       | -0.84995 | 4.80E-06 | 2.49E-05 | -4.57354 | Down | myosin binding protein H                          |
| KANK2       | -0.84932 | 1.28E-24 | 1.56E-20 | -10.2424 | Down | KN motif and ankyrin repeat domains 2             |
| RUNX3       | -0.84762 | 1.45E-12 | 6.08E-11 | -7.07924 | Down | RUNX family transcription factor 3                |
| GDF15       | -0.8465  | 1.71E-08 | 1.78E-07 | -5.63934 | Down | growth differentiation factor 15                  |
| GZMM        | -0.84577 | 3.20E-10 | 5.94E-09 | -6.28887 | Down | granzyme M                                        |
| CR1         | -0.84522 | 2.00E-08 | 2.05E-07 | -5.61182 | Down | complement C3b/C4b receptor 1 (Knops blood group) |
| CCDC168     | -0.84361 | 5.92E-08 | 5.18E-07 | -5.42109 | Down | coiled-coil domain containing 168                 |
| ANGPT2      | -0.84323 | 1.09E-07 | 8.82E-07 | -5.31047 | Down | angiopoietin 2                                    |
| GMNC        | -0.84319 | 0.000345 | 0.001108 | -3.57902 | Down | geminin coiled-coil domain containing             |
| JAML        | -0.8413  | 1.06E-08 | 1.18E-07 | -5.72075 | Down | junction adhesion molecule like                   |
| TBX18       | -0.84089 | 2.55E-11 | 6.90E-10 | -6.67049 | Down | T-box transcription factor 18                     |
| BOK-AS1     | -0.84085 | 1.62E-06 | 9.60E-06 | -4.7956  | Down | BOK antisense RNA 1                               |
| IL2RB       | -0.83988 | 1.71E-06 | 1.00E-05 | -4.7855  | Down | interleukin 2 receptor subunit beta               |
| MGAM        | -0.83938 | 1.01E-08 | 1.13E-07 | -5.72883 | Down | maltase-glucoamylase                              |
| MS4A14      | -0.83869 | 5.46E-10 | 9.41E-09 | -6.20536 | Down | membrane spanning 4-domains A14                   |
| TRIP10      | -0.83791 | 2.56E-16 | 4.46E-14 | -8.19256 | Down | thyroid hormone receptor interactor 10            |

|            |          |          |          |          |      |                                                                      |
|------------|----------|----------|----------|----------|------|----------------------------------------------------------------------|
| SPACA6P-AS | -0.83566 | 6.61E-16 | 9.78E-14 | -8.07749 | Down | SPACA6P antisense RNA                                                |
| SLAMF6     | -0.83513 | 4.60E-05 | 0.000185 | -4.0753  | Down | SLAM family member 6                                                 |
| PLN        | -0.83484 | 7.09E-06 | 3.55E-05 | -4.4909  | Down | phospholamban                                                        |
| LYG2       | -0.83453 | 1.02E-07 | 8.34E-07 | -5.32258 | Down | lysozyme g2                                                          |
| TNFSF14    | -0.83408 | 7.32E-07 | 4.76E-06 | -4.95272 | Down | TNF superfamily member 14                                            |
| TBX6       | -0.83237 | 1.40E-18 | 6.46E-16 | -8.79725 | Down | T-box transcription factor 6                                         |
| RNR1       | -0.83128 | 5.94E-06 | 3.03E-05 | -4.52837 | Down | s-rRNA                                                               |
| SIX1       | -0.83066 | 2.94E-08 | 2.84E-07 | -5.54475 | Down | SIX homeobox 1                                                       |
| HOXB6      | -0.83022 | 0.017776 | 0.035771 | -2.37026 | Down | homeobox B6                                                          |
| ONECUT1    | -0.82866 | 0.000437 | 0.001371 | -3.51653 | Down | one cut homeobox 1                                                   |
| CEACAM1    | -0.82649 | 7.18E-09 | 8.38E-08 | -5.78676 | Down | CEA cell adhesion molecule 1                                         |
| PRELP      | -0.82459 | 1.09E-16 | 2.19E-14 | -8.2943  | Down | proline and arginine rich end leucine rich repeat protein            |
| C21orf62   | -0.82451 | 2.49E-08 | 2.46E-07 | -5.5741  | Down | chromosome 21 open reading frame 62                                  |
| SYNE3      | -0.82438 | 4.71E-12 | 1.65E-10 | -6.91416 | Down | spectrin repeat containing nuclear envelope family member 3          |
| DKKL1      | -0.82313 | 7.75E-06 | 3.85E-05 | -4.47209 | Down | dickkopf like acrosomal protein 1                                    |
| ZNF683     | -0.82275 | 0.000993 | 0.002823 | -3.29263 | Down | zinc finger protein 683                                              |
| CCL14      | -0.82228 | 0.000116 | 0.00042  | -3.85432 | Down | C-C motif chemokine ligand 14                                        |
| AEBP1      | -0.82205 | 1.70E-11 | 4.95E-10 | -6.72939 | Down | AE binding protein 1                                                 |
| PACRG-AS3  | -0.822   | 3.81E-10 | 6.89E-09 | -6.26174 | Down | PACRG antisense RNA 3                                                |
| RRAD       | -0.82142 | 9.02E-08 | 7.44E-07 | -5.34544 | Down | RRAD, Ras related glycolysis inhibitor and calcium channel regulator |
| TLR8       | -0.8185  | 4.25E-05 | 0.000172 | -4.09368 | Down | toll like receptor 8                                                 |
| GPRC5A     | -0.81821 | 3.75E-06 | 2.01E-05 | -4.62484 | Down | G protein-coupled receptor class C group 5 member A                  |
| IL18RAP    | -0.81741 | 2.83E-06 | 1.57E-05 | -4.68265 | Down | interleukin 18 receptor accessory protein                            |
| P2RY14     | -0.81545 | 4.12E-09 | 5.29E-08 | -5.87928 | Down | purinergic receptor P2Y14                                            |
| BLK        | -0.81529 | 0.008186 | 0.018073 | -2.64431 | Down | BLK proto-oncogene, Src family tyrosine kinase                       |
| ADH1B      | -0.81442 | 7.71E-09 | 8.93E-08 | -5.77461 | Down | alcohol dehydrogenase 1B (class I), beta polypeptide                 |
| HSPB9      | -0.81341 | 2.38E-06 | 1.34E-05 | -4.71838 | Down | heat shock protein family B (small) member 9                         |
| VNN1       | -0.81265 | 5.93E-05 | 0.000232 | -4.01575 | Down | vanin 1                                                              |
| LILRP2     | -0.81264 | 0.025542 | 0.048927 | -2.2331  | Down | leukocyte immunoglobulin-like receptor pseudogene 2                  |
| SH2D6      | -0.81251 | 5.74E-12 | 1.98E-10 | -6.88598 | Down | SH2 domain containing 6                                              |
| LILRB5     | -0.81118 | 4.60E-07 | 3.15E-06 | -5.04219 | Down | leukocyte immunoglobulin like receptor B5                            |
| OR51E1     | -0.80785 | 0.000353 | 0.001132 | -3.5728  | Down | olfactory receptor family 51 subfamily E member 1                    |
| AOC1       | -0.80766 | 0.023396 | 0.045401 | -2.26691 | Down | amine oxidase copper containing 1                                    |
| GPR4       | -0.80745 | 5.78E-09 | 7.00E-08 | -5.82288 | Down | G protein-coupled receptor 4                                         |
| ADORA2A    | -0.80735 | 1.74E-14 | 1.46E-12 | -7.66847 | Down | adenosine A2a receptor                                               |
| FSCN3      | -0.80712 | 0.00035  | 0.001124 | -3.57488 | Down | fascin actin-bundling protein 3                                      |
| AZGP1      | -0.80586 | 1.40E-07 | 1.10E-06 | -5.26492 | Down | alpha-2-glycoprotein 1, zinc-binding                                 |
| MRGPRF-AS1 | -0.80565 | 0.000112 | 0.000407 | -3.86317 | Down | MRGPRF antisense RNA 1                                               |
| ITGA5      | -0.80399 | 1.21E-12 | 5.21E-11 | -7.10459 | Down | integrin subunit alpha 5                                             |
| FOXF1      | -0.80311 | 2.48E-11 | 6.71E-10 | -6.67463 | Down | forkhead box F1                                                      |
| ADGRG3     | -0.80191 | 3.22E-05 | 0.000135 | -4.15719 | Down | adhesion G protein-coupled receptor G3                               |
| TNIP2P1    | -0.80145 | 0.002166 | 0.005639 | -3.06642 | Down | TNIP2 pseudogene 1                                                   |

|             |          |          |          |          |      |                                                       |
|-------------|----------|----------|----------|----------|------|-------------------------------------------------------|
| E2F2        | -0.79846 | 0.000575 | 0.001748 | -3.44334 | Down | E2F transcription factor 2                            |
| FAM41C      | -0.79713 | 0.004294 | 0.010268 | -2.8557  | Down | family with sequence similarity 41 member C           |
| LNCAROD     | -0.79532 | 0.018256 | 0.036595 | -2.36039 | Down | lncRNA activating regulator of DKK1                   |
| SLC4A11     | -0.79416 | 3.00E-13 | 1.58E-11 | -7.29432 | Down | solute carrier family 4 member 11                     |
| COL1A1      | -0.79324 | 4.12E-09 | 5.29E-08 | -5.87915 | Down | collagen type I alpha 1 chain                         |
| SNRPD2P2    | -0.79316 | 0.000911 | 0.002619 | -3.31666 | Down | small nuclear ribonucleoprotein D2 pseudogene 2       |
| IQGAP2      | -0.7923  | 2.87E-08 | 2.78E-07 | -5.549   | Down | IQ motif containing GTPase activating protein 2       |
| WFDC21P     | -0.79198 | 0.000829 | 0.002413 | -3.34309 | Down | WAP four-disulfide core domain 21, pseudogene         |
| PLEKHA4     | -0.79029 | 2.69E-11 | 7.23E-10 | -6.66277 | Down | pleckstrin homology domain containing A4              |
| TM4SF18     | -0.78902 | 3.83E-09 | 4.98E-08 | -5.8913  | Down | transmembrane 4 L six family member 18                |
| FOLR3       | -0.78898 | 0.004717 | 0.011152 | -2.82573 | Down | folate receptor gamma                                 |
| CTB-41I6.1  | -0.78862 | 4.18E-07 | 2.89E-06 | -5.06079 | Down | uncharacterized CTB-41I6.1                            |
| PSORS1C3    | -0.78843 | 0.009943 | 0.021458 | -2.5778  | Down | psoriasis susceptibility 1 candidate 3                |
| ADM2        | -0.78809 | 3.01E-05 | 0.000128 | -4.17262 | Down | adrenomedullin 2                                      |
| BCL6B       | -0.78762 | 4.45E-09 | 5.64E-08 | -5.86647 | Down | BCL6B transcription repressor                         |
| H4C5        | -0.78754 | 3.89E-08 | 3.62E-07 | -5.49557 | Down | H4 clustered histone 5                                |
| NFE2        | -0.78705 | 5.21E-08 | 4.64E-07 | -5.44409 | Down | nuclear factor, erythroid 2                           |
| ADRA2B      | -0.78637 | 5.44E-11 | 1.31E-09 | -6.55848 | Down | adrenoceptor alpha 2B                                 |
| LDLRAD4-AS1 | -0.78437 | 2.14E-06 | 1.22E-05 | -4.73956 | Down | LDLRAD4 antisense RNA 1                               |
| FCRLA       | -0.78113 | 1.02E-06 | 6.40E-06 | -4.88715 | Down | Fc receptor like A                                    |
| COL3A1      | -0.78106 | 2.55E-07 | 1.87E-06 | -5.15363 | Down | collagen type III alpha 1 chain                       |
| C22orf34    | -0.78074 | 4.39E-08 | 4.00E-07 | -5.47456 | Down | chromosome 22 putative open reading frame 34          |
| C11orf52    | -0.78057 | 2.73E-10 | 5.20E-09 | -6.31337 | Down | chromosome 11 open reading frame 52                   |
| IFNA2       | -0.77921 | 1.29E-05 | 6.07E-05 | -4.36211 | Down | interferon alpha 2                                    |
| RCVRN       | -0.77891 | 1.12E-05 | 5.37E-05 | -4.3918  | Down | recoverin                                             |
| ND6         | -0.77825 | 8.04E-06 | 3.97E-05 | -4.46422 | Down | NADH dehydrogenase subunit 6                          |
| CHRNA3      | -0.77788 | 0.004243 | 0.010168 | -2.85949 | Down | cholinergic receptor nicotinic gamma subunit          |
| ZNF750      | -0.77642 | 5.52E-06 | 2.84E-05 | -4.54382 | Down | zinc finger protein 750                               |
| COL8A2      | -0.77525 | 4.61E-11 | 1.14E-09 | -6.58293 | Down | collagen type VIII alpha 2 chain                      |
| PSG8-AS1    | -0.77385 | 1.01E-08 | 1.13E-07 | -5.72902 | Down | PSG8 antisense RNA 1                                  |
| OLAH        | -0.77126 | 3.61E-10 | 6.58E-09 | -6.26994 | Down | oleoyl-ACP hydrolase                                  |
| KLHL30      | -0.77107 | 5.60E-06 | 2.87E-05 | -4.54114 | Down | kelch like family member 30                           |
| FCRL3       | -0.77106 | 0.010255 | 0.022058 | -2.56711 | Down | Fc receptor like 3                                    |
| COL27A1     | -0.77091 | 2.08E-22 | 6.25E-19 | -9.73797 | Down | collagen type XXVII alpha 1 chain                     |
| GPER1       | -0.77045 | 7.81E-13 | 3.60E-11 | -7.16447 | Down | G protein-coupled estrogen receptor 1                 |
| LGSN        | -0.76926 | 0.012727 | 0.026688 | -2.49132 | Down | lensin, lens protein with glutamine synthetase domain |
| OR5K2       | -0.76715 | 0.000448 | 0.001401 | -3.51007 | Down | olfactory receptor family 5 subfamily K member 2      |
| ACAN        | -0.76684 | 1.23E-09 | 1.87E-08 | -6.07691 | Down | aggrecan                                              |
| KLRB1       | -0.76667 | 0.000101 | 0.00037  | -3.88921 | Down | killer cell lectin like receptor B1                   |
| IGF2        | -0.76347 | 6.22E-11 | 1.48E-09 | -6.53834 | Down | insulin like growth factor 2                          |
| SNORD56     | -0.763   | 2.79E-05 | 0.00012  | -4.18991 | Down | small nucleolar RNA, C/D box 56                       |
| FRRS1       | -0.76197 | 0.000342 | 0.0011   | -3.5811  | Down | ferric chelate reductase 1                            |
| CRYBG2      | -0.76179 | 0.002757 | 0.006982 | -2.99362 | Down | crystallin beta-gamma domain containing 2             |

|           |          |          |          |          |      |                                                           |
|-----------|----------|----------|----------|----------|------|-----------------------------------------------------------|
| PRLR      | -0.76159 | 2.19E-07 | 1.63E-06 | -5.18203 | Down | prolactin receptor                                        |
| H2AC6     | -0.75997 | 1.43E-09 | 2.13E-08 | -6.05157 | Down | H2A clustered histone 6                                   |
| BTN1A1    | -0.75982 | 0.000458 | 0.00143  | -3.50395 | Down | butyrophilin subfamily 1 member A1                        |
| S1PR4     | -0.75956 | 3.24E-11 | 8.46E-10 | -6.63535 | Down | sphingosine-1-phosphate receptor 4                        |
| TGM4      | -0.75775 | 0.003586 | 0.008785 | -2.91249 | Down | transglutaminase 4                                        |
| INS-IGF2  | -0.75742 | 8.98E-11 | 2.03E-09 | -6.4832  | Down | INS-IGF2 readthrough                                      |
| FCGR2B    | -0.7568  | 5.08E-05 | 0.000202 | -4.05171 | Down | Fc fragment of IgG receptor IIb                           |
| DNAJB1    | -0.75597 | 1.59E-05 | 7.28E-05 | -4.31622 | Down | DnaJ heat shock protein family (Hsp40) member B1          |
| NFE4      | -0.75363 | 0.016524 | 0.033546 | -2.39713 | Down | nuclear factor, erythroid 4                               |
| CFHR3     | -0.7536  | 0.000541 | 0.001658 | -3.45958 | Down | complement factor H related 3                             |
| MID1IP1   | -0.75357 | 2.44E-14 | 1.95E-12 | -7.62489 | Down | MID1 interacting protein 1                                |
| CLYBL-AS2 | -0.75322 | 0.014747 | 0.030308 | -2.43854 | Down | CLYBL antisense RNA 2                                     |
| MMP9      | -0.75305 | 0.000106 | 0.000387 | -3.8772  | Down | matrix metalloproteinase 9                                |
| FANCC     | -0.75292 | 8.78E-23 | 3.06E-19 | -9.82506 | Down | FA complementation group C                                |
| VNN2      | -0.75244 | 0.000124 | 0.000444 | -3.83887 | Down | vanin 2                                                   |
| PRKX      | -0.7511  | 3.52E-14 | 2.69E-12 | -7.57766 | Down | protein kinase X-linked                                   |
| TNFRSF10A | -0.75101 | 2.30E-06 | 1.30E-05 | -4.72524 | Down | TNF receptor superfamily member 10a                       |
| MAGEA12   | -0.74908 | 1.65E-07 | 1.26E-06 | -5.23469 | Down | MAGE family member A12                                    |
| ZNF878    | -0.74846 | 1.15E-07 | 9.22E-07 | -5.30076 | Down | zinc finger protein 878                                   |
| SLC12A7   | -0.74703 | 6.97E-16 | 1.03E-13 | -8.07099 | Down | solute carrier family 12 member 7                         |
| SYDE1     | -0.74675 | 4.47E-18 | 1.65E-15 | -8.66627 | Down | synapse defective Rho GTPase homolog 1                    |
| TGFBI     | -0.74625 | 5.99E-07 | 3.98E-06 | -4.99161 | Down | transforming growth factor beta induced                   |
| LPEQ6126  | -0.74623 | 0.000247 | 0.000822 | -3.66551 | Down | uncharacterized LOC100128818                              |
| TLR5      | -0.74528 | 2.11E-09 | 2.98E-08 | -5.98924 | Down | toll like receptor 5                                      |
| IL18R1    | -0.74465 | 1.69E-05 | 7.69E-05 | -4.30259 | Down | interleukin 18 receptor 1                                 |
| H2AC7     | -0.74437 | 0.000902 | 0.002597 | -3.31949 | Down | H2A clustered histone 7                                   |
| SNORA29   | -0.74408 | 0.000271 | 0.000892 | -3.64165 | Down | small nucleolar RNA, H/ACA box 29                         |
| IHH       | -0.74353 | 1.70E-05 | 7.73E-05 | -4.30134 | Down | Indian hedgehog signaling molecule                        |
| FOXO4     | -0.74326 | 5.85E-13 | 2.82E-11 | -7.20388 | Down | forkhead box O4                                           |
| APOBEC3A  | -0.74309 | 0.000422 | 0.001329 | -3.52596 | Down | apolipoprotein B mRNA editing enzyme catalytic subunit 3A |
| ANLN      | -0.74182 | 2.97E-08 | 2.86E-07 | -5.5434  | Down | anillin actin binding protein                             |
| SERPINF2  | -0.74097 | 1.36E-10 | 2.90E-09 | -6.42022 | Down | serpin family F member 2                                  |
| CNN2      | -0.7406  | 2.15E-09 | 3.03E-08 | -5.98642 | Down | calponin 2                                                |
| ATAD3C    | -0.7406  | 5.72E-10 | 9.80E-09 | -6.19805 | Down | ATPase family AAA domain containing 3C                    |
| C7        | -0.74021 | 6.00E-07 | 3.98E-06 | -4.99135 | Down | complement C7                                             |
| PTX4      | -0.74004 | 0.000402 | 0.001273 | -3.53852 | Down | pentraxin 4                                               |
| IL2RG     | -0.73974 | 4.53E-11 | 1.12E-09 | -6.5856  | Down | interleukin 2 receptor subunit gamma                      |
| PFN1P2    | -0.73956 | 0.000752 | 0.002213 | -3.36975 | Down | profilin 1 pseudogene 2                                   |
| SAP25     | -0.7384  | 1.15E-09 | 1.78E-08 | -6.08717 | Down | Sin3A associated protein 25                               |
| YBX3P1    | -0.73798 | 5.88E-07 | 3.91E-06 | -4.99513 | Down | Y-box binding protein 3 pseudogene 1                      |
| SCARNA12  | -0.73773 | 7.84E-12 | 2.55E-10 | -6.84136 | Down | small Cajal body-specific RNA 12                          |
| COX8C     | -0.73767 | 1.73E-06 | 1.01E-05 | -4.78306 | Down | cytochrome c oxidase subunit 8C                           |
| SNX31     | -0.73747 | 1.12E-05 | 5.36E-05 | -4.39198 | Down | sorting nexin 31                                          |



|               |          |          |          |          |      |                                                           |
|---------------|----------|----------|----------|----------|------|-----------------------------------------------------------|
| DLL4          | -0.73642 | 5.23E-10 | 9.06E-09 | -6.21219 | Down | delta like canonical Notch ligand 4                       |
| TES           | -0.73604 | 4.81E-09 | 6.01E-08 | -5.85352 | Down | testin LIM domain protein                                 |
| A4GALT        | -0.7357  | 3.85E-13 | 1.96E-11 | -7.26086 | Down | alpha 1,4-galactosyltransferase (P blood group)           |
| GAGE10        | -0.73511 | 0.000201 | 0.000683 | -3.7181  | Down | G antigen 10                                              |
| COL4A4        | -0.73496 | 9.66E-13 | 4.32E-11 | -7.13526 | Down | collagen type IV alpha 4 chain                            |
| APOC4         | -0.73494 | 2.10E-06 | 1.20E-05 | -4.74403 | Down | apolipoprotein C4                                         |
| TNFRSF12A     | -0.73494 | 1.84E-09 | 2.65E-08 | -6.01092 | Down | TNF receptor superfamily member 12A                       |
| TLR9          | -0.73488 | 1.85E-10 | 3.75E-09 | -6.3734  | Down | toll like receptor 9                                      |
| HOXB2         | -0.73477 | 0.000166 | 0.000576 | -3.76636 | Down | homeobox B2                                               |
| ZC3H12A       | -0.73424 | 2.27E-12 | 8.83E-11 | -7.01691 | Down | zinc finger CCCH-type containing 12A                      |
| ADAMTS2       | -0.73179 | 4.20E-14 | 3.09E-12 | -7.55475 | Down | ADAM metalloproteinase with thrombospondin type 1 motif 2 |
| TP63          | -0.73136 | 1.81E-06 | 1.05E-05 | -4.77338 | Down | tumor protein p63                                         |
| FBXL19-AS1    | -0.73036 | 9.08E-14 | 5.80E-12 | -7.45361 | Down | FBXL19 antisense RNA 1                                    |
| ALX4          | -0.73029 | 1.60E-05 | 7.34E-05 | -4.31412 | Down | ALX homeobox 4                                            |
| OLFML1        | -0.73009 | 2.65E-10 | 5.08E-09 | -6.31809 | Down | olfactomedin like 1                                       |
| ADGRD1        | -0.72973 | 6.42E-09 | 7.63E-08 | -5.80545 | Down | adhesion G protein-coupled receptor D1                    |
| DOK2          | -0.72963 | 1.77E-05 | 8.02E-05 | -4.29187 | Down | docking protein 2                                         |
| KRT15         | -0.72909 | 0.000889 | 0.002563 | -3.32343 | Down | keratin 15                                                |
| SNORD17       | -0.72896 | 7.32E-05 | 0.00028  | -3.96572 | Down | small nucleolar RNA, C/D box 17                           |
| GUSBP2        | -0.72854 | 0.00062  | 0.001865 | -3.42292 | Down | GUSB pseudogene 2                                         |
| CLMN          | -0.72849 | 1.75E-11 | 5.06E-10 | -6.72537 | Down | calmin                                                    |
| EPHA2         | -0.72775 | 1.22E-11 | 3.72E-10 | -6.77824 | Down | EPH receptor A2                                           |
| KIF1C-AS1     | -0.72742 | 8.57E-10 | 1.38E-08 | -6.13394 | Down | KIF1C antisense RNA 1                                     |
| GFRA3         | -0.72704 | 0.000129 | 0.00046  | -3.82927 | Down | GDNF family receptor alpha 3                              |
| CERNA2        | -0.72654 | 0.000912 | 0.002622 | -3.31623 | Down | competing endogenous lncRNA 2 for microRNA let-7b         |
| H2BC11        | -0.72645 | 0.000135 | 0.00048  | -3.81752 | Down | H2B clustered histone 11                                  |
| KIF1C         | -0.72556 | 5.68E-10 | 9.75E-09 | -6.19907 | Down | kinesin family member 1C                                  |
| ADORA2A-AS1   | -0.72547 | 1.53E-11 | 4.53E-10 | -6.74495 | Down | ADORA2A antisense RNA 1                                   |
| SLC1A7        | -0.7233  | 0.000198 | 0.000676 | -3.72108 | Down | solute carrier family 1 member 7                          |
| KRT19         | -0.72322 | 5.13E-08 | 4.58E-07 | -5.44682 | Down | keratin 19                                                |
| ELMO1-AS1     | -0.72198 | 4.46E-08 | 4.05E-07 | -5.4716  | Down | ELMO1 antisense RNA 1                                     |
| ITPRIP        | -0.7218  | 1.03E-14 | 9.74E-13 | -7.73549 | Down | inositol 1,4,5-trisphosphate receptor interacting protein |
| SNORD117      | -0.72147 | 0.016271 | 0.033087 | -2.40278 | Down | small nucleolar RNA, C/D box 117                          |
| MARVELD2      | -0.72144 | 4.02E-07 | 2.79E-06 | -5.06813 | Down | MARVEL domain containing 2                                |
| SEMA3F        | -0.72138 | 4.10E-08 | 3.78E-07 | -5.48666 | Down | semaphorin 3F                                             |
| GEM           | -0.72116 | 9.80E-09 | 1.10E-07 | -5.73424 | Down | GTP binding protein overexpressed in skeletal muscle      |
| C5AR1         | -0.72096 | 9.87E-07 | 6.21E-06 | -4.89413 | Down | complement C5a receptor 1                                 |
| TMC8          | -0.72075 | 1.45E-14 | 1.25E-12 | -7.69226 | Down | transmembrane channel like 8                              |
| CD163         | -0.72075 | 0.001616 | 0.00434  | -3.153   | Down | CD163 molecule                                            |
| FLT4          | -0.72062 | 2.10E-11 | 5.86E-10 | -6.69871 | Down | fms related receptor tyrosine kinase 4                    |
| STON1-GTF2A1L | -0.72018 | 3.44E-06 | 1.87E-05 | -4.6424  | Down | STON1-GTF2A1L readthrough                                 |
| PLA2G12B      | -0.72004 | 0.024139 | 0.046668 | -2.25491 | Down | phospholipase A2 group XIIB                               |

|             |          |          |          |          |      |                                                         |
|-------------|----------|----------|----------|----------|------|---------------------------------------------------------|
| SAMD4A      | -0.72002 | 1.25E-13 | 7.59E-12 | -7.41101 | Down | sterile alpha motif domain containing 4A                |
| CYSLTR2     | -0.71962 | 9.23E-05 | 0.000343 | -3.90998 | Down | cysteinyl leukotriene receptor 2                        |
| CCL15-CCL14 | -0.7196  | 0.000364 | 0.001165 | -3.56467 | Down | CCL15-CCL14 readthrough (NMD candidate)                 |
| PIK3R5      | -0.71896 | 6.08E-10 | 1.03E-08 | -6.18823 | Down | phosphoinositide-3-kinase regulatory subunit 5          |
| SELENOP     | -0.71781 | 3.71E-08 | 3.46E-07 | -5.50428 | Down | selenoprotein P                                         |
| NEK5        | -0.71776 | 3.48E-06 | 1.88E-05 | -4.64038 | Down | NIMA related kinase 5                                   |
| PMAIP1      | -0.71767 | 1.36E-06 | 8.24E-06 | -4.83016 | Down | phorbol-12-myristate-13-acetate-induced protein 1       |
| ST13P4      | -0.7176  | 0.010946 | 0.023383 | -2.54441 | Down | ST13, Hsp70 interacting protein pseudogene 4            |
| S100P       | -0.71743 | 3.95E-05 | 0.000162 | -4.11045 | Down | S100 calcium binding protein P                          |
| PGF         | -0.71684 | 8.08E-10 | 1.31E-08 | -6.14343 | Down | placental growth factor                                 |
| COL4A2-AS2  | -0.71666 | 0.000699 | 0.002073 | -3.3898  | Down | COL4A2 antisense 2                                      |
| HAL         | -0.71612 | 0.000171 | 0.000592 | -3.75909 | Down | histidine ammonia-lyase                                 |
| CACNG5      | -0.71594 | 0.000107 | 0.000393 | -3.87319 | Down | calcium voltage-gated channel auxiliary subunit gamma 5 |
| KIF5A       | -0.7159  | 6.79E-07 | 4.45E-06 | -4.9673  | Down | kinesin family member 5A                                |
| TRNC        | -0.71548 | 8.58E-05 | 0.000322 | -3.92758 | Down | tRNA                                                    |
| RBPMS       | -0.71508 | 4.90E-15 | 5.29E-13 | -7.82948 | Down | RNA binding protein, mRNA processing factor             |
| ARRDC2      | -0.71507 | 5.87E-13 | 2.82E-11 | -7.20357 | Down | arrestin domain containing 2                            |
| PCAT19      | -0.71482 | 2.01E-07 | 1.51E-06 | -5.19797 | Down | prostate cancer associated transcript 19                |
| DIO3        | -0.71478 | 8.43E-10 | 1.36E-08 | -6.13659 | Down | iodothyroninedeiodinase 3                               |
| HSPA1B      | -0.71442 | 0.000745 | 0.002194 | -3.37244 | Down | heat shock protein family A (Hsp70) member 1B           |
| TOR4A       | -0.71359 | 2.00E-11 | 5.64E-10 | -6.70575 | Down | torsin family 4 member A                                |
| PTH1R       | -0.71357 | 6.77E-11 | 1.59E-09 | -6.52571 | Down | parathyroid hormone 1 receptor                          |
| ERI3-IT1    | -0.71251 | 9.16E-20 | 6.78E-17 | -9.09844 | Down | ERI3 intronic transcript 1                              |
| RBPMS2      | -0.71222 | 2.34E-17 | 6.36E-15 | -8.47534 | Down | RNA binding protein, mRNA processing factor 2           |
| PDE9A-AS1   | -0.71188 | 9.37E-06 | 4.55E-05 | -4.43119 | Down | PDE9A antisense RNA 1                                   |
| CEL         | -0.71029 | 6.45E-10 | 1.08E-08 | -6.17912 | Down | carboxyl ester lipase                                   |
| SNORD23     | -0.70985 | 8.36E-05 | 0.000315 | -3.93373 | Down | small nucleolar RNA, C/D box 23                         |
| TRNK        | -0.70982 | 2.59E-06 | 1.45E-05 | -4.7006  | Down | tRNA                                                    |
| RNF152      | -0.70953 | 1.26E-15 | 1.71E-13 | -7.99826 | Down | ring finger protein 152                                 |
| SLC38A2     | -0.70903 | 1.47E-10 | 3.09E-09 | -6.40886 | Down | solute carrier family 38 member 2                       |
| IP6K3       | -0.70897 | 8.05E-07 | 5.17E-06 | -4.93426 | Down | inositol hexakisphosphate kinase 3                      |
| JADE3       | -0.70818 | 5.85E-14 | 4.09E-12 | -7.51142 | Down | jade family PHD finger 3                                |
| COL6A2      | -0.70817 | 1.37E-13 | 8.20E-12 | -7.39907 | Down | collagen type VI alpha 2 chain                          |
| CD180       | -0.70801 | 1.99E-06 | 1.14E-05 | -4.75486 | Down | CD180 molecule                                          |
| FZD9        | -0.70692 | 1.92E-13 | 1.10E-11 | -7.35447 | Down | frizzled class receptor 9                               |
| UICLM       | -0.7065  | 0.000525 | 0.001614 | -3.46772 | Down | up-regulated in colorectal cancer liver metastasis      |
| AJUBA       | -0.70641 | 6.94E-11 | 1.62E-09 | -6.52193 | Down | ajuba LIM protein                                       |
| LEF1        | -0.70621 | 3.62E-11 | 9.29E-10 | -6.61891 | Down | lymphoid enhancer binding factor 1                      |
| MYH11       | -0.70454 | 4.22E-08 | 3.87E-07 | -5.48136 | Down | myosin heavy chain 11                                   |
| TBX2        | -0.70408 | 2.25E-12 | 8.80E-11 | -7.01787 | Down | T-box transcription factor 2                            |
| CARD6       | -0.70348 | 6.85E-11 | 1.60E-09 | -6.5239  | Down | caspase recruitment domain family member 6              |
| FMO2        | -0.70308 | 3.30E-08 | 3.12E-07 | -5.52493 | Down | flavin containing dimethylanilinemonooxygenase 2        |
| SLC37A2     | -0.70204 | 1.76E-12 | 7.12E-11 | -7.05248 | Down | solute carrier family 37 member 2                       |

|        |          |          |          |          |      |                                    |
|--------|----------|----------|----------|----------|------|------------------------------------|
| H2BC9  | -0.70203 | 0.006488 | 0.014763 | -2.72204 | Down | H2B clustered histone 9            |
| LATS2  | -0.70054 | 6.37E-13 | 3.03E-11 | -7.19235 | Down | large tumor suppressor kinase 2    |
| TRIM63 | -0.70027 | 0.004002 | 0.009655 | -2.878   | Down | tripartite motif containing 63     |
| MYL9   | -0.69999 | 4.27E-09 | 5.46E-08 | -5.87322 | Down | myosin light chain 9               |
| TNS1   | -0.69928 | 1.28E-17 | 3.75E-15 | -8.54591 | Down | tensin 1                           |
| FPR2   | -0.69884 | 0.004147 | 0.009962 | -2.86678 | Down | formyl peptide receptor 2          |
| CBX2   | -0.69857 | 1.06E-14 | 9.96E-13 | -7.73175 | Down | chromobox 2                        |
| PCK1   | -0.69648 | 0.000372 | 0.001187 | -3.55916 | Down | phosphoenolpyruvatecarboxykinase 1 |

**Table 3** The enriched GO terms of the up and down regulated differentially expressed genes

| GO ID                     | CATEGORY | GO Name                          | Adj.P.Val | Negative_log<br>10_of_adjeste<br>d_p_value | Gene<br>Count | Gene                                                                                                                                                                                                                                                                                                                                                                                                                                                                                                                                                                                                                                                                                                                                                                       |
|---------------------------|----------|----------------------------------|-----------|--------------------------------------------|---------------|----------------------------------------------------------------------------------------------------------------------------------------------------------------------------------------------------------------------------------------------------------------------------------------------------------------------------------------------------------------------------------------------------------------------------------------------------------------------------------------------------------------------------------------------------------------------------------------------------------------------------------------------------------------------------------------------------------------------------------------------------------------------------|
| <b>Up regulated genes</b> |          |                                  |           |                                            |               |                                                                                                                                                                                                                                                                                                                                                                                                                                                                                                                                                                                                                                                                                                                                                                            |
| GO:0065008                | BP       | regulation of biological quality | 1.51E-08  | 7.821012262                                | 142           | CRH,TAC1,NMU,VGF,PCS K1,ADCYAP1,GABRA6,SLN,C1QL3,NPAS4,GJD2,NPSR1,RGS4,SLC32A1,IL1RAPL2,GAD2,CAPZA3,CHRNA9,CRYM,GAD1,CXCL11,GABRA1,EGR1,PCDH8,PLSCR5,CALB1,BDNF,GABRG2,ROBO2,FLT3,CHRN B4,SLC5A7,KCNK18,HTR2C,TERT,NEFL,SNAP25,RAB3B,CYP4A11,RPH3A,GABRB2,RFX6,TACR1,CARTPT,ALOX12B,MCHR1,NRN1,SLC17A6,SLC4A10,AFP,HRG,SYT1,EPHA5,HTR3B,GLRA3,SYT4,CALCB,GRIN2B,HCN1,FATE1,GABRA4,AKAP5,ADRA1D,KCNC2,PTPN3,DHRS7C,GCNT4,KCNH5,AVP,DGKB,VSNL1,NAPB,HTR2A,CLTRN,PAK1,PAK3,SLC30A3,NCALD,ANO3,GLRA2,STXBP5L,NELL2,F7,ATP12A,SCN2A,HCRTR2,ADRB3,GPR88,NR1H4,SYP,SYT2,CALY,SLC12A1,CHRNB3,LRTM2,SYT10,PRKCE,GRIN2A,VSIG1,RHEX,CDH8,HTR1A,SNX10,SYN2,XK,GABRD,TRPC7,NRG1,PTH2R,NETO1,FGF12,SH3GL2,MLLT11,KISS1,UPK3A,CADPS,CHRNA6,NRXN3,F2RL2,FRMPD4,GPRASP2,SERPINB2,CLSTN3,VST |

|            |    |                                  |             |             |     |                                                                                                                                                                                                                                                                                                                                                                                                                                                                                                                                                                                                                                                                                                                                                                                                                                                                                                                                                                                                                                                                                                                                                                                                                                                                                                                                                                                                                                                                    |
|------------|----|----------------------------------|-------------|-------------|-----|--------------------------------------------------------------------------------------------------------------------------------------------------------------------------------------------------------------------------------------------------------------------------------------------------------------------------------------------------------------------------------------------------------------------------------------------------------------------------------------------------------------------------------------------------------------------------------------------------------------------------------------------------------------------------------------------------------------------------------------------------------------------------------------------------------------------------------------------------------------------------------------------------------------------------------------------------------------------------------------------------------------------------------------------------------------------------------------------------------------------------------------------------------------------------------------------------------------------------------------------------------------------------------------------------------------------------------------------------------------------------------------------------------------------------------------------------------------------|
| GO:0032501 | BP | multicellular organismal process | 1.37284E-06 | 5.862378621 | 220 | M5,P2RX2,GABRG3,CNG B1,SDR16C5,ATP8A2,RAB3A,ADTRP,LDB2,DSG1,RHO,MYB,IGF1,PLK2,TAC3,FSTL4,LRFN5,SCN8A,T<br>RHDE<br>CRH,SPRR2G,TAC1,NMU,MAS1,VGF,SST,ADCYAP1,PENK,GABRA6,SLN,DSG3,PPEF1,NPAS4,OR52N2,SI,GJD2,KRT5,NEUROD6,RGS4,KRT82,SLC32A1,IL1RAPL2,CAPZA3,CHRNA9,C14ORF39,EGR3,CRYM,PNOG,DRGX,GABRA1,EGR1,PCDH8,PVALB,OLFM3,ATOH7,CALB1,AMELX,WNT8A,CBLN4,MYOG,BDNF,ANKRD33,GABRG2,ROBO2,FLT3,CHRNA4,SLC5A7,HTR2C,CDH7,TCP11,PCP4,TERT,NEFL,MLIP,SOX11,SNAP25,TCF23,NYAP2,OR1N1,MYPN,CYP4A11,GDA,GREM2,UNC5D,CNTN5,GABRB2,MAL2,NLRP2,AGBL4,PTPRR,RFX6,CDH18,TACR1,CARTPT,ALOX12B,AMY2A,NRN1,SLC17A6,SLC4A10,AFP,HRG,SYT1,EPHA5,OR2AE1,CDH9,CYP24A1,HTR3B,GLRA3,SCG2,HPRT1,MEPE,SYT4,ENC1,NELL1,GFRA4,GRIN2B,HCN1,KCNB2,OTOL1,DLGAP1,GABRA4,ADRA1D,KCNC2,PTPN3,GCNT4,TDRD5,IL12RB2,AVP,DGKB,FGF9,PAX5,HTR2A,NAP1L2,C6ORF141,DLX1,PAK1,TESPA1,DLX6,PAK3,NCALD,GLRA2,GUCY1C,BHLHA9,TAF1A1,F7,RBFOX1,RTKN2,SCN2A,HCRT2,ADRB3,FSTL5,GPR88,CDH12,NR1H4,RSPO2,SYT2,STMN2,FGF5,PRPH2,GPR149,CHRNA3,LRTM2,RXFP1,SYT10,TAF1A2,PRKCE,DCLK1,PAX7,GRIN2A,VSIG1,RHEX,COL25A1,CAMK4,TUBB2A,CDH8,VWC2L,HUNK,HTR1A,SP9,SNX10,UPK2,TRIM72,BEX1,XK,WNT1,NEFH,GABRD,TRPC7,NRG1,PTH2R,NETO1,FGF12,PLPPR4,LPX1,MACROD2,SERPINB13,PLCB1,SH3GL2,SFTPA2,UPK3A,CHRNA6,OR13C5,NRXN3,INA,F2RL2,VSX2,SIPK9,INSM2,SERPINB2,CLSTN3,VSTM5,P2RX2,SPRY3,GABRG3,CNGB1,MYH13,ATP8A2,RAB3A,IL1RL2,ADTRP,LDB2,EID2B,PIWIL1,DSG1,RHO,RTN1,MYB,CLPSL2,PYY,B4GALT6,PLK4,IGF1,PLK2,TAC3,FSTL4,LRFN5,SCN8A,T |
|------------|----|----------------------------------|-------------|-------------|-----|--------------------------------------------------------------------------------------------------------------------------------------------------------------------------------------------------------------------------------------------------------------------------------------------------------------------------------------------------------------------------------------------------------------------------------------------------------------------------------------------------------------------------------------------------------------------------------------------------------------------------------------------------------------------------------------------------------------------------------------------------------------------------------------------------------------------------------------------------------------------------------------------------------------------------------------------------------------------------------------------------------------------------------------------------------------------------------------------------------------------------------------------------------------------------------------------------------------------------------------------------------------------------------------------------------------------------------------------------------------------------------------------------------------------------------------------------------------------|

|            |    |                |          |             |     |                                                                                                                                                                                                                                                                                                                                                                                                                                                                                                                                                                                                                                                                                                                                                                                                                                                                                                                                                                                                                                                                                                                                                                                                                                                                                                                                              |
|------------|----|----------------|----------|-------------|-----|----------------------------------------------------------------------------------------------------------------------------------------------------------------------------------------------------------------------------------------------------------------------------------------------------------------------------------------------------------------------------------------------------------------------------------------------------------------------------------------------------------------------------------------------------------------------------------------------------------------------------------------------------------------------------------------------------------------------------------------------------------------------------------------------------------------------------------------------------------------------------------------------------------------------------------------------------------------------------------------------------------------------------------------------------------------------------------------------------------------------------------------------------------------------------------------------------------------------------------------------------------------------------------------------------------------------------------------------|
| GO:0030054 | CC | cell junction  | 9.36E-19 | 18.02890974 | 110 | <p>RHDE,GAP43<br/>           CRH,TAC1,NMU,SST,AD<br/>           CYAP1,PENK,GABRA6,D<br/>           SG3,NPAS4,GJD2,SLC32A<br/>           1,IL1RAPL2,GAD2,CHRN<br/>           A9,EGR3,PNOC,GAD1,GA<br/>           BRA1,PCDH8,OLFM3,CA<br/>           LB1,CBLN4,BDNF,GABR<br/>           G2,CHRN4,SVOP,SLC5A<br/>           7,HTR2C,CDH7,NEFL,SN<br/>           AP25,RAB3B,RAB27B,RP<br/>           H3A,CNTN5,GABRB2,PTP<br/>           RR,CDH18,FBLN7,CARTP<br/>           T,NRN1,SLC17A6,RAB3C,<br/>           SLC4A10,SYT1,EPHA5,CD<br/>           H9,HTR3B,GLRA3,SYT4,<br/>           NMNAT2,GRIN2B,LAMP5<br/>           ,DLGAP1,GABRA4,AKAP<br/>           5,CAP2,KCNC2,DGKB,NA<br/>           PB,HTR2A,PAK1,PAK3,SL<br/>           C30A3,GLRA2,STXBP5L,S<br/>           CN2A,HCRTR2,NPBWR1,<br/>           SV2B,SYT13,CDH12,SYP,<br/>           SYT2,CALY,NSF,CHRN3<br/>           ,SYT10,DCLK1,GRIN2A,C<br/>           AMK4,CDH8,VWC2L,HTR<br/>           1A,SYN2,NEFH,GABRD,N<br/>           RG1,NETO1,FGF12,PLPPR<br/>           4,PLCB1,SH3GL2,CADPS,<br/>           CHRNA6,NRXN3,INA,FR<br/>           MPD4,CLSTN3,P2RX2,GA<br/>           BRG3,CNGB1,RAB3A,DS<br/>           G1,RHO,CHRM4,SYNGR4,<br/>           LRFN5,SCN8A,GAP43</p>                                                                                              |
| GO:0071944 | CC | cell periphery | 9.72E-11 | 10.01230888 | 184 | <p>SPRR2G,TAC1,MAS1,PEN<br/>           K,GABRA6,DSG3,OR52N2<br/>           ,MUC15,SI,GJD2,GSG1L2,<br/>           NPSR1,KRT5,ABRA,RGS4<br/>           ,SLC32A1,IL1RAPL2,GAD<br/>           2,CAPZA3,CHRNA9,PNOC<br/>           ,GAD1,GABRA1,PCDH8,P<br/>           VALB,PLSCR5,OLFM3,PR<br/>           MT8,KCNV1,CALB1,MS4<br/>           A8,GABRG2,CD70,ROBO2<br/>           ,FLT3,CHRN4,SLC5A7,PI<br/>           K3C2G,KCNK18,STYK1,H<br/>           TR2C,ARL4D,CDH7,TERT<br/>           ,MLIP,SNAP25,RAB3B,RA<br/>           B27B,OR1N1,MUCL1,RXF<br/>           P3,MYPN,CYP4A11,UNC5<br/>           D,RPH3A,CNTN5,GABRB<br/>           2,MAL2,PTPRR,CDH18,T<br/>           ACR1,KCNG3,MCHR1,NR<br/>           N1,KCNS2,RAB3C,SLC4A<br/>           10,HRG,GPR22,SYT1,EPH<br/>           A5,OR2AE1,PARM1,GLP2<br/>           R,CDH9,CYP24A1,HTR3B,<br/>           GLRA3,SYT4,GPR158,GF<br/>           RA4,GRIN2B,LAMP5,HCN<br/>           1,RHOV,KCNB2,ENTPD3,<br/>           DLGAP1,GABRA4,AKAP5<br/>           ,ADRA1D,CAP2,KCNC2,P<br/>           TPN3,RGS7,KCNH5,IL12R<br/>           B2,DGKB,HTR2A,CLTRN,<br/>           PAK1,PAK3,SLC30A3,AN<br/>           O3,GLRA2,SLC39A2,STX<br/>           BP5L,F7,RTKN2,ATP12A,<br/>           SCN2A,MCHR2,HCRTR2,<br/>           ADRB3,GPR88,NPBWR1,S<br/>           V2B,SYT13,CDH12,SYP,S</p> |

|                             |    |                                                 |             |             |     |                                                                                                                                                                                                                                                                                                                                                                                                                                                                                                                                                                                                                                                                                                                     |
|-----------------------------|----|-------------------------------------------------|-------------|-------------|-----|---------------------------------------------------------------------------------------------------------------------------------------------------------------------------------------------------------------------------------------------------------------------------------------------------------------------------------------------------------------------------------------------------------------------------------------------------------------------------------------------------------------------------------------------------------------------------------------------------------------------------------------------------------------------------------------------------------------------|
|                             |    |                                                 |             |             |     | YT2,CALY,SLC12A1,PRP<br>H2,NSF,GPR149,CHRN3,<br>RXFP1,SYT10,PRKCE,DC<br>LK1,GRIN2A,VSIG1,KCN<br>Q5,RHEX,COL25A1,CDH8<br>,VWC2L,HTR1A,SYN2,UP<br>K2,LRRC38,TRIM72,IPCE<br>F1,SIDT1,XK,WNT1,GAB<br>RD,TRPC7,NRG1,PTH2R,<br>NETO1,PLPPR4,SH3GL2,U<br>PK3A,CHRNA6,OR13C5,N<br>RXN3,GSG1,F2RL2,SERPI<br>NB2,CLSTN3,VSTM5,P2R<br>X2,GABRG3,CNGB1,SDR1<br>6C5,ATP8A2,RAB3A,DIR<br>AS2,IL1RL2,ADTRP,LDB2<br>,SLC7A4,DSG1,RHO,CHR<br>M4,PLK4,IGF1,LRFN5,SC<br>N8A,TRHDE,GAP43,PAQR<br>9                                                                                                                                                                                                                                      |
| GO:0015267                  | MF | channel activity                                | 3.82E-07    | 6.418007209 | 34  | GABRA6,GJD2,CHRNA9,<br>GABRA1,KCNV1,GABRG<br>2,CHRN4,KCNK18,SNAP<br>25,GABRB2,KCNG3,KCNS<br>2,HTR3B,GLRA3,GRIN2B,<br>HCN1,KCNB2,GABRA4,K<br>CNC2,KCNH5,ANO3,GLR<br>A2,SCN2A,CHRN3,GRIN<br>2A,KCNQ5,LRRC38,GABR<br>D,TRPC7,CHRNA6,P2RX2,<br>GABRG3,CNGB1,SCN8A<br>MAS1,GABRA6,OR52N2,<br>NPSR1,IL1RAPL2,CHRNA<br>9,GABRA1,GABRG2,ROB<br>O2,FLT3,CHRN4,HTR2C,<br>ADGRF2,SOSTDC1,OR1N<br>1,RXFP3,UNC5D,GABRB2<br>,PTPRR,TACR1,MCHR1,G<br>PR22,EPA5,OR2AE1,GLP<br>2R,HTR3B,GLRA3,GPR15<br>8,GFRA4,GRIN2B,GABRA<br>4,ADRA1D,IL12RB2,HTR2<br>A,GLRA2,MCHR2,HCRTR<br>2,ADRB3,GPR88,NPBWR1<br>,GPR149,CHRN3,RXFP1,<br>GRIN2A,HTR1A,GABRD,P<br>TH2R,CHRNA6,OR13C5,N<br>RXN3,F2RL2,P2RX2,GAB<br>RG3,IL1RL2,CHML,RHO,<br>CHRM4 |
| GO:0004888                  | MF | transmembranesig<br>naling receptor<br>activity | 9.96545E-06 | 5.001503151 | 57  |                                                                                                                                                                                                                                                                                                                                                                                                                                                                                                                                                                                                                                                                                                                     |
| <b>Down regulated genes</b> |    |                                                 |             |             |     |                                                                                                                                                                                                                                                                                                                                                                                                                                                                                                                                                                                                                                                                                                                     |
| GO:0007154                  | BP | cell<br>communication                           | 4.63E-09    | 8.334588565 | 199 | MMP8,CRNN,PPBP,GABR<br>R2,CXCR6,CD40LG,TTR,<br>H3C6,FOXA3,NCR1,CXCR<br>1,CXCR2,OR7C1,SLC22A2<br>,SLAMF1,GPR174,GPR20,<br>PIGR,RAB42,OR2B11,CDC<br>42BPG,PF4,FCRL1,IL1R2,<br>P2RY10,CXCR4,LBX2,S10<br>0A4,NKX6-<br>1,MS4A1,CASP12,CCR2,O<br>R7A5,OTX2,TREML4,SIT1<br>,IL7R,MIA,MRGPRF,MYO<br>CD,S100A12,CCL26,CLDN<br>18,ITGA10,INSRR,CXCR3,<br>UBD,PROK2,F2RL3,FOXD<br>1,GATA3,CXCL8,FOXC2,P<br>YHIN1,COL1A2,GIPR,CD2<br>,LCK,TNFRSF10D,ALOX1<br>5B,RGS1,SIK1,UBASH3A,                                                                                                                                                                                                                                              |



|            |    |                      |          |             |     |                                                                                                                                                                                                                                                                                                                                                                                                                                                                                                                                                                                                                                                                                                                                                                                                                                                                                                                                                                                                                                                                                                                                                                                                                                                                                                                                                                                                                                                                                                                                                                                                                                                                                                                                          |
|------------|----|----------------------|----------|-------------|-----|------------------------------------------------------------------------------------------------------------------------------------------------------------------------------------------------------------------------------------------------------------------------------------------------------------------------------------------------------------------------------------------------------------------------------------------------------------------------------------------------------------------------------------------------------------------------------------------------------------------------------------------------------------------------------------------------------------------------------------------------------------------------------------------------------------------------------------------------------------------------------------------------------------------------------------------------------------------------------------------------------------------------------------------------------------------------------------------------------------------------------------------------------------------------------------------------------------------------------------------------------------------------------------------------------------------------------------------------------------------------------------------------------------------------------------------------------------------------------------------------------------------------------------------------------------------------------------------------------------------------------------------------------------------------------------------------------------------------------------------|
| GO:0050896 | BP | response to stimulus | 5.62E-09 | 8.250628776 | 249 | GHRHR,FFAR2,IL24,HCA<br>R3,OR2B6,GPR15,GJA4,C<br>LEC4D,REM1,WNT6,SH2<br>D3A,HSPB1,HRH4,HSPA1<br>A,CD177,PEAR1,TBX3,AB<br>CC2,OR2A7,LILRA4,NOT<br>CH3,ITGA11,TEAD2,TGF<br>B1I1,P2RX7,HIC1,SCT,ZB<br>ED6,IL3RA,CD3E,NGFR,A<br>NPEP,KANK2,GDF15,CR1,<br>ANGPT2,TBX18,IL2RB,TR<br>IP10,PLN,TNFSF14,TBX6,<br>ONECUT1,CEACAM1,DK<br>KL1,ZNF683,CCL14,RRAD<br>,TLR8,GPRC5A,IL18RAP,P<br>2RY14,BLK,VNN1,SH2D6,<br>LILRB5,OR51E1,AOC1,GP<br>R4,ADORA2A,ITGA5,FOX<br>F1,ADGRG3,E2F2,COL1A<br>1,IQGAP2,PLEKHA4,ADM<br>2,ADRA2B,FCRLA,COL3A<br>1,IFNA2,RCVRN,CHRNA<br>1,FCRL3,GPER1,OR5K2,KL<br>RB1,IGF2,PRLR,BTN1A1,<br>S1PR4,INS-<br>IGF2,FCGR2B,MMP9,PRK<br>X,TNFRSF10A,SLC12A7,S<br>YDE1,TLR5,IL18R1,IHH,F<br>OXO4,SERPINF2,CNN2,IL<br>2RG,DLL4,TNFRSF12A,TL<br>R9,ZC3H12A,TP63,ADGR<br>D1,DOK2,EPHA2,GFRA3,<br>H2BC11,KRT19,ITPRIP,SE<br>MA3F,GEM,C5AR1,TMC8,<br>FLT4,CYSLTR2,CCL15-<br>CCL14,PIK3R5,PMAIP1,P<br>GF,CACNG5,KIF5A,RBPM<br>S,PTH1R,RBPMS2,CEL,R<br>NF152,SLC38A2,CD180,FZ<br>D9,AJUBA,LEF1,TBX2,LA<br>TS2,TRIM63,TNS1,FPR2,P<br>CK1<br>MMP8,H4C4,MMP7,CRNN<br>,PPBP,GABRR2,CXCR6,C<br>D40LG,TTR,H3C6,FOXA3,<br>NCR1,CXCR1,CXCR2,OR7<br>C1,NPC1L1,SLC22A2,SLA<br>MF1,IRX5,HSPA6,GPR174,<br>GPR20,PIGR,SERPINA5,R<br>AB42,OR2B11,CDC42BPG,<br>PF4,FCRL1,IL1R2,P2RY10,<br>CXCR4,LBX2,S100A4,NK<br>X6-<br>1,MS4A1,CASP12,OBP2B,<br>MCEMP1,CCR2,OR7A5,O<br>TX2,NLRP4,TREML4,SIT1<br>,IL7R,MIA,CR1L,MRGPRF<br>,KCNE1,MYOCD,S100A12<br>,CCL26,CLDN18,HP,ORM<br>1,ITGA10,INSRR,CXCR3,<br>UBD,SLC22A8,PROK2,F2<br>RL3,FOXD1,GATA3,CXCL<br>8,FOXC2,PYHIN1,COL1A2<br>,GIPR,CD2,LCK,TNFRSF1<br>0D,ALOX15B,RGS1,FMO1<br>,SIK1,UHRF1,UBASH3A,H<br>SPB7,GHRHR,FFAR2,SER<br>PINH1,IL24,HCAR3,OR2B<br>6,GPR15,GJA4,MMRN1,C<br>LEC4D,REM1,CST7,WNT6 |
|------------|----|----------------------|----------|-------------|-----|------------------------------------------------------------------------------------------------------------------------------------------------------------------------------------------------------------------------------------------------------------------------------------------------------------------------------------------------------------------------------------------------------------------------------------------------------------------------------------------------------------------------------------------------------------------------------------------------------------------------------------------------------------------------------------------------------------------------------------------------------------------------------------------------------------------------------------------------------------------------------------------------------------------------------------------------------------------------------------------------------------------------------------------------------------------------------------------------------------------------------------------------------------------------------------------------------------------------------------------------------------------------------------------------------------------------------------------------------------------------------------------------------------------------------------------------------------------------------------------------------------------------------------------------------------------------------------------------------------------------------------------------------------------------------------------------------------------------------------------|

|            |    |                 |          |             |     |                                                                                                                                                                                                                                                                                                                                                                                                                                                                                                                                                                                                                                                                                                                                                                                                                                                                                                                                                                                                                                                                                                                                                                                                                                                                                                                                                                                                                                                                                  |
|------------|----|-----------------|----------|-------------|-----|----------------------------------------------------------------------------------------------------------------------------------------------------------------------------------------------------------------------------------------------------------------------------------------------------------------------------------------------------------------------------------------------------------------------------------------------------------------------------------------------------------------------------------------------------------------------------------------------------------------------------------------------------------------------------------------------------------------------------------------------------------------------------------------------------------------------------------------------------------------------------------------------------------------------------------------------------------------------------------------------------------------------------------------------------------------------------------------------------------------------------------------------------------------------------------------------------------------------------------------------------------------------------------------------------------------------------------------------------------------------------------------------------------------------------------------------------------------------------------|
| GO:0005886 | CC | plasma membrane | 5.05E-08 | 7.296828963 | 166 | ,SH2D3A,FMO3,HSPB1,HRH4,HSPA1A,CD177,PEAR1,TBX3,TCN1,MAFF,LY9,ABCC2,OR2A7,LILRA4,FOXJ1,NOTCH3,ITGA11,TEAD2,C6,LYZ,TGFB11,P2RX7,HIC1,SCT,ABCC3,ZBED6,IL3RA,CD3E,NGFR,ANPEP,KANK2,RUNX3,GDF15,GZMM,CR1,ANGPT2,JAML,TBX18,IL2RB,MGAM,TRIP10,SLAMF6,PLN,LYG2,TNFSF14,TBX6,SIX1,ONECUT1,CEACAM1,DKKL1,ZNF683,CCL14,RRAD,TLR8,GPRC5A,IL18RAP,P2RY14,BLK,VNN1,SH2D6,LILRB5,OR51E1,AOC1,GPOR4,ADORA2A,AZGP1,ITGA5,FOXF1,ADGRG3,E2F2,COL1A1,IQGAP2,PLEKH A4,FOLR3,ADM2,BCL6B,H4C5,NFE2,ADRA2B,FCRLA,COL3A1,IFNA2,RCVRN,ND6,CHRNA3,FCRL3,GPOR1,OR5K2,KLRB1,IGF2,PRLR,BTN1A1,S1PR4,INSIGF2,FCGR2B,DNAJB1,MP9,FANCC,PRKX,TNFRSF10A,SYDE1,TGFB1,TLR5,IL18R1,IHH,FOXO4,APOBEC3A,SERPINF2,CNN2,C7,IL2RG,DLL4,TNFRSF12A,TLR9,ZC3H12A,TP63,ADGRD1,DOK2,EPHA2,GFRA3,H2BC11,KRT19,ITPR1P,SEMA3F,GEM,C5AR1,TCMC8,CD163,FLT4,CYSLTR2,CCL15-CCL14,PIK3R5,SELENOP,PMAIP1,S100P,PGF,CACNG5,KIF5A,RBPMS,PTH1R,RBPMS2,RNF152,SLC38A2,COL6A2,CD180,FZD9,AJUBA,LEF1,TBX2,FMO2,LATS2,TRIM63,MYL9,TNS1,FPR2,PCK1GABRR2,CXCR6,CD40LG,NCR1,CXCR1,CXCR2,OR7C1,NPC1L1,SLC22A2,SLAMF1,HSPA6,GPR174,GPR20,SRPX2,PIGR,SERPINA5,RAB42,OR2B11,FCRL1,IL1R2,P2RY10,CXCR4,GFI1B,MS4A1,VNN3,MCEMP1,CCR2,OR7A5,TREML4,KCNJ15,SIT1,KCNE4,IL7R,MRGPRF,KCNE1,S100A12,CALDN18,ITGA10,SLC16A12,INSRR,CXCR3,SLC6A12,SLC22A8,F2RL3,GIPR,CD2,LCK,TNFRSF10D,ALOX15B,RGS1,ABCA6,GHRHR,FFAR2,HCAR3,OR2B6,GPOR15,GJA4,CLEC4D,REM1,WNT6,HSPB1,HRH4,HSPA1A,CD177,PEAR1,LY9,SLCO4A1,ABCC2,OR2A7,LILRA4,NOTCH3,ITGA11,SLC13A4,PCDH18,C6,TGFB |
|------------|----|-----------------|----------|-------------|-----|----------------------------------------------------------------------------------------------------------------------------------------------------------------------------------------------------------------------------------------------------------------------------------------------------------------------------------------------------------------------------------------------------------------------------------------------------------------------------------------------------------------------------------------------------------------------------------------------------------------------------------------------------------------------------------------------------------------------------------------------------------------------------------------------------------------------------------------------------------------------------------------------------------------------------------------------------------------------------------------------------------------------------------------------------------------------------------------------------------------------------------------------------------------------------------------------------------------------------------------------------------------------------------------------------------------------------------------------------------------------------------------------------------------------------------------------------------------------------------|

|            |    |                      |          |             |     |                                                                                                                                                                                                                                                                                                                                                                                                                                                                                                                                                                                                                                                                                                                                                                                                                                                                                                                                                                                                                                                                                                                                                                                                                                                                                                                                                                                                                                                                                                                                |
|------------|----|----------------------|----------|-------------|-----|--------------------------------------------------------------------------------------------------------------------------------------------------------------------------------------------------------------------------------------------------------------------------------------------------------------------------------------------------------------------------------------------------------------------------------------------------------------------------------------------------------------------------------------------------------------------------------------------------------------------------------------------------------------------------------------------------------------------------------------------------------------------------------------------------------------------------------------------------------------------------------------------------------------------------------------------------------------------------------------------------------------------------------------------------------------------------------------------------------------------------------------------------------------------------------------------------------------------------------------------------------------------------------------------------------------------------------------------------------------------------------------------------------------------------------------------------------------------------------------------------------------------------------|
| GO:0005576 | CC | extracellular region | 7.33E-07 | 6.134830394 | 139 | <p>                     II1,P2RX7,CLDN15,ABCC3,IL3RA,CD3E,NGFR,MLANA,ANPEP,CR1,ANGPT2,JAML,IL2RB,MGAM,TRIP10,SLAMF6,TNFSF14,CEACAM1,RRAD,TLR8,GP5A,IL18RAP,P2RY14,BLK,ADH1B,VNN1,OR51E1,AOC1,GPR4,ADORA2A,FCN3,SCN3,AZGP1,ITGA5,ADGRG3,SLC4A11,IQGAP2,PLEKHA4,FOLR3,ADRA2B,FCRLA,CHRNA3,FCRL3,GP6R1,LGSN,OR5K2,KLRB1,PRLR,BTN1A1,S1PR4,FCGR2B,VNN2,TNFRSF10A,SLC12A7,TGFB1,TLR5,IL18R1,IHH,C7,IL2RG,DLL4,TES,TNFRSF12A,TLR9,ADGRD1,EPHA2,GFRA3,H2BC11,SLC1A7,KRT19,ITPR1,MAP3K13,SEMA3F,GEM,CSAR1,TMC8,CD163,FLT4,CYSLTR2,PIK3R5,S100P,CACNG5,ARRDC2,DIO3,PTH1R,CEL,SLC38A2,COX6A2,CD180,FZD9,AJUBA,FPR2                 </p> <p>                     MMP8,H4C4,MMP7,CRNN,PPBP,MMP10,CD40LG,TTN,SLC6A6,SLC22A2,SLAMF1,GZMK,HSPA6,SRPX2,PIGR,SERPINA5,PF4,IL1R2,CXCR4,MFAP2,S100A4,NKX6-1,MS4A1,VNN3,OBP2B,TREM4,SIT1,IL7R,MIA,CR1L,S100A12,CCL26,HP,ORM1,SLC22A8,PROK2,F2RL3,CLEC18A,NXPE4,CXCL8,CKM,COL1A2,CD2,LCK,ALOX15B,H2AC12,LCN10,UBASH3A,SERPINH1,IL24,MMRN1,CST7,COL8A1,WNT6,HSPB1,ECM2,HSPA1A,CD177,TCN1,OIT3,NOTCH3,C6,LYZ,TGFB11,SCT,LCN6,NGFR,ANPEP,GDF15,GZMM,CR1,ANGPT2,MGAM,TRIP10,SLAMF6,LYG2,TNFSF14,CEACAM1,PRELP,DKKL1,CCL14,AEBP1,GPRC5A,VNN1,AOC1,AZGP1,COL1A1,IQGA2,FOLR3,ADM2,H4C5,COL3A1,C11ORF52,IFNA2,CD8A2,CD27A1,ACAN,IGF2,PRLR,H2AC6,BTN1A1,TGM4,INS-IGF2,DNAJB1,CFHR3,MM9,VNN2,TGFB1,H2AC7,IHH,SERPINF2,CNN2,C7,PTX4,CD4A4,APOC4,TLR9,ADAMTS2,OLFML1,KRT15,H2BC11,KRT19,SEMA3F,TMC8,CD163,FLT4,PLA2G12B,CCL15-CCL14,SELENOP,S100P,PGF,TOR4A,CEL,CD6A2,CD180,MYH11,SLC37A2,                 </p> |
|------------|----|----------------------|----------|-------------|-----|--------------------------------------------------------------------------------------------------------------------------------------------------------------------------------------------------------------------------------------------------------------------------------------------------------------------------------------------------------------------------------------------------------------------------------------------------------------------------------------------------------------------------------------------------------------------------------------------------------------------------------------------------------------------------------------------------------------------------------------------------------------------------------------------------------------------------------------------------------------------------------------------------------------------------------------------------------------------------------------------------------------------------------------------------------------------------------------------------------------------------------------------------------------------------------------------------------------------------------------------------------------------------------------------------------------------------------------------------------------------------------------------------------------------------------------------------------------------------------------------------------------------------------|

|            |    |                                     |             |             |    |                                                                                                                                                                                                                                                                                                                                                                                                                                                                                                                                                                                                                      |
|------------|----|-------------------------------------|-------------|-------------|----|----------------------------------------------------------------------------------------------------------------------------------------------------------------------------------------------------------------------------------------------------------------------------------------------------------------------------------------------------------------------------------------------------------------------------------------------------------------------------------------------------------------------------------------------------------------------------------------------------------------------|
| GO:0038023 | MF | signaling receptor activity         | 2.01E-14    | 13.6969021  | 80 | H2BC9,PCK1<br>GABRR2,CXCR6,CXCR1,<br>CXCR2,OR7C1,SLAMF1,G<br>PR174,GPR20,PIGR,OR2B<br>11,FCRL1,IL1R2,P2RY10,<br>CXCR4,CCR2,OR7A5,TRE<br>ML4,IL7R,MRGPRF,INSR<br>R,CXCR3,F2RL3,GIPR,CD<br>2,TNFRSF10D,GHRHR,FF<br>AR2,HCAR3,OR2B6,GPR1<br>5,HRH4,PEAR1,OR2A7,LI<br>LRA4,NOTCH3,ITGA11,P2<br>RX7,IL3RA,CD3E,NGFR,A<br>NPEP,CR1,IL2RB,TLR8,G<br>PRC5A,IL18RAP,P2RY14,<br>LILRB5,OR51E1,GPR4,AD<br>ORA2A,ADGRG3,FOLR3,<br>ADRA2B,FCRLA,CHRNA<br>FCRL3,GPER1,OR5K2,KL<br>RB1,PRLR,BTN1A1,S1PR4<br>,FCGR2B,TNFRSF10A,TL<br>R5,IL18R1,IL2RG,TLR9,A<br>DGRD1,EPHA2,GFRA3,C5<br>AR1,FLT4,CYSLTR2,PTH1<br>R,CEL,FZD9,LEF1,FPR2 |
| GO:0004930 | MF | G protein-coupled receptor activity | 0.000859098 | 3.065957046 | 38 | CXCR6,CXCR1,CXCR2,O<br>R7C1,GPR174,GPR20,OR2<br>B11,P2RY10,CXCR4,CCR2<br>,OR7A5,MRGPRF,CXCR3,<br>F2RL3,GIPR,GHRHR,FFA<br>R2,HCAR3,OR2B6,GPR15,<br>HRH4,OR2A7,GPRC5A,P2<br>RY14,OR51E1,GPR4,ADO<br>RA2A,ADGRG3,ADRA2B,<br>GPER1,OR5K2,S1PR4,AD<br>GRD1,C5AR1,CYSLTR2,P<br>TH1R,FZD9,FPR2                                                                                                                                                                                                                                                                                                                              |

**Table 4** The enriched pathway terms of the up and down regulated differentially expressed genes

| Pathway ID                | Pathway Name                                                    | Adj.P.Val | Negative_log10_of_adjusted_p_value | Gene Count | Gene                                                                                                                                                                                                                                                                                                                                                |
|---------------------------|-----------------------------------------------------------------|-----------|------------------------------------|------------|-----------------------------------------------------------------------------------------------------------------------------------------------------------------------------------------------------------------------------------------------------------------------------------------------------------------------------------------------------|
| <b>Up regulated genes</b> |                                                                 |           |                                    |            |                                                                                                                                                                                                                                                                                                                                                     |
| REAC:R-HSA-112316         | Neuronal System                                                 | 9.33E-20  | 19.03029601                        | 47         | GABRA6,GJD2,SLC32A1,IL1R<br>APL2,GAD2,CHRNA9,GAD1,<br>GABRA1,KCNV1,GABRG2,C<br>HRNB4,SLC5A7,KCNK18,NEF<br>L,SNAP25,GABRB2,KCNG3,K<br>CNS2,SYT1,HTR3B,GLRA3,G<br>RIN2B,HCN1,KCNB2,DLGAP1<br>,GABRA4,AKAP5,KCNC2,KC<br>NH5,NCALD,GLRA2,SYT2,NS<br>F,CHRN3,SYT10,GRIN2A,K<br>CNQ5,CAMK4,TUBB2A,SYN2<br>,NRG1,PLCB1,CHRNA6,NRX<br>N3,GABRG3,RAB3A,PPM1E |
| REAC:R-HSA-112314         | Neurotransmitter receptors and postsynaptic signal transmission | 1.54E-09  | 8.812159549                        | 24         | GABRA6,CHRNA9,GABRA1,<br>GABRG2,CHRN4,NEFL,GAB<br>RB2,HTR3B,GLRA3,GRIN2B,<br>GABRA4,AKAP5,NCALD,GL<br>RA2,NSF,CHRN3,GRIN2A,C<br>AMK4,TUBB2A,NRG1,PLCB1,<br>CHRNA6,GABRG3,PPM1E                                                                                                                                                                      |
| REAC:R-HSA-373076         | Class A/1 (Rhodopsin-like receptors)                            | 1.41E-07  | 6.850438507                        | 28         | TAC1,NMU,SST,PENK,NPSR1<br>,PNOC,CXCL11,HTR2C,RXFP<br>3,TACR1,MCHR1,ADRA1D,A<br>VP,HTR2A,MCHR2,HCRTR2,<br>ADRB3,NPBWR1,RXFP1,HTR                                                                                                                                                                                                                    |

|                             |                               |             |             |    |                                                                                                                                                                                                                                                                                                                                                                                                                                                                                                              |
|-----------------------------|-------------------------------|-------------|-------------|----|--------------------------------------------------------------------------------------------------------------------------------------------------------------------------------------------------------------------------------------------------------------------------------------------------------------------------------------------------------------------------------------------------------------------------------------------------------------------------------------------------------------|
| REAC:R-HSA-416476           | G alpha (q) signalling events | 5.35933E-05 | 4.270889165 | 19 | 1A,XK,PLPPR4,KISS1,F2RL2,RHO,PYY,CHRM4,TAC3<br>TAC1,NMU,NPSR1,RGS4,HTR2C,TACR1,MCHR1,ADRA1D,AVP,DGKB,HTR2A,MCHR2,HCRTR2,PRKCE,TRPC7,PLCB1,KISS1,F2RL2,TAC3                                                                                                                                                                                                                                                                                                                                                   |
| REAC:R-HSA-372790           | Signaling by GPCR             | 0.000127112 | 3.895813541 | 51 | CRH,TAC1,NMU,SST,ADCYA P1,PENK,PPEF1,OR52N2,NPSR1,RGS4,PNOC,CXCL11,WNT8A,HTR2C,OR1N1,RXFP3,TACR1,MCHR1,OR2AE1,GLP2R,CALCB,ADRA1D,RGS7,AVP,DGKB,HTR2A,PAK1,GUCA1C,MCHR2,HCRTR2,ADRB3,NPBWR1,RXFP1,PRKCE,CAMK4,HTR1A,XK,WNT1,TRPC7,PTH2R,PLPPR4,PLCB1,KISS1,REEP1,OR13C5,F2RL2,CNGB1,RHO,PYY,CHRM4,TAC3                                                                                                                                                                                                        |
| REAC:R-HSA-162582           | Signal Transduction           | 0.533619768 | 0.272768091 | 78 | CRH,TAC1,NMU,VGF,SST,ADCYAP1,PENK,PPEF1,OR52N2,EGR4,NPSR1,RGS4,EGR3,PNOC,CXCL11,GABRA1,EGR1,WNT8A,BDNF,GABRG2,FLT3,HTR2C,TERT,NEFL,OR1N1,RXFP3,GREM2,GABRB2,TACR1,MCHR1,OR2AE1,GLP2R,CALCB,GFRA4,GRIN2B,RHOV,ADRA1D,PTPN3,RGS7,AVP,DGKB,FGF9,HTR2A,PAK1,PAK3,GUCA1C,MCHR2,HCRTR2,ADRB3,NPBWR1,RSPO2,RXFP1,PRKCE,CAMK4,TUBB2A,HTR1A,XK,WNT1,TRPC7,NRG1,PTH2R,PLPPR4,PLCB1,SH3GL2,KISS1,REEP1,OR13C5,F2RL2,GABRG3,CNGB1,DYNC111,SDR16C5,RHO,MYB,PYY,CHRM4,IGF1,TAC3                                            |
| <b>Down regulated genes</b> |                               |             |             |    |                                                                                                                                                                                                                                                                                                                                                                                                                                                                                                              |
| REAC:R-HSA-500792           | GPCR ligand binding           | 2.77211E-06 | 5.557190041 | 32 | PPBP,CXCR6,CXCR1,CXCR2,PF4,P2RY10,CXCR4,CCR2,CXCR3,PROK2,F2RL3,CXCL8,GIPR,GHRHR,FFAR2,HCAR3,WNT6,HRH4,SCT,P2RY14,GPR4,ADORA2A,ADM2,ADRA2B,GPER1,S1PR4,IHH,C5AR1,CYSLTR2,PTH1R,FZD9,FPR2                                                                                                                                                                                                                                                                                                                      |
| REAC:R-HSA-162582           | Signal Transduction           | 0.000562416 | 3.249942189 | 92 | MMP7,PPBP,CXCR6,TTR,CXCR1,CXCR2,OR7C1,GPR20,OR2B11,PF4,P2RY10,CXCR4,ETV4,SGO1,CCR2,OR7A5,CXCR3,PROK2,F2RL3,GATA3,CXCL8,COL1A2,GIPR,LCK,TNFRSF10D,RGS1,ARHGEF35,GHRHR,FFAR2,HCAR3,OR2B6,GPR15,WNT6,HSPB1,HRH4,OR2A7,NOTCH3,SCT,IL3RA,NGFR,RUNX3,IL2RB,TRIP10,RRAD,P2RY14,OR51E1,GPR4,ADORA2A,COL1A1,IQGAP2,ADM2,ADRA2B,COL3A1,RCVRN,COL27A1,GPER1,OR5K2,IGF2,H2AC6,S1PR4,DNAJB1,MMP9,PRKX,TNFRSF10A,SYDE1,H2AC7,IHH,FOXO4,IL2RG,DLL4,COL4A4,APOC4,TLR9,GFRA3,H2BC11,C5AR1,FLT4,CYSLTR2,PIK3R5,PGF,KIF5A,PTH1R |

|                   |                                                      |             |             |    |                                                                                                                                                                                                                                                                                                                                                                                                                                                                                                                                                                                            |
|-------------------|------------------------------------------------------|-------------|-------------|----|--------------------------------------------------------------------------------------------------------------------------------------------------------------------------------------------------------------------------------------------------------------------------------------------------------------------------------------------------------------------------------------------------------------------------------------------------------------------------------------------------------------------------------------------------------------------------------------------|
| REAC:R-HSA-168256 | Immune System                                        | 0.005462988 | 2.262569739 | 74 | ,COL6A2,FZD9,LEF1,MYH11,<br>H2BC9,LATS2,MYL9,FPR2,C<br>BX2,PCK1<br>MMP8,PPBP,CD40LG,TTR,NC<br>R1,CXCR1,CXCR2,HSPA6,PIG<br>R,IL1R2,MCEMP1,CCR2,NLR<br>P4,TREML4,IL7R,S100A12,HP,<br>ORM1,GATA3,CXCL8,COL1A<br>2,LCK,IL24,CLEC4D,HSPA1A,<br>CD177,TCN1,LILRA4,C6,LYZ,<br>P2RX7,IL3RA,CD3E,ANPEP,G<br>ZMM,CR1,JAML,IL2RB,MGA<br>M,SLAMF6,TNFSF14,CEACA<br>M1,TLR8,IL18RAP,BLK,VNN1<br>,LILRB5,AOC1,ADGRG3,COL<br>1A1,IQGAP2,FOLR3,COL3A1,<br>IFNA2,KLRB1,PRLR,BTN1A1,<br>FCGR2B,CFHR3,MMP9,TLR5,<br>IL18R1,CNN2,C7,IL2RG,TNFR<br>SF12A,TLR9,GFRA3,C5AR1,S<br>100P,KIF5A,CD180,TRIM63,F<br>PR2 |
| REAC:R-HSA-109582 | Hemostasis                                           | 0.008164756 | 2.088056792 | 32 | PPBP,SERPINA5,PF4,ORM1,IT<br>GA10,F2RL3,GATA3,COL1A2,<br>CD2,LCK,TNFRSF10D,MMRN<br>1,CD177,MAFF,P2RX7,ANGP<br>T2,JAML,CEACAM1,ITGA5,C<br>OL1A1,NFE2,ADRA2B,IFNA2,<br>IGF2,TNFRSF10A,SERPINF2,<br>DOK2,KIF1C,PIK3R5,SELENO<br>P,KIF5A,TOR4A                                                                                                                                                                                                                                                                                                                                                 |
| REAC:R-HSA-418594 | G alpha (i) signalling<br>events                     | 0.093256027 | 1.030323089 | 21 | PPBP,CXCR6,TTR,CXCR1,CX<br>CR2,PF4,CXCR4,CCR2,CXCR<br>3,CXCL8,RGS1,HCAR3,HRH4,<br>P2RY14,ADRA2B,RCVRN,GP<br>ER1,S1PR4,PRKX,C5AR1,FPR<br>2                                                                                                                                                                                                                                                                                                                                                                                                                                                  |
| REAC:R-HSA-202733 | Cell surface<br>interactions at the<br>vascular wall | 0.131182326 | 0.882124673 | 13 | PF4,COL1A2,CD2,LCK,TNFRS<br>F10D,CD177,ANGPT2,JAML,C<br>EACAM1,ITGA5,COL1A1,TNF<br>RSF10A,DOK2                                                                                                                                                                                                                                                                                                                                                                                                                                                                                             |

**Table 5** Topology table for up and down regulated genes

| Category | Node     | Degree | Betweenness | Stress   | Closeness |
|----------|----------|--------|-------------|----------|-----------|
| Up       | PAK1     | 173    | 0.028159    | 40928804 | 0.323514  |
| Up       | ELAVL2   | 123    | 0.017931    | 49416154 | 0.288766  |
| Up       | NSF      | 115    | 0.020114    | 23044990 | 0.326051  |
| Up       | HTR2C    | 114    | 0.018259    | 29134326 | 0.29829   |
| Up       | TERT     | 109    | 0.013862    | 12161812 | 0.330253  |
| Up       | KRT5     | 90     | 0.011287    | 14388756 | 0.327439  |
| Up       | GPRASP2  | 83     | 0.012488    | 16027128 | 0.299805  |
| Up       | CHRM4    | 83     | 0.013908    | 10442482 | 0.306192  |
| Up       | MYB      | 82     | 0.011101    | 11639612 | 0.302896  |
| Up       | PRKCE    | 82     | 0.010414    | 13383932 | 0.317181  |
| Up       | SH3GL2   | 81     | 0.015009    | 8602342  | 0.310041  |
| Up       | NEFL     | 80     | 0.011512    | 5837396  | 0.325809  |
| Up       | CD70     | 80     | 0.010479    | 24671164 | 0.281655  |
| Up       | DCLK1    | 80     | 0.009007    | 8668148  | 0.299411  |
| Up       | CHRNA9   | 74     | 0.012796    | 6636898  | 0.273363  |
| Up       | C6orf141 | 74     | 0.012519    | 22948968 | 0.282449  |
| Up       | NRG1     | 70     | 0.011734    | 13185638 | 0.286376  |
| Up       | UBE2U    | 69     | 0.0133      | 12297096 | 0.284087  |
| Up       | MAS1     | 68     | 0.011565    | 6079632  | 0.304668  |
| Up       | DSG1     | 66     | 0.006721    | 7395226  | 0.325361  |



|    |           |    |          |          |          |
|----|-----------|----|----------|----------|----------|
| Up | SYT1      | 62 | 0.008216 | 6702626  | 0.30212  |
| Up | HPRT1     | 62 | 0.006281 | 10787838 | 0.300254 |
| Up | NEFM      | 62 | 0.006421 | 5424570  | 0.308176 |
| Up | PLK4      | 61 | 0.007071 | 9899496  | 0.283697 |
| Up | DYNC1H1   | 58 | 0.008029 | 13075920 | 0.29282  |
| Up | SERPINB2  | 57 | 0.007714 | 10923044 | 0.280615 |
| Up | MDH1      | 57 | 0.005988 | 11576132 | 0.30161  |
| Up | FATE1     | 57 | 0.012052 | 13973146 | 0.266928 |
| Up | ATP12A    | 57 | 0.01499  | 6636836  | 0.285227 |
| Up | VSIG1     | 57 | 0.007035 | 14538940 | 0.275447 |
| Up | MOS       | 56 | 0.006895 | 5823686  | 0.298519 |
| Up | RAB3A     | 54 | 0.00791  | 5354190  | 0.297217 |
| Up | CADPS     | 54 | 0.008146 | 5092982  | 0.287011 |
| Up | PTPN3     | 52 | 0.006799 | 3138966  | 0.310784 |
| Up | PLK2      | 52 | 0.007488 | 8564946  | 0.288111 |
| Up | PNMA2     | 52 | 0.007674 | 3911212  | 0.301569 |
| Up | NEFH      | 52 | 0.005669 | 4367880  | 0.308983 |
| Up | GRIN2B    | 50 | 0.005221 | 8685832  | 0.284393 |
| Up | INA       | 50 | 0.005513 | 4826808  | 0.304052 |
| Up | PPEF1     | 49 | 0.005028 | 3077816  | 0.297391 |
| Up | TACR1     | 48 | 0.006838 | 4984298  | 0.266745 |
| Up | EGR1      | 47 | 0.006124 | 6985264  | 0.290376 |
| Up | SNAP25    | 46 | 0.005405 | 2840312  | 0.301281 |
| Up | PTPRR     | 46 | 0.006717 | 3023620  | 0.297578 |
| Up | AKAP5     | 46 | 0.00726  | 8846218  | 0.282063 |
| Up | MYOG      | 45 | 0.007307 | 7976338  | 0.273781 |
| Up | SYP       | 42 | 0.005295 | 6009614  | 0.280698 |
| Up | CHGB      | 42 | 0.004402 | 1985544  | 0.301432 |
| Up | GDA       | 41 | 0.006789 | 14090952 | 0.274293 |
| Up | PRMT8     | 40 | 0.004426 | 2202906  | 0.290875 |
| Up | NELL1     | 39 | 0.005924 | 5040984  | 0.294897 |
| Up | FLT3      | 37 | 0.003048 | 2106224  | 0.298586 |
| Up | NELL2     | 37 | 0.004661 | 2218788  | 0.266745 |
| Up | RTN1      | 36 | 0.005687 | 5502506  | 0.260892 |
| Up | ADCYAP1   | 35 | 0.005746 | 13075048 | 0.240147 |
| Up | RAB3B     | 34 | 0.006122 | 2292976  | 0.294831 |
| Up | STMN2     | 33 | 0.00397  | 1770596  | 0.296511 |
| Up | SERPINB13 | 32 | 0.0045   | 5247158  | 0.256141 |
| Up | GRIN2A    | 31 | 0.002348 | 3084160  | 0.283345 |
| Up | NR1H4     | 31 | 0.002749 | 4098122  | 0.289043 |
| Up | NAP1L5    | 31 | 0.003486 | 3520432  | 0.273046 |
| Up | MAP7D2    | 31 | 0.002383 | 2903454  | 0.276669 |
| Up | MYH13     | 31 | 0.003581 | 5127138  | 0.276183 |
| Up | PLCB1     | 30 | 0.002985 | 6888848  | 0.268959 |
| Up | ARL4D     | 30 | 0.003932 | 4739098  | 0.280901 |
| Up | PDP1      | 30 | 0.005082 | 8507176  | 0.275573 |
| Up | GLRA2     | 30 | 0.004682 | 2252842  | 0.270455 |
| Up | DLGAP1    | 29 | 0.002937 | 3899192  | 0.280519 |
| Up | CSN1S1    | 29 | 0.003814 | 5024846  | 0.269562 |
| Up | PPM1E     | 29 | 0.003333 | 6353814  | 0.266648 |
| Up | AVP       | 28 | 0.004318 | 4913378  | 0.254838 |
| Up | CHML      | 27 | 0.003671 | 1670908  | 0.266111 |
| Up | MAL2      | 27 | 0.004432 | 3827092  | 0.278851 |
| Up | RFX6      | 27 | 0.002862 | 2398226  | 0.270123 |
| Up | HSPB3     | 26 | 0.002435 | 1605440  | 0.270389 |
| Up | P2RX2     | 26 | 0.004146 | 11179848 | 0.237584 |
| Up | CAP2      | 25 | 0.002331 | 3475372  | 0.277761 |
| Up | F7        | 25 | 0.00398  | 3619126  | 0.279736 |
| Up | GAP43     | 25 | 0.002633 | 3213868  | 0.271098 |
| Up | ROBO2     | 25 | 0.00361  | 1673720  | 0.270876 |
| Up | HTR2A     | 24 | 0.002224 | 5272268  | 0.25469  |
| Up | NLRP2     | 24 | 0.002474 | 3046242  | 0.281739 |
| Up | GAD1      | 24 | 0.002699 | 1543090  | 0.296724 |
| Up | ALOX12B   | 24 | 0.002911 | 1524586  | 0.284112 |
| Up | RPH3A     | 23 | 0.00392  | 1274136  | 0.28917  |
| Up | STAT4     | 23 | 0.00225  | 3186110  | 0.277109 |
| Up | PAK3      | 22 | 7.45E-04 | 1359976  | 0.269826 |
| Up | BDNF      | 22 | 0.002084 | 2214532  | 0.274065 |
| Up | NRN1      | 22 | 0.002343 | 2904362  | 0.229884 |
| Up | PAX5      | 21 | 0.001571 | 1209290  | 0.273747 |

|      |          |     |          |          |          |
|------|----------|-----|----------|----------|----------|
| Up   | NCALD    | 21  | 0.002094 | 742050   | 0.290708 |
| Up   | NXPH2    | 21  | 0.001483 | 2282474  | 0.241383 |
| Up   | CAMK4    | 21  | 0.0013   | 2651870  | 0.265641 |
| Up   | RGS7     | 20  | 0.001629 | 2101340  | 0.281439 |
| Up   | TDO2     | 20  | 0.001135 | 1237716  | 0.254347 |
| Up   | CT55     | 20  | 0.003323 | 1125688  | 0.28481  |
| Up   | GABRG2   | 19  | 0.002225 | 2260632  | 0.244571 |
| Up   | ENC1     | 19  | 0.001288 | 2259178  | 0.27747  |
| Up   | MYPN     | 19  | 0.001796 | 2745936  | 0.267176 |
| Up   | FGF12    | 19  | 0.002205 | 2840438  | 0.275332 |
| Up   | SYN2     | 19  | 0.001259 | 1054996  | 0.279393 |
| Up   | RHO      | 19  | 0.002088 | 2186802  | 0.262102 |
| Up   | NAPB     | 19  | 0.001486 | 1681700  | 0.256091 |
| Up   | ADRA1D   | 19  | 0.001857 | 2080534  | 0.26814  |
| Up   | GABRD    | 19  | 0.002339 | 2055124  | 0.249105 |
| Up   | F2RL2    | 19  | 0.00182  | 2963726  | 0.265641 |
| Up   | RAB27B   | 18  | 0.002824 | 1258866  | 0.263093 |
| Up   | BEX1     | 18  | 0.001303 | 619184   | 0.271176 |
| Up   | HRG      | 18  | 0.001925 | 3325830  | 0.248993 |
| Up   | NMU      | 17  | 0.003046 | 950374   | 0.244237 |
| Up   | TAC1     | 17  | 0.00292  | 2083210  | 0.267014 |
| Up   | CDH8     | 17  | 8.86E-04 | 1263642  | 0.260368 |
| Up   | PIWIL1   | 17  | 0.001003 | 629764   | 0.284026 |
| Up   | KRT82    | 17  | 0.001168 | 1799040  | 0.2675   |
| Up   | MUCL1    | 17  | 0.003019 | 3086562  | 0.265513 |
| Up   | TRHDE    | 17  | 0.002298 | 3972136  | 0.256499 |
| Up   | DYDC1    | 16  | 8.21E-04 | 560938   | 0.253908 |
| Up   | NPSR1    | 16  | 0.001909 | 2186922  | 0.259774 |
| Up   | RGS4     | 15  | 0.001288 | 1683598  | 0.263533 |
| Up   | GAD2     | 3   | 2.36E-05 | 48934    | 0.245242 |
| Up   | RBFOX1   | 2   | 8.89E-05 | 107910   | 0.244662 |
| Up   | TAC3     | 2   | 1.02E-04 | 103622   | 0.238733 |
| Up   | SVOP     | 2   | 3.00E-05 | 59688    | 0.224049 |
| Up   | IL12RB2  | 1   | 0        | 0        | 0.216989 |
| Up   | RAB3C    | 1   | 0        | 0        | 0.224315 |
| Up   | CARTPT   | 1   | 0        | 0        | 0.218611 |
| Up   | SV2B     | 1   | 0        | 0        | 0.23203  |
| Up   | CACNB4   | 1   | 0        | 0        | 0.23203  |
| Up   | C1QL3    | 1   | 0        | 0        | 0.254641 |
| Up   | ANKRD7   | 1   | 0        | 0        | 0.263198 |
| Up   | B4GALT6  | 1   | 0        | 0        | 0.20309  |
| Up   | SYT2     | 1   | 0        | 0        | 0.23203  |
| Up   | VSNL1    | 1   | 0        | 0        | 0.232823 |
| Up   | KCNS2    | 1   | 0        | 0        | 0.210696 |
| Up   | CCDC185  | 1   | 0        | 0        | 0.246605 |
| Up   | PGM2L1   | 1   | 0        | 0        | 0.206214 |
| Up   | CDH18    | 1   | 0        | 0        | 0.214943 |
| Up   | ATP8A2   | 1   | 0        | 0        | 0.265332 |
| Up   | NRXN3    | 1   | 0        | 0        | 0.251972 |
| Up   | MLLT11   | 1   | 0        | 0        | 0.229796 |
| Up   | C11orf87 | 1   | 0        | 0        | 0.238415 |
| Up   | SYT4     | 1   | 0        | 0        | 0.23203  |
| Up   | ADRB3    | 1   | 0        | 0        | 0.236673 |
| Up   | RXFP1    | 1   | 0        | 0        | 0.220015 |
| Up   | KISS1    | 1   | 0        | 0        | 0.215237 |
| Down | UBD      | 654 | 0.15112  | 2.24E+08 | 0.361138 |
| Down | MKI67    | 484 | 0.110753 | 1.42E+08 | 0.352211 |
| Down | HSPB1    | 483 | 0.110888 | 1.71E+08 | 0.357197 |
| Down | PYHIN1   | 342 | 0.066113 | 58482622 | 0.336832 |
| Down | TES      | 291 | 0.061653 | 61255336 | 0.354858 |
| Down | RBPMS    | 227 | 0.048426 | 53178790 | 0.313036 |
| Down | LATS2    | 216 | 0.040908 | 40957474 | 0.340177 |
| Down | LCK      | 162 | 0.031545 | 30303362 | 0.331978 |
| Down | EPHA2    | 154 | 0.028721 | 23266342 | 0.339461 |
| Down | ANLN     | 153 | 0.024763 | 22039474 | 0.327845 |
| Down | SERPINH1 | 150 | 0.024753 | 28138694 | 0.341618 |
| Down | TP63     | 142 | 0.022498 | 24847586 | 0.324212 |
| Down | KRT15    | 138 | 0.026351 | 14360242 | 0.32731  |
| Down | DNAJB1   | 127 | 0.019403 | 22378202 | 0.325328 |
| Down | HSPA6    | 121 | 0.016967 | 24899482 | 0.324642 |

|      |           |     |          |          |          |
|------|-----------|-----|----------|----------|----------|
| Down | TEAD2     | 116 | 0.01537  | 10601488 | 0.31825  |
| Down | SLAMF1    | 114 | 0.023056 | 23597596 | 0.297632 |
| Down | IL7R      | 109 | 0.012174 | 23407182 | 0.301845 |
| Down | TRIM63    | 104 | 0.021726 | 28194588 | 0.297659 |
| Down | UHRF1     | 87  | 0.010293 | 9157378  | 0.31776  |
| Down | KIF1C     | 87  | 0.010567 | 14165088 | 0.300691 |
| Down | NOTCH3    | 80  | 0.014787 | 15201970 | 0.306249 |
| Down | GFI1B     | 80  | 0.013113 | 10842648 | 0.303466 |
| Down | DKKL1     | 78  | 0.014836 | 23803094 | 0.280092 |
| Down | PCK1      | 77  | 0.007681 | 13743418 | 0.303577 |
| Down | COL1A1    | 76  | 0.01344  | 7278036  | 0.313377 |
| Down | KRT19     | 75  | 0.007277 | 9943438  | 0.311091 |
| Down | FANCC     | 74  | 0.009764 | 8216824  | 0.309388 |
| Down | FPR2      | 74  | 0.011769 | 13954910 | 0.261594 |
| Down | MYH11     | 73  | 0.007581 | 17559364 | 0.295029 |
| Down | S100A4    | 72  | 0.010394 | 5315164  | 0.320658 |
| Down | ITGA5     | 66  | 0.011449 | 10345216 | 0.302093 |
| Down | CBX2      | 66  | 0.008779 | 13925408 | 0.291941 |
| Down | TTR       | 65  | 0.008634 | 7419964  | 0.302979 |
| Down | SGO1      | 65  | 0.007788 | 13289692 | 0.278992 |
| Down | KANK2     | 65  | 0.008311 | 4874830  | 0.323324 |
| Down | NGFR      | 64  | 0.009393 | 8007396  | 0.313779 |
| Down | TRIP10    | 64  | 0.008122 | 13028764 | 0.291426 |
| Down | BLK       | 64  | 0.0107   | 17329554 | 0.297297 |
| Down | SYDE1     | 64  | 0.003939 | 4450816  | 0.287948 |
| Down | CXCR4     | 63  | 0.007485 | 10836722 | 0.289512 |
| Down | LEF1      | 61  | 0.007391 | 6350706  | 0.298344 |
| Down | TNFRSF10A | 61  | 0.010834 | 8048490  | 0.288917 |
| Down | GATA3     | 60  | 0.007917 | 5540288  | 0.311223 |
| Down | LYZ       | 59  | 0.005302 | 10916132 | 0.302217 |
| Down | PTH1R     | 53  | 0.009808 | 9310524  | 0.281487 |
| Down | FOXA3     | 53  | 0.005544 | 3422360  | 0.298748 |
| Down | CCR2      | 52  | 0.010443 | 11006662 | 0.27281  |
| Down | MMP9      | 51  | 0.008978 | 3281478  | 0.274258 |
| Down | HP        | 51  | 0.00693  | 5312024  | 0.304458 |
| Down | ABCC2     | 49  | 0.00821  | 8016758  | 0.284026 |
| Down | COL1A2    | 49  | 0.0058   | 4123054  | 0.298155 |
| Down | KIF5A     | 48  | 0.008469 | 6093688  | 0.297712 |
| Down | GEM       | 48  | 0.006291 | 5887716  | 0.289753 |
| Down | TNFRSF10D | 47  | 0.004006 | 4841196  | 0.275286 |
| Down | TBX3      | 46  | 0.003966 | 6776878  | 0.304122 |
| Down | TGFB111   | 45  | 0.005439 | 2236700  | 0.316467 |
| Down | DOK2      | 44  | 0.004931 | 2719906  | 0.298519 |
| Down | IL1R2     | 42  | 0.005083 | 7132876  | 0.270488 |
| Down | RUNX3     | 42  | 0.003872 | 6891482  | 0.283017 |
| Down | SERPINA5  | 41  | 0.006095 | 10451870 | 0.259174 |
| Down | ADAM33    | 41  | 0.007471 | 2763720  | 0.275195 |
| Down | FOXC2     | 40  | 0.00431  | 2542046  | 0.287848 |
| Down | VNN2      | 40  | 0.006975 | 9163084  | 0.245333 |
| Down | MAFF      | 39  | 0.006108 | 6202430  | 0.270333 |
| Down | IL2RG     | 39  | 0.004818 | 3065952  | 0.286774 |
| Down | HAL       | 39  | 0.005077 | 7921062  | 0.272686 |
| Down | CACNG5    | 39  | 0.00689  | 10012096 | 0.258202 |
| Down | CNN2      | 38  | 0.003478 | 3117688  | 0.308522 |
| Down | CD3E      | 37  | 0.004444 | 1846130  | 0.285548 |
| Down | HIC1      | 37  | 0.002325 | 4445664  | 0.280889 |
| Down | MMP7      | 37  | 0.004334 | 4687842  | 0.261967 |
| Down | PIGR      | 36  | 0.004518 | 3553372  | 0.286252 |
| Down | COL6A2    | 36  | 0.006829 | 4592548  | 0.26563  |
| Down | FLT4      | 34  | 0.00523  | 3858760  | 0.292406 |
| Down | CRNN      | 34  | 0.003756 | 5529764  | 0.265822 |
| Down | TNS1      | 33  | 0.002772 | 2522944  | 0.283211 |
| Down | TLR9      | 33  | 0.004962 | 9237656  | 0.27208  |
| Down | AZGP1     | 33  | 0.002456 | 4065630  | 0.283844 |
| Down | PITX1     | 32  | 0.004421 | 2343672  | 0.289271 |
| Down | SLC38A2   | 32  | 0.003422 | 3980992  | 0.276299 |
| Down | S100P     | 31  | 0.002822 | 2548722  | 0.287835 |
| Down | IL2RB     | 31  | 0.002118 | 1912550  | 0.299873 |
| Down | SAP25     | 30  | 0.002022 | 3734230  | 0.269243 |
| Down | IQGAP2    | 29  | 0.00233  | 3195168  | 0.279973 |

|      |             |    |          |         |          |
|------|-------------|----|----------|---------|----------|
| Down | FHL5        | 29 | 0.003089 | 4224230 | 0.259683 |
| Down | LYG2        | 29 | 0.006032 | 1839648 | 0.2718   |
| Down | E2F2        | 28 | 0.003259 | 4455944 | 0.277633 |
| Down | AJUBA       | 28 | 0.002664 | 1325164 | 0.30422  |
| Down | COL8A1      | 28 | 0.003201 | 4474880 | 0.263219 |
| Down | CKM         | 28 | 0.003473 | 2628128 | 0.276264 |
| Down | ZC3H12A     | 28 | 0.002855 | 3844038 | 0.279322 |
| Down | SIK1        | 28 | 0.002844 | 5143526 | 0.282836 |
| Down | NFE2        | 27 | 0.003585 | 2996958 | 0.257789 |
| Down | CYSLTR2     | 27 | 0.003188 | 5442164 | 0.260419 |
| Down | FOXO4       | 26 | 0.001596 | 2850706 | 0.282932 |
| Down | ITPRIP      | 26 | 0.005136 | 1403128 | 0.289145 |
| Down | CXCR2       | 25 | 0.002852 | 1512172 | 0.248282 |
| Down | CXCL8       | 25 | 0.003976 | 2693066 | 0.27452  |
| Down | ADORA2A     | 25 | 0.002427 | 3913074 | 0.258687 |
| Down | PPBP        | 25 | 0.002728 | 5682784 | 0.254877 |
| Down | MYL9        | 25 | 0.002755 | 1417230 | 0.312621 |
| Down | FOXJ1       | 25 | 0.002844 | 3072104 | 0.269364 |
| Down | TLR5        | 25 | 0.002706 | 3772068 | 0.209116 |
| Down | UBASH3A     | 25 | 0.002111 | 2511872 | 0.286376 |
| Down | IL24        | 25 | 0.001705 | 2208432 | 0.279878 |
| Down | FNDC11      | 25 | 0.002638 | 1382328 | 0.273476 |
| Down | CD2         | 24 | 0.002495 | 1138490 | 0.28421  |
| Down | PRLR        | 24 | 0.00185  | 2555138 | 0.26921  |
| Down | IGF2        | 24 | 0.004788 | 1590838 | 0.279028 |
| Down | CEACAM1     | 24 | 0.002966 | 3423386 | 0.27976  |
| Down | FCGR2B      | 24 | 0.002147 | 2868264 | 0.282533 |
| Down | CCDC102A    | 24 | 0.00323  | 2192490 | 0.257849 |
| Down | COL3A1      | 23 | 8.40E-04 | 861406  | 0.262445 |
| Down | FOXD3       | 23 | 0.001402 | 1312200 | 0.263481 |
| Down | GPRC5A      | 23 | 0.001394 | 2330634 | 0.276541 |
| Down | SIX1        | 21 | 0.002036 | 1876960 | 0.246422 |
| Down | SERPINF2    | 21 | 0.001831 | 3513870 | 0.243876 |
| Down | NANOS2      | 21 | 0.002169 | 2656028 | 0.24217  |
| Down | ACAN        | 20 | 0.002762 | 3879096 | 0.228202 |
| Down | CXCR1       | 3  | 9.72E-06 | 13098   | 0.22333  |
| Down | ALX4        | 2  | 1.13E-05 | 12912   | 0.239894 |
| Down | TBX2        | 2  | 1.83E-05 | 28734   | 0.246275 |
| Down | TGFBI       | 2  | 0        | 0       | 0.242499 |
| Down | SLC12A7     | 2  | 2.60E-05 | 44798   | 0.221556 |
| Down | MAGEA12     | 2  | 5.51E-05 | 31038   | 0.220742 |
| Down | ADAMTS2     | 2  | 3.48E-05 | 69644   | 0.234841 |
| Down | COL8A2      | 1  | 0        | 0       | 0.208378 |
| Down | PRELP       | 1  | 0        | 0       | 0.238613 |
| Down | ANGPT2      | 1  | 0        | 0       | 0.232014 |
| Down | MS4A1       | 1  | 0        | 0       | 0.249246 |
| Down | P2RY14      | 1  | 0        | 0       | 0.221935 |
| Down | TBX6        | 1  | 0        | 0       | 0.238415 |
| Down | SIT1        | 1  | 0        | 0       | 0.249246 |
| Down | PF4         | 1  | 0        | 0       | 0.215398 |
| Down | TLR8        | 1  | 0        | 0       | 0.213893 |
| Down | VHLL        | 1  | 0        | 0       | 0.238415 |
| Down | PIK3R5      | 1  | 0        | 0       | 0.232536 |
| Down | FOXD1       | 1  | 0        | 0       | 0.208542 |
| Down | CSNK1G2-AS1 | 1  | 0        | 0       | 0.238415 |
| Down | MMRN1       | 1  | 0        | 0       | 0.237362 |
| Down | ETV4        | 1  | 0        | 0       | 0.244843 |
| Down | ONECUT1     | 1  | 0        | 0       | 0.203917 |
| Down | CXCR3       | 1  | 0        | 0       | 0.210696 |
| Down | RBPM2       | 1  | 0        | 0       | 0.238415 |
| Down | MARVELD2    | 1  | 0        | 0       | 0.213286 |
| Down | CLEC18A     | 1  | 0        | 0       | 0.216046 |
| Down | ALOX15B     | 1  | 0        | 0       | 0.224315 |
| Down | BCL6B       | 1  | 0        | 0       | 0.238415 |
| Down | ORM1        | 1  | 0        | 0       | 0.244843 |
| Down | NCR1        | 1  | 0        | 0       | 0.222129 |
| Down | HOXB6       | 1  | 0        | 0       | 0.246605 |
| Down | SAMD4A      | 1  | 0        | 0       | 0.216046 |
| Down | SLAMF6      | 1  | 0        | 0       | 0.249246 |
| Down | CLDN15      | 1  | 0        | 0       | 0.224665 |

|      |        |   |   |   |          |
|------|--------|---|---|---|----------|
| Down | PMAIP1 | 1 | 0 | 0 | 0.203115 |
| Down | KCNE1  | 1 | 0 | 0 | 0.22263  |
| Down | MMP8   | 1 | 0 | 0 | 0.185807 |
| Down | ADRA2B | 1 | 0 | 0 | 0.236673 |
| Down | CD163  | 1 | 0 | 0 | 0.233406 |
| Down | F2RL3  | 1 | 0 | 0 | 0.209893 |
| Down | MMP10  | 1 | 0 | 0 | 0.215237 |
| Down | COL4A4 | 1 | 0 | 0 | 0.215237 |

**Table 6** miRNA - hub gene and TF – hub gene interaction

| Regulation | Hub Genes | Degree | MicroRNA         | Regulation | Hub Genes | Degree | TF      |
|------------|-----------|--------|------------------|------------|-----------|--------|---------|
| Up         | NEFL      | 78     | hsa-mir-378a-3p  | Up         | ELAVL2    | 15     | NRF1    |
| Up         | NSF       | 45     | hsa-mir-100-5p   | Up         | MYB       | 15     | STAT1   |
| Up         | ELAVL2    | 43     | hsa-mir-27a-3p   | Up         | DCLK1     | 14     | YY1     |
| Up         | PRKCE     | 42     | hsa-mir-513a-5p  | Up         | CD70      | 10     | PPARG   |
| Up         | MYB       | 34     | hsa-mir-15b-5p   | Up         | TERT      | 10     | E2F6    |
| Up         | DCLK1     | 28     | hsa-mir-365a-3p  | Up         | PRKCE     | 9      | GATA2   |
| Up         | SH3GL2    | 23     | hsa-mir-548a-5p  | Up         | PAK1      | 7      | REL     |
| Up         | CD70      | 17     | hsa-mir-374a-5p  | Up         | KRT5      | 7      | SREBF1  |
| Up         | PAK1      | 15     | hsa-mir-107      | Up         | NSF       | 7      | SRF     |
| Up         | GPRASP2   | 15     | hsa-mir-518c-5p  | Up         | HTR2C     | 6      | JUND    |
| Up         | TERT      | 13     | hsa-mir-498      | Up         | CHRM4     | 6      | PAX2    |
| Up         | HTR2C     | 12     | hsa-mir-339-5p   | Up         | CHRNA9    | 5      | JUN     |
| Up         | KRT5      | 9      | hsa-mir-125b-5p  | Up         | SH3GL2    | 5      | EN1     |
| Up         | CHRNA9    | 6      | hsa-mir-23b-3p   | Up         | NEFL      | 5      | SREBF2  |
| Up         | CHRM4     | 4      | hsa-mir-16-5p    | Up         | GPRASP2   | 2      | HNF4A   |
| Down       | ANLN      | 126    | hsa-mir-138-1-3p | Down       | TP63      | 17     | ZNF354C |
| Down       | MKI67     | 124    | hsa-mir-548d-5p  | Down       | TES       | 11     | ARID3A  |
| Down       | SERPINH1  | 83     | hsa-mir-4726-3p  | Down       | LCK       | 10     | FOXL1   |
| Down       | LATS2     | 70     | hsa-mir-320d     | Down       | HSPB1     | 9      | RUNX2   |
| Down       | TES       | 57     | hsa-mir-1202     | Down       | PYHIN1    | 8      | TP53    |
| Down       | DNAJB1    | 42     | hsa-mir-191-5p   | Down       | SERPINH1  | 8      | FOS     |
| Down       | EPHA2     | 40     | hsa-mir-450b-5p  | Down       | ANLN      | 8      | TFAP2C  |
| Down       | HSPB1     | 22     | hsa-mir-548f-3p  | Down       | MKI67     | 7      | FOXC1   |
| Down       | RBPMS     | 19     | hsa-mir-214-3p   | Down       | DNAJB1    | 7      | EGR1    |
| Down       | TP63      | 9      | hsa-mir-139-5p   | Down       | UBD       | 6      | GATA1   |
| Down       | KRT15     | 9      | hsa-mir-1343-3p  | Down       | HSPA6     | 5      | MEF2A   |
| Down       | HSPA6     | 8      | hsa-mir-204-3p   | Down       | LATS2     | 5      | HOXA5   |
| Down       | LCK       | 6      | hsa-mir-101-3p   | Down       | EPHA2     | 5      | ELK1    |
| Down       | UBD       | 5      | hsa-mir-21-3p    | Down       | RBPMS     | 4      | SPIB    |
| Down       | PYHIN1    | 2      | hsa-mir-375      | Down       | KRT15     | 3      | SOX5    |
